# Supplementary material for: Association of community types and features in a case–control analysis of new onset type 2 diabetes across a diverse geography in Pennsylvania
Source: PubMed Central journal article supplement — BMJ Open. 2021 Jan 13;11(1):e043528. doi: 10.1136/bmjopen-2020-043528 (PMC7812110; doi:10.1136/bmjopen-2020-043528), 2021-01-13
Supplement: bmjopen-2020-043528.draft_revisions.pdf [file bmjopen-2020-043528.draft_revisions.pdf]

# BMJ Open

BMJ Open is committed to open peer review. As part of this commitment we make the peer review history of every article we publish publicly available.

When an article is published we post the peer reviewers' comments and the authors' responses online. We also post the versions of the paper that were used during peer review. These are the versions that the peer review comments apply to.

The versions of the paper that follow are the versions that were submitted during the peer review process. They are not the versions of record or the final published versions. They should not be cited or distributed as the published version of this manuscript.

BMJ Open is an open access journal and the full, final, typeset and author-corrected version of record of the manuscript is available on our site with no access controls, subscription charges or pay-per-view fees (<http://bmjopen.bmj.com>).

If you have any questions on BMJ Open's open peer review process please email [info.bmjopen@bmj.com](mailto:info.bmjopen@bmj.com)

# BMJ Open

## Association of community types and features in a case-control analysis of new onset type 2 diabetes across a diverse geography in Pennsylvania

|                               |                                                                                                                                                                                                                                                                                                                                                                                                                                                                                                                                                                                                                                                                                                                                                                                                                                                                                                                                                                                                                                                                                                                        |
|-------------------------------|------------------------------------------------------------------------------------------------------------------------------------------------------------------------------------------------------------------------------------------------------------------------------------------------------------------------------------------------------------------------------------------------------------------------------------------------------------------------------------------------------------------------------------------------------------------------------------------------------------------------------------------------------------------------------------------------------------------------------------------------------------------------------------------------------------------------------------------------------------------------------------------------------------------------------------------------------------------------------------------------------------------------------------------------------------------------------------------------------------------------|
| Journal:                      | <i>BMJ Open</i>                                                                                                                                                                                                                                                                                                                                                                                                                                                                                                                                                                                                                                                                                                                                                                                                                                                                                                                                                                                                                                                                                                        |
| Manuscript ID                 | bmjopen-2020-043528                                                                                                                                                                                                                                                                                                                                                                                                                                                                                                                                                                                                                                                                                                                                                                                                                                                                                                                                                                                                                                                                                                    |
| Article Type:                 | Original research                                                                                                                                                                                                                                                                                                                                                                                                                                                                                                                                                                                                                                                                                                                                                                                                                                                                                                                                                                                                                                                                                                      |
| Date Submitted by the Author: | 08-Aug-2020                                                                                                                                                                                                                                                                                                                                                                                                                                                                                                                                                                                                                                                                                                                                                                                                                                                                                                                                                                                                                                                                                                            |
| Complete List of Authors:     | Schwartz, BS; Johns Hopkins University Bloomberg School of Public Health, Department of Environmental Health and Engineering<br>Pollak, Jonathan; Johns Hopkins University Bloomberg School of Public Health, Department of Environmental Health and Engineering<br>Poulsen, Melissa; Geisinger, Population Health Sciences<br>Bandeem-Roche, Karen; Johns Hopkins University Bloomberg School of Public Health, Biostatistics<br>Moon, Katherine; Johns Hopkins Bloomberg School of Public Health Center for Teaching and Learning, Environmental Health & Engineering<br>DeWalle, Joseph; Geisinger, Population Health Sciences<br>Siegel, Karen; Centers for Disease Control and Prevention, National Center for Chronic Disease Prevention and Health Promotion<br>Mercado, Carla; Centers for Disease Control and Prevention, National Center for Chronic Disease Prevention and Health Promotion<br>Imperatore, Giuseppina ; Centers for Disease Control and Prevention, Division of Diabetes Translation<br>Hirsch, Annemarie; Geisinger Health System, Department of Epidemiology and Health Services Research |
| Keywords:                     | DIABETES & ENDOCRINOLOGY, EPIDEMIOLOGY, PUBLIC HEALTH                                                                                                                                                                                                                                                                                                                                                                                                                                                                                                                                                                                                                                                                                                                                                                                                                                                                                                                                                                                                                                                                  |
|                               |                                                                                                                                                                                                                                                                                                                                                                                                                                                                                                                                                                                                                                                                                                                                                                                                                                                                                                                                                                                                                                                                                                                        |

SCHOLARONE™  
Manuscripts

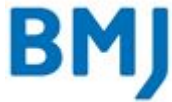

I, the Submitting Author has the right to grant and does grant on behalf of all authors of the Work (as defined in the below author licence), an exclusive licence and/or a non-exclusive licence for contributions from authors who are: i) UK Crown employees; ii) where BMJ has agreed a CC-BY licence shall apply, and/or iii) in accordance with the terms applicable for US Federal Government officers or employees acting as part of their official duties; on a worldwide, perpetual, irrevocable, royalty-free basis to BMJ Publishing Group Ltd ("BMJ") its licensees and where the relevant Journal is co-owned by BMJ to the co-owners of the Journal, to publish the Work in this journal and any other BMJ products and to exploit all rights, as set out in our [licence](#).

The Submitting Author accepts and understands that any supply made under these terms is made by BMJ to the Submitting Author unless you are acting as an employee on behalf of your employer or a postgraduate student of an affiliated institution which is paying any applicable article publishing charge ("APC") for Open Access articles. Where the Submitting Author wishes to make the Work available on an Open Access basis (and intends to pay the relevant APC), the terms of reuse of such Open Access shall be governed by a Creative Commons licence – details of these licences and which [Creative Commons](#) licence will apply to this Work are set out in our licence referred to above.

Other than as permitted in any relevant BMJ Author's Self Archiving Policies, I confirm this Work has not been accepted for publication elsewhere, is not being considered for publication elsewhere and does not duplicate material already published. I confirm all authors consent to publication of this Work and authorise the granting of this licence.

1  
2  
3 **1 Association of community types and features in a case-control analysis of new**  
4  
5 **2 onset type 2 diabetes across a diverse geography in Pennsylvania**  
6  
7

8 **3 Brian S. Schwartz,<sup>1,2,4,5</sup> Jonathan S. Pollak,<sup>1</sup> Melissa N. Poulsen,<sup>5</sup> Karen Bandeen-**  
9  
10 **4 Roche,<sup>3</sup> Katherine A. Moon,<sup>1</sup> Joseph DeWalle,<sup>5</sup> Karen R. Siegel,<sup>6</sup> Carla I. Mercado,<sup>6</sup>**  
11  
12 **5 Giuseppina Imperatore,<sup>6</sup> Annemarie G. Hirsch<sup>1,5</sup>**

13  
14  
15 **6 Johns Hopkins Bloomberg School of Public Health, Baltimore, MD**  
16

17 **7 <sup>1</sup> Department of Environmental Health and Engineering**

18  
19 **8 <sup>2</sup> Department of Epidemiology**

20  
21 **9 <sup>3</sup> Department of Biostatistics**  
22  
23

24 **10 Johns Hopkins School of Medicine, Baltimore, MD**  
25

26 **11 <sup>4</sup> Department of Medicine**  
27

28 **12 Geisinger, Danville, PA**  
29

30 **13 <sup>5</sup> Department of Population Health Sciences**  
31  
32

33 **14 Centers for Disease Control and Prevention, Atlanta, GA**  
34

35 **15 <sup>6</sup> Division of Diabetes Translation, National Center for Chronic Disease Prevention**  
36  
37 **16 and Health Promotion**  
38  
39

40 **17 Corresponding author:** Brian S. Schwartz, Department of Environmental Health and  
41  
42 **18 Engineering, 615 N. Wolfe Street, Room W7041, Baltimore, MD, 21205, voice 410-955-**  
43  
44 **19 4158, email [bschwar1@jhu.edu](mailto:bschwar1@jhu.edu).**

45  
46  
47 **20 Word count:** abstract = 287, manuscript = 3122 | **Tables and figures = 4 | Online**  
48  
49 **21 supplement tables = 6 | References = 35**  
50

51 **22 Running title:** Geography of type 2 diabetes in Pennsylvania  
52  
53  
54 **23**  
55  
56  
57  
58  
59  
60

1  
2  
3 24 **Abstract**  
4

5 25 Objectives: To evaluate associations of community types and features with new onset  
6  
7  
8 26 type 2 diabetes in diverse communities. Understanding the location and scale of  
9  
10 27 geographic disparities can lead to community-level interventions.

11  
12 28 Design: Nested case-control study within the open dynamic cohort of health system  
13  
14  
15 29 patients.

16  
17 30 Setting: Large, integrated health system in 37 counties in central and northeastern  
18  
19 31 Pennsylvania, USA.

20  
21 32 Participants and analysis: We used electronic health records to identify persons with  
22  
23 33 new-onset type 2 diabetes from 2008–2016 (n = 15,888). Persons with diabetes were  
24  
25 34 age, sex, and year matched (1:5) to persons without diabetes (n = 79,435). We used  
26  
27 35 generalized estimating equations to control for individual-level confounding variables,  
28  
29 36 accounting for clustering of persons within communities. Communities were defined as  
30  
31 37 1) townships, boroughs, and city census tracts; 2) urbanized area (large metro), urban  
32  
33 38 cluster (small cities and towns), and rural; 3) combination of the first two; and 4) county.  
34  
35 39 Community socioeconomic deprivation and greenness were evaluated alone and in  
36  
37 40 models stratified by community types.  
38  
39  
40

41 41 Results: Borough and city census tract residence (vs. townships) were associated (odds  
42  
43 42 ratio [95% confidence interval]) with higher odds of type 2 diabetes (1.10 [1.04-1.16]  
44  
45 43 and 1.34 [1.25-1.44], respectively). Urbanized areas (vs. rural) also had increased odds  
46  
47 44 of type 2 diabetes (1.14 [1.08-1.21]). In the combined definition, the strongest  
48  
49 45 associations (vs. townships in rural areas) were city census tracts in urban clusters  
50  
51 46 (1.41 [1.22-1.62]) and city census tracts in urbanized areas (1.33 [1.22-1.45]). Higher  
52  
53  
54  
55  
56  
57  
58  
59  
60

1  
2  
3 47 community socioeconomic deprivation and lower greenness were each associated with  
4  
5 48 increased odds.  
6

7  
8 49 Conclusions: Urban residence was associated with higher odds of type 2 diabetes than  
9  
10 50 for other areas. Higher community socioeconomic deprivation in city census tracts and  
11  
12 51 lower greenness in all community types were also associated with type 2 diabetes.  
13  
14

15 52

### 17 53 **Strengths and limitations of this study**

- 19 54 • Type 2 diabetes, with a large sample size, was objectively documented and verified  
20  
21 55 or excluded with extensive biomarker and medical data.  
22  
23
- 24 56 • Temporality was appropriate for all independent variables.  
25
- 26 57 • We studied several approaches to community characterization at more relevant  
27  
28 58 contextual scales than many prior studies in a range of communities from urban to  
29  
30 59 rural.  
31  
32
- 33 60 • We did not measure behavioral mediators of the community definitions and features,  
34  
35 61 such as physical activity or dietary intake.  
36  
37
- 38 62 • We could not account for residential selection bias, but the residential stability and  
39  
40 63 general population representativeness of our study population may mitigate these  
41  
42 64 concerns.  
43  
44

45 65

46 66

47 67  
48  
49  
50  
51  
52  
53  
54  
55  
56  
57  
58  
59  
60

## 68 INTRODUCTION

69 Diabetes is a common and costly chronic disease; in the U.S. in 2018, over 34  
70 million individuals had diabetes, with annual spending exceeding \$320 billion [1].

71 Diabetes occurrence varies by race/ethnicity and also evidences geographic disparities  
72 [2, 3]; prevalence by county in the U.S. varies over a 7-fold range [4]. Studies report that  
73 diabetes is 17% more prevalent in rural than urban areas [5], consistent with rural health  
74 disparities for other chronic conditions [6, 7], attributed to sociodemographic factors  
75 (e.g., higher poverty, older populations) and barriers to health care access [8, 9].

76 Community characteristics that may underlie observed geographic disparities in type  
77 2 diabetes include land use (e.g., walkable vs. automobile dependent), fitness, food,  
78 and social (e.g., deprivation, disorganization) environments; greenspace (i.e., natural  
79 environments); and air pollution. Some of these are diabetogenic and others protective  
80 [10-12]. Community characteristics co-occur in patterns that differ by **community type**  
81 (e.g., higher population density co-occurs with higher deprivation and food availability  
82 and lower automobile dependence and greenness). Simultaneously evaluation and  
83 control of these domains across community types can be problematic due to limited and  
84 non-overlapping distributions that make independent attribution of disease risk to  
85 specific domains difficult [13]. An alternative is to use carefully defined community types  
86 to first identify the **location** and **geographic scale** of type 2 diabetes risk. These  
87 community types should reduce within community variation and maximize between  
88 community differences. Subsequent analyses can then stratify by community type and  
89 evaluate well-characterized **community features** in relation to type 2 diabetes risk.

1  
2  
3 90 Residential development patterns reflect a continuum from rural to urban with  
4  
5 91 variation by many community features [14]. The U.S. Census Bureau defines *urbanized*  
6  
7 92 *areas* as dense settlements with 50,000 or more residents, *urban clusters* as areas with  
8  
9 93 2500–50,000 residents, and all others as *rural* [15]. In Pennsylvania, communities are  
10  
11 94 defined administratively as townships, boroughs, and cities using census minor civil  
12  
13 95 division boundaries [16]. In combination, these two definitions provide an opportunity to  
14  
15 96 evaluate experientially and behaviorally relevant geographies as well as to further  
16  
17 97 subdivide the broad category of “rural,” which includes a range of communities that vary  
18  
19 98 in their associations with health outcomes [17, 18].  
20  
21  
22  
23

24 99 We evaluated four definitions of community across a range of community types from  
25  
26 100 rural to urban in a 37-county region of Pennsylvania, in relation to type 2 diabetes onset  
27  
28 101 to inform more robust study of the community-level features that may underlie type 2  
29  
30 102 diabetes risk. Next, because higher community socioeconomic deprivation and lower  
31  
32 103 greenness have been consistently associated with higher risk of type 2 diabetes [19,  
33  
34 104 20], we evaluated associations with these features overall and within community types.  
35  
36  
37  
38  
39

## 40 106 **METHODS**

### 41 42 107 **Study Population and Design**

43  
44 108 This study was conducted by Geisinger-Johns Hopkins Bloomberg School of Public  
45  
46 109 Health, one of four academic research centers in the Diabetes LEAD (Location,  
47  
48 110 Environmental Attributes, and Disparities) Network (<http://diabetesleadnetwork.org/>), a  
49  
50 111 collaboration funded by the Centers for Disease Control and Prevention dedicated to  
51  
52 112 providing scientific evidence to develop targeted interventions and policies to prevent  
53  
54  
55  
56  
57  
58  
59  
60



1  
2  
3 113 type 2 diabetes and related health outcomes across the U.S. The study was approved  
4  
5 114 by the Geisinger Institutional Review Board under waivers of consent and assent to use  
6  
7  
8 115 electronic health record (EHR) data.  
9

10 116 Using previously reported methods [16], we used Geisinger EHR data from 1.6  
11  
12 117 million individuals to identify new onset type 2 diabetes from 2008–2016. Individuals  
13  
14 118 represent the general population in the region with high residential stability [21]. The  
15  
16 119 study area included 37 counties in Pennsylvania (**Figure 1**). These data were used in a  
17  
18 120 nested case-control study.  
19

## 21 121 **Patient and Public Involvement**

22  
23  
24 122 Patients and public representatives were not involved in the development of the  
25  
26 123 study. Study results will be disseminated through Geisinger’s Environmental Health  
27  
28 124 Institute in its website ([https://www.geisinger.edu/research/departments-and-](https://www.geisinger.edu/research/departments-and-centers/environmental-health-institute)  
29  
30 125 [centers/environmental-health-institute](https://www.geisinger.edu/research/departments-and-centers/environmental-health-institute)) and communications to Geisinger patients and  
31  
32 126 the public.  
33  
34

## 35 127 **Identification of New Onset Type 2 Diabetes Cases and Controls**

36  
37  
38 128 Persons with type 2 diabetes (n = 15,888) were identified using diabetes encounter  
39  
40 129 diagnoses, medication orders, and laboratory test results (**Online Supplement Table**  
41  
42 130 **S1**). EHR algorithms can identify diabetes with high sensitivity, specificity, and positive  
43  
44 131 predictive value [22, 23]. Controls (n = 79,435, with 65,084 unique persons), persons  
45  
46 132 who never met any diabetes criteria, were randomly selected with replacement and  
47  
48 133 frequency-matched to cases (5:1) on age, sex, and year of encounter. To ensure that  
49  
50 134 we could identify diabetes if present, we required at least two encounters on different  
51  
52  
53 135 days with a primary care provider prior. To ensure diabetes was new onset, persons  
54  
55  
56  
57  
58  
59  
60

1  
2  
3 136 had to have at least one encounter with the health system at least two years prior  
4  
5 137 without evidence of diabetes.  
6  
7

## 8 138 **Community Types and Community Features**

9  
10 139 Addresses at last contact with the health system were geocoded using ArcGIS  
11  
12 140 version 10.4 (ESRI Inc., Redlands, CA). We used four definitions of community to  
13  
14 141 evaluate different spatial scales and a range of characterizations of the size and  
15  
16 142 urbanicity of these areas (**Figure 2**). First, using minor civil divisions and census tract  
17  
18 143 boundaries, we categorized study communities into townships, boroughs, and city  
19  
20 144 census tracts, as previously reported [24], referred to as *administrative community type*.  
21  
22 145 Townships range from agriculturally-focused rural areas to low density suburbs;  
23  
24 146 boroughs are walkable small towns of 5,000 to 10,000 persons with a core area of  
25  
26 147 gridded streets; and cities are medium-sized urban areas (largest is Scranton–Wilkes-  
27  
28 148 Barre–Hazleton Metropolitan Statistical Area, 97<sup>th</sup> in U.S. by population). Second, we  
29  
30 149 used U.S. Census Bureau’s urbanized areas and urban clusters to define residential  
31  
32 150 addresses as “major urban,” “smaller urban,” and “rural” [15], referred to as *urban/rural*  
33  
34 151 *status*. Third, to evaluate community at a more granular level, we combined the first and  
35  
36 152 second categorizations, referred to as *combined community type*. This resulted in eight  
37  
38 153 groups (city census tract/rural had few residences so were combined with borough/rural;  
39  
40 154 township/rural was reference group). Fourth, because most prior research of geographic  
41  
42 155 disparities in diabetes evaluated counties, which are much larger geographies, we  
43  
44 156 evaluated counties alone and after stratification by administrative community type.  
45  
46  
47  
48  
49

50  
51 157 We evaluated two time-varying community features. Peak (16-day composite in  
52  
53 158 early July of each year) normalized difference vegetation index (NDVI, referred to as  
54  
55  
56  
57  
58  
59  
60

1  
2  
3 159 greenness) was evaluated in 1250m squares around residences in the prior year [25].  
4  
5 160 We measured community socioeconomic deprivation using a previously described scale  
6  
7 161 [26], the sum of z-transformed values of six indicators identified from a factor analysis  
8  
9  
10 162 (proportion unemployed, less than a high school education, below poverty level, on  
11  
12 163 public assistance, not in the workforce, and without a car), using data from the  
13  
14 164 Decennial Census (2000 only) and American Community Survey (2006-2010, 2011-  
15  
16 165 2015). The scale was assigned as the closest measure prior to the year of  
17  
18  
19 166 onset/encounter.

### 21 167 **Statistical Analysis**

22  
23  
24 168 The goals of the analysis were: 1) evaluate four definitions of community in relation  
25  
26 169 to odds of type 2 diabetes onset; 2) evaluate two community features, community  
27  
28 170 socioeconomic deprivation and greenness, in relation to type 2 diabetes onset in all  
29  
30 171 communities; and 3) evaluate associations of the two community features after  
31  
32 172 stratification by community type. Analysis controlled for key individual-level confounding  
33  
34 173 variables and accounted for spatial clustering of persons within communities. Statistical  
35  
36 174 analysis was completed using Stata-MP version 15.1 (StataCorp LLC, College Station,  
37  
38 175 TX).

39  
40  
41  
42 176 Logistic regression was used to estimate associations (odds ratios, 95% confidence  
43  
44 177 intervals) using generalized estimating equations with robust standard errors and an  
45  
46 178 exchangeable correlation structure within administrative community types. We adjusted  
47  
48 179 for age (years; linear, quadratic, and cubic terms to allow for non-linearity), sex, race  
49  
50 180 (white vs. all other races), ethnicity (Hispanic vs. non-Hispanic), and percent of time  
51  
52 181 using Medical Assistance (surrogate for family socioeconomic status [ $\geq 50\%$  vs.  $< 50\%$ ])  
53  
54  
55  
56  
57  
58  
59  
60

1  
2  
3 182 [27]. We did not include body mass index (BMI, kg/m<sup>2</sup>) in models because this is likely a  
4  
5 183 mediator of community associations (inclusion would attenuate or eliminate associations  
6  
7 184 of interest). Models were first evaluated using all persons in all communities. We  
8  
9  
10 185 analyzed associations of the four definitions of community, community socioeconomic  
11  
12 186 deprivation (quartiles; 4<sup>th</sup> quartile [worst deprivation] reference group), and greenness  
13  
14 187 (tertiles) with diabetes status. Due to concerns about non-overlapping distributions  
15  
16  
17 188 resulting in extrapolation rather than adjustment (i.e., non-positivity [28]), we then  
18  
19 189 stratified the community features models by community type.

20  
21  
22 190 In sensitivity analyses, to evaluate whether access to care – and thus higher  
23  
24 191 likelihood of diabetes diagnosis – may have accounted for associations between  
25  
26 192 community and diabetes, we examined the number of prior outpatient encounters (linear  
27  
28 193 and quadratic terms) for study individuals by administrative community type and Medical  
29  
30 194 Assistance status and added this variable to regression models.  
31  
32

33 195

## 35 196 **RESULTS**

### 37 197 **Description of Study Population and Communities**

38  
39  
40 198 Individuals were predominantly white and non-Hispanic; the majority had a primary  
41  
42 199 care provider; and most cases were diagnosed with diabetes in an outpatient setting  
43  
44 200 (**Table 1**). Individuals resided in 291 boroughs, 146 city census tracts, and 633  
45  
46 201 townships (**Online Supplement Table S2**). Over 40% of persons resided in rural areas  
47  
48 202 (**Table 1**). Most borough residents were divided between urbanized areas and urban  
49  
50 203 clusters. Approximately two-thirds of persons in townships resided in rural areas. A  
51  
52 204 similar proportion of individuals in city census tracts resided in urbanized areas. On  
53  
54  
55  
56  
57  
58  
59  
60

1  
2  
3 205 average, townships had higher greenness and lower community socioeconomic  
4  
5 206 deprivation compared to boroughs and city census tracts (**Online Supplement Table**  
6  
7  
8 207 **S2**). Average racial and ethnic diversity and use of Medical Assistance for health  
9  
10 208 insurance were highest in city census tracts. The mean total number of encounters with  
11  
12 209 the health system before diabetes onset or the control selection date was high for all  
13  
14 210 individuals, in all community types, regardless of Medical Assistance status (**Online**  
15  
16 211 **Supplement Table S3**). Laboratory data confirmed that the categorization of diabetes  
17  
18 212 cases and controls was valid (**Online Supplement Table S4**).

### 21 213 **Associations of Communities with Type 2 Diabetes Onset**

24 214 In the base model, controlling for age and sex, non-white race (vs. white), Hispanic  
25  
26 215 ethnicity (vs. non-Hispanic), and Medical Assistance status were each associated with  
27  
28 216 increased odds of type 2 diabetes onset. These associations did not substantively  
29  
30 217 change as the community type and community features were added to the model. Odds  
31  
32 218 ratios for non-white race (vs. white) ranged from 1.36 to 1.41, for Hispanic ethnicity (vs.  
33  
34 219 non-Hispanic) from 1.46 to 1.52, and for Medical Assistance ( $\geq 50\%$  of time vs.  $< 50\%$ )  
35  
36 220 from 1.71 to 1.74, with all confidence intervals excluding 1.0. Next, when administrative  
37  
38 221 community type was added (townships as reference group), residing in boroughs and  
39  
40 222 city census tracts was associated with significantly higher odds (**Table 2, Model 1**).  
41  
42 223 Second, urban/rural status was added to the base model and residing in urbanized  
43  
44 224 areas (vs. rural areas) had increased odds of diabetes onset (**Table 2, Model 2**). Third,  
45  
46 225 the combined definition was added to the base model, and some categories (e.g., city  
47  
48 226 census tracts in major urban and smaller urban areas highest, boroughs in these areas  
49  
50 227 intermediate, vs. townships in rural areas as reference) were associated with increased  
51  
52  
53  
54  
55  
56  
57  
58  
59  
60

1  
2  
3 228 odds of new onset diabetes (**Table 2, Model 3**). Finally, county was added to the base  
4  
5 229 model, and seven counties were associated with reduced odds and two with increased  
6  
7 230 odds of diabetes (**Table 2, Model 4**). We next evaluated community socioeconomic  
8  
9 231 deprivation and greenness. When these community features were added to the base  
10  
11 232 model, lower deprivation (**Table 2, Model 5**) and higher greenness (**Table 2, Model 6**)  
12  
13 233 were associated with reduced odds of diabetes.  
14  
15

16  
17 234 Models were next stratified by community type (only results for administrative  
18  
19 235 community type shown). Race/ethnicity and Medical Assistance status were still  
20  
21 236 associated with type 2 diabetes onset in the stratified models in all community types  
22  
23 237 (**Online Supplement Table S5**). Associations of community socioeconomic deprivation  
24  
25 238 with diabetes evidenced decreasing odds ratios across decreasing deprivation quartiles  
26  
27 239 in all community types, but only crossed an inferential threshold in city census tracts,  
28  
29 240 with approximately 25% lower odds in the 1<sup>st</sup> vs. 4<sup>th</sup> quartile. Higher greenness was  
30  
31 241 associated with reduced odds of diabetes in all community types.  
32  
33

34  
35 242 Even after stratification by administrative community type and adjustment for  
36  
37 243 community socioeconomic deprivation, several counties were independently associated  
38  
39 244 with increased or reduced odds of diabetes onset (**Online Supplement Table S6**). The  
40  
41 245 number of significant associations (n = 18, nine each with reduced or increased odds)  
42  
43 246 was somewhat larger than that expected due to chance (108 statistical tests  
44  
45 247 performed), with most associations observed for residing in boroughs. In these models,  
46  
47 248 associations with community socioeconomic deprivation were present in the 1<sup>st</sup> quartile  
48  
49 249 (vs. 4<sup>th</sup>) in townships and boroughs and in all quartiles in city census tracts. In all  
50  
51 250 community types, higher greenness was associated with lower odds of diabetes.  
52  
53  
54  
55  
56  
57  
58  
59  
60

## 251 **Sensitivity Analyses**

252 Addition of total outpatient encounters before diagnosis/control selection date did not  
253 substantively change associations in non-stratified or stratified models (results not  
254 shown). Community socioeconomic deprivation and greenness were evaluated together  
255 in models in boroughs and townships. In boroughs, associations of greenness with type  
256 2 diabetes onset were attenuated by 1-2% and associations with community  
257 socioeconomic deprivation were no longer present. In townships, there was no  
258 substantive change in associations or inferences for greenness and associations with  
259 community socioeconomic deprivation were no longer present. These variables could  
260 not be evaluated together in city census tracts due to insufficient overlap in distributions.

261

## 262 **DISCUSSION**

263 There is great interest in understanding geographic disparities in type 2 diabetes  
264 risk. If the primary causes of these differences were community-level factors,  
265 community-level interventions could have large impacts on diabetes risk. A strong  
266 theoretical basis, and growing empirical evidence, indicates that community features  
267 contribute to diabetes risk directly or through increased risk of obesity, such as social,  
268 built, and natural environments contributing to impacts on physical activity and stress  
269 [29-31]. The primary goal of this study was to evaluate geographic disparities in type 2  
270 diabetes by evaluating four definitions of community across the full range from rural to  
271 urban. We then evaluated associations of community socioeconomic deprivation and  
272 greenness overall and in models stratified by community type, the latter greatly reducing



1  
2  
3 273 the degree to which these associations could be confounded by other community  
4  
5 274 features.

6  
7  
8 275 In the study region, the use of combined community type allowed us to carefully  
9  
10 276 identify the location and scale of risk. Risk of new onset type 2 diabetes was highest in  
11  
12 277 cities in smaller urban areas, followed by cities in major urban areas and boroughs in  
13  
14 278 major and smaller urban areas. In addition, even after accounting for community type  
15  
16 279 and features, county was independently associated with diabetes onset. While many  
17  
18 280 prior studies have evaluated county differences in diabetes risk, none have also  
19  
20 281 simultaneously evaluated communities. Our associations suggest that the risk factors  
21  
22 282 that undergird U.S. geographic differences in diabetes likely exist at multiple, nested  
23  
24 283 spatial scales. Some of the county associations were of high magnitude (e.g., exceeded  
25  
26 284 1.5 for protection or risk). Finally, there were consistent associations of higher  
27  
28 285 community socioeconomic deprivation and lower greenness with higher diabetes risk,  
29  
30 286 the former primarily in city census tracts, where average deprivation levels were higher,  
31  
32 287 and the latter in all communities. We do not believe that the apparent lower diabetes  
33  
34 288 risk in rural areas was due to less likely diagnosis due to lower access to health care,  
35  
36 289 since, on average, individuals in the study, regardless of Medical Assistance status and  
37  
38 290 community type, had high contact with the health care system.

39  
40  
41  
42 291 We found several strong and consistent associations of individual-level  
43  
44 292 characteristics. Non-white race, Hispanic ethnicity, and Medical Assistance status (a  
45  
46 293 surrogate for low family socioeconomic status) were consistently associated with 1.3 to  
47  
48 294 1.7-fold increased odds of type 2 diabetes onset. Overall, the findings suggest that  
49  
50 295 sociodemographic factors (race/ethnicity and individual-level socioeconomic status),  
51  
52  
53  
54  
55  
56  
57  
58  
59  
60



1  
2  
3 296 urbanicity, higher community socioeconomic deprivation, and lower greenness, all of  
4  
5 297 which co-occur in our region, were strong risk factors for type 2 diabetes.

7  
8 298 Our findings on elevated risk of type 2 diabetes onset in urban areas is inconsistent  
9  
10 299 with national studies that have reported higher crude prevalence estimates of type 2  
11  
12 300 diabetes in rural areas [32]. However, a study of the Behavioral Risk Factor  
13  
14 301 Surveillance System found that after adjusting for individual-level socioeconomic  
15  
16 302 measures, prevalence was higher in urban areas [33]. Geospatial predictors of diabetes  
17  
18 303 risk likely vary by community and region; prior studies have reported, for example, that  
19  
20 304 nine county-level measures of socioeconomic, race/ethnicity, and built environmental  
21  
22 305 features explained up to 94% of the variation in type 2 diabetes prevalence in the  
23  
24 306 Midwest, but very little variation in Pennsylvania [34].

26  
27  
28 307 The associations of greenness with diabetes were consistent with prior studies, but  
29  
30 308 our results are the first to demonstrate robust findings across all types of communities  
31  
32 309 while additionally controlling for county. The measurement of community features  
33  
34 310 across community types may result in measures with different interpretations in different  
35  
36 311 communities and regions; for example, agricultural, coniferous forest, and deciduous  
37  
38 312 forest greenness are not evenly distributed and have different impacts on health [18].

39  
40  
41  
42 313 Most prior studies of geographic disparities in diabetes have been cross-sectional, at  
43  
44 314 the ecologic level, relying on self-reported diabetes, and focused on prevalent diabetes  
45  
46 315 by county (too large and heterogeneous) or census tract (not experientially and  
47  
48 316 behaviorally relevant). The current study avoided all these limitations. In addition, while  
49  
50 317 many public health services are delivered at the county level, many potential  
51  
52  
53  
54  
55  
56  
57  
58  
59  
60

1  
2  
3 318 interventions to address diabetes would need to be implemented at smaller scales and  
4  
5 319 would not have county-wide impacts.

6  
7 320 The study had some limitations. Although we adjusted for Medical Assistance health  
8  
9 321 insurance as a surrogate for family socioeconomic status, there could still be residual  
10  
11 322 confounding by individual-level income [27]. We did not measure behavioral mediators  
12  
13 323 of the community definitions and features, such as physical activity or dietary intake. We  
14  
15 324 could not account for residential selection bias, in which associations are due to reverse  
16  
17 325 causation (if persons with individual-level risk factors for diabetes are more likely to  
18  
19 326 reside in certain areas, by choice or opportunity). This can be a concern in studies of  
20  
21 327 this type; social processes determine residence, so it can be difficult to distinguish  
22  
23 328 individual-level characteristics from features of communities [35]. The residential  
24  
25 329 stability and general population representativeness of our study population may mitigate  
26  
27 330 these concerns.

28  
29 331 The study had several strengths. Diabetes was objectively documented and verified  
30  
31 332 with extensive biomarker and medical data. Temporality was appropriate for all  
32  
33 333 independent variables. Study participants resided in a range of communities from urban  
34  
35 334 to rural. We studied several approaches to community characterization at more relevant  
36  
37 335 contextual scales than many prior studies and showed that smaller community contexts  
38  
39 336 were associated with diabetes onset. Stratifying by community types limited bias from  
40  
41 337 non-positivity [28].

42  
43 338 The study findings provide important clues for the location (i.e., urban) and  
44  
45 339 geographic scale (i.e., as localized as a square mile, the average area of boroughs and  
46  
47 340 city census tracts) that identifies geospatial disparities in type 2 diabetes in  
48  
49  
50  
51  
52  
53  
54  
55  
56  
57  
58  
59  
60

1  
2  
3 341 Pennsylvania. We speculate that, since risk was higher in urban areas, our findings may  
4  
5 342 suggest a smaller role for the positive features of the food and physical activity  
6  
7 343 environments present in these areas (e.g., greater access to grocery stores, more  
8  
9  
10 344 walkable neighborhoods, more commercial physical activity opportunity establishments)  
11  
12 345 and a larger role for individual and community demographic and socioeconomic factors  
13  
14  
15 346 found in the same areas.  
16  
17 347

For peer review only

### 348 **Author contributions**

349 Manuscript authors contributed in the following ways: conception of work: BSS,  
350 MNP, KRS, CIM, GI, AGH; obtained funding: BSS, AGH; study design: BSS, JSP, KBR,  
351 AGH; data management and analysis: JSP, KBR, BSS, MNP, JD, KAM, AGH; results  
352 interpretation: BSS, MNP, KBR, JD, KAM, KRS, CIM, GI, AGH; initial manuscript  
353 writing: BSS, MNP, KAM, AGH; critical revision of manuscript, final approval, and  
354 accountable for their work: BSS, JSP, MNP, KBR, KAM, JD, KRS, CIM, GI, AGH.

### 356 **Competing interests**

357 All authors declared that they have no competing interests.

### 359 **Funding**

360 This publication was made possible by Cooperative Agreement Number DP006293  
361 funded by the U.S. Centers for Disease Control and Prevention, Division of Diabetes  
362 Translation.

### 364 **Data sharing**

365 De-identified electronic health record data are available upon written request with  
366 IRB approval and a data use agreement. All community data are publicly available.

## References

1. Centers for Disease Control and Prevention, *National Diabetes Statistics Report 2020: Estimates of Diabetes and Its Burden in the United States.*, U.S. Department of Health and Human Services, Editor. 2020, Centers for Disease Control and Prevention: Atlanta, GA.
2. Garcia, M.C., et al., *Reducing Potentially Excess Deaths from the Five Leading Causes of Death in the Rural United States.* MMWR Surveill Summ, 2017. **66**(2): p. 1-7.
3. Ford, E.S., et al., *Geographic variation in the prevalence of obesity, diabetes, and obesity-related behaviors.* Obes Res, 2005. **13**(1): p. 118-22.
4. Cunningham, S.A., et al., *County-level contextual factors associated with diabetes incidence in the United States.* Ann Epidemiol, 2018. **28**(1): p. 20-25 e2.
5. Rural Health Information Hub. *Why Diabetes is a Concern for Rural Communities 2020* April 13, 2020]; Available from: <https://www.ruralhealthinfo.org/toolkits/diabetes/1/rural-concerns>.
6. Singh, G.K. and M. Siahpush, *Widening rural-urban disparities in all-cause mortality and mortality from major causes of death in the USA, 1969-2009.* J Urban Health, 2014. **91**(2): p. 272-92.
7. James, C.V., et al., *Racial/Ethnic Health Disparities Among Rural Adults - United States, 2012-2015.* MMWR Surveill Summ, 2017. **66**(23): p. 1-9.
8. Cosby, A.G., et al., *Growth and Persistence of Place-Based Mortality in the United States: The Rural Mortality Penalty.* Am J Public Health, 2019. **109**(1): p. 155-162.
9. Henning-Smith, C.E., et al., *Rural Counties With Majority Black Or Indigenous Populations Suffer The Highest Rates Of Premature Death In The US.* Health Aff (Millwood), 2019. **38**(12): p. 2019-2026.
10. Maier, W., et al., *Area level deprivation is an independent determinant of prevalent type 2 diabetes and obesity at the national level in Germany. Results from the National Telephone Health Interview Surveys 'German Health Update' GEDA 2009 and 2010.* PLoS One, 2014. **9**(2): p. e89661.
11. Muller, G., et al., *Regional and neighborhood disparities in the odds of type 2 diabetes: results from 5 population-based studies in Germany (DIAB-CORE consortium).* Am J Epidemiol, 2013. **178**(2): p. 221-30.
12. Jagai, J.S., et al., *Association between environmental quality and diabetes in the USA.* J Diabetes Investig, 2019.
13. Honold, J., et al., *Multiple environmental burdens and neighborhood-related health of city residents.* Journal of Environmental Psychology, 2012. **32**(4): p. 305-317.
14. Bennett, K.J., et al., *What Is Rural? Challenges And Implications Of Definitions That Inadequately Encompass Rural People And Places.* Health Aff (Millwood), 2019. **38**(12): p. 1985-1992.
15. Census Bureau. *Geography program: 2010 census urban and rural classification and urban area criteria.* . 2018 [cited 2020 January 5, 2020]; Available from: <https://www.census.gov/programssurveys/geography/guidance/geoareas/urban-rural/2010-urbanrural.html>.

16. Hirsch, A.G., et al., *Associations of Four Community Factors With Longitudinal Change in Hemoglobin A1c Levels in Patients With Type 2 Diabetes*. *Diabetes Care*, 2018. **41**(3): p. 461-468.
17. Cohen, S.A., et al., *A Closer Look at Rural-Urban Health Disparities: Associations Between Obesity and Rurality Vary by Geospatial and Sociodemographic Factors*. *J Rural Health*, 2017. **33**(2): p. 167-179.
18. James, W.L., *All rural places are not created equal: revisiting the rural mortality penalty in the United States*. *Am J Public Health*, 2014. **104**(11): p. 2122-9.
19. Astell-Burt, T., X. Feng, and G.S. Kolt, *Is neighborhood green space associated with a lower risk of type 2 diabetes? Evidence from 267,072 Australians*. *Diabetes Care*, 2014. **37**(1): p. 197-201.
20. Muller, G., et al., *Inner-city green space and its association with body mass index and prevalent type 2 diabetes: a cross-sectional study in an urban German city*. *BMJ Open*, 2018. **8**(1): p. e019062.
21. Casey, J.A., et al., *Unconventional Natural Gas Development and Birth Outcomes in Pennsylvania, USA*. *Epidemiology*, 2016. **27**(2): p. 163-72.
22. Lawrence, J.M., et al., *Validation of pediatric diabetes case identification approaches for diagnosed cases by using information in the electronic health records of a large integrated managed health care organization*. *Am J Epidemiol*, 2014. **179**(1): p. 27-38.
23. Zhong, V.W., et al., *Use of administrative and electronic health record data for development of automated algorithms for childhood diabetes case ascertainment and type classification: the SEARCH for Diabetes in Youth Study*. *Pediatr Diabetes*, 2014. **15**(8): p. 573-84.
24. Schwartz, B.S., et al., *Body mass index and the built and social environments in children and adolescents using electronic health records*. *Am J Prev Med*, 2011. **41**(4): p. e17-28.
25. Casey, J.A., et al., *Greenness and Birth Outcomes in a Range of Pennsylvania Communities*. *Int J Environ Res Public Health*, 2016. **13**(3).
26. Nau, C., et al., *Community socioeconomic deprivation and obesity trajectories in children using electronic health records*. *Obesity (Silver Spring)*, 2015. **23**(1): p. 207-12.
27. Casey, J.A., et al., *Measures of SES for Electronic Health Record-based Research*. *Am J Prev Med*, 2018. **54**(3): p. 430-439.
28. Petersen, M.L., et al., *Diagnosing and responding to violations in the positivity assumption*. *Stat Methods Med Res*, 2012. **21**(1): p. 31-54.
29. Cox, M., et al., *Locality deprivation and Type 2 diabetes incidence: a local test of relative inequalities*. *Soc Sci Med*, 2007. **65**(9): p. 1953-64.
30. Maier, W., et al., *The impact of regional deprivation and individual socio-economic status on the prevalence of Type 2 diabetes in Germany. A pooled analysis of five population-based studies*. *Diabet Med*, 2013. **30**(3): p. e78-86.
31. James, P., et al., *A Review of the Health Benefits of Greenness*. *Curr Epidemiol Rep*, 2015. **2**(2): p. 131-142.
32. National Center for Chronic Disease Prevention and Health Promotion. *Division of Diabetes Translation At A Glance*. 2019 January 20, 2020]; Available from: <https://www.cdc.gov/chronicdisease/resources/publications/aag/diabetes.htm>.

- 1  
2  
3 33. O'Connor, A. and G. Wellenius, *Rural-urban disparities in the prevalence of diabetes and*  
4 *coronary heart disease*. Public Health, 2012. **126**(10): p. 813-20.  
5  
6 34. Hipp, J.A. and N. Chalise, *Spatial analysis and correlates of county-level diabetes*  
7 *prevalence, 2009-2010*. Prev Chronic Dis, 2015. **12**: p. E08.  
8  
9 35. Macintyre, S. and A. Ellaway, *Ecological approaches: rediscovering the role of the*  
10 *physical and social environment.*, in *Social Epidemiology.*, I. Kawachi and L. Berkman,  
11 Editors. 2000, Oxford University Press: New York. p. 332-348.  
12  
13  
14  
15  
16  
17  
18  
19  
20  
21  
22  
23  
24  
25  
26  
27  
28  
29  
30  
31  
32  
33  
34  
35  
36  
37  
38  
39  
40  
41  
42  
43  
44  
45  
46  
47  
48  
49  
50  
51  
52  
53  
54  
55  
56  
57  
58  
59  
60

For peer review only



**Table 1.** Selected characteristics of individuals with diabetes and controls, frequency-matched to cases (5:1) on age, sex, and year of diagnosis or control selection date.

| Variable                                                                                               | Cases         | Controls      | p-value* |
|--------------------------------------------------------------------------------------------------------|---------------|---------------|----------|
| Unique persons                                                                                         | 15,888        | 65,084        | NA       |
| Number                                                                                                 | 15,888        | 79,435        | NA       |
| Sex, female, n (COL %)                                                                                 | 7798 (49.1)   | 38,988 (49.1) | matched  |
| Age at diagnosis or control selection date, years, mean (SD)                                           | 54.9 (15.1)   | 54.9 (15.3)   | matched  |
| Age, years, categories, n (COL %)                                                                      |               |               | matched  |
| 10 to < 20 years                                                                                       | 304 (1.9)     | 1520 (1.9)    |          |
| 20 to < 30 years                                                                                       | 628 (4.0)     | 3140 (4.0)    |          |
| 30 to < 40 years                                                                                       | 1611 (10.1)   | 8055 (10.1)   |          |
| 40 to < 50 years                                                                                       | 3086 (19.4)   | 15,429 (19.4) |          |
| 50 to < 60 years                                                                                       | 4286 (27.0)   | 21,428 (27.0) |          |
| 60 to < 70 years                                                                                       | 3510 (22.1)   | 17,548 (22.1) |          |
| 70 to < 80 years                                                                                       | 1737 (10.9)   | 8685 (10.9)   |          |
| 80 to < 90 years                                                                                       | 645 (4.1)     | 3225 (4.1)    |          |
| ≥ 90 years                                                                                             | 81 (0.5)      | 405 (0.5)     |          |
| Race, white, n (COL %)                                                                                 | 15,429 (97.1) | 77,867 (98.0) | < 0.001  |
| Hispanic ethnicity, n (COL %)                                                                          | 369 (2.3)     | 1094 (1.4)    | < 0.001  |
| Primary care provider†, yes, n (%)                                                                     | 11,884 (74.8) | 61,042 (76.9) | < 0.001  |
| Year of diagnosis/encounter, n (COL %)                                                                 |               |               | matched  |
| 2008                                                                                                   | 1761 (11.1)   | 8805 (11.1)   |          |
| 2009                                                                                                   | 2019 (12.7)   | 10,095 (12.7) |          |
| 2010                                                                                                   | 1747 (11.0)   | 8735 (11.0)   |          |
| 2011                                                                                                   | 1675 (10.5)   | 8373 (10.5)   |          |
| 2012                                                                                                   | 1716 (10.8)   | 8579 (10.8)   |          |
| 2013                                                                                                   | 1842 (11.6)   | 9209 (11.6)   |          |
| 2014                                                                                                   | 1844 (11.6)   | 9220 (11.6)   |          |
| 2015                                                                                                   | 1734 (10.9)   | 8669 (10.9)   |          |
| 2016                                                                                                   | 1550 (9.8)    | 7750 (9.8)    |          |
| Setting of diagnosis/encounter, n (COL %)                                                              |               |               | < 0.001  |
| Outpatient                                                                                             | 12,068 (76.0) | 73,998 (93.2) |          |
| Medication order                                                                                       | 1632 (10.3)   | 0 (0.0)       |          |
| Urgent care                                                                                            | 165 (1.0)     | 2116 (2.7)    |          |
| Emergency department                                                                                   | 1526 (9.6)    | 3068 (3.9)    |          |
| Inpatient                                                                                              | 498 (3.1)     | 252 (0.3)     |          |
| Outpatient encounters in year before diagnosis or control selection date, mean (SD)                    | 4.4 (5.1)     | 3.5 (4.1)     | < 0.001  |
| Outpatient encounters, total before diagnosis or control selection date, mean (SD)                     | 35.9 (34.8)   | 35.2 (32.5)   | 0.01     |
| Medical Assistance, % of time receiving, n (COL %)                                                     |               |               | < 0.001  |
| < 50%                                                                                                  | 14,921 (93.9) | 76,705 (83.7) |          |
| ≥ 50%                                                                                                  | 967 (6.1)     | 2730 (3.4)    |          |
| Outpatient encounters before diagnosis/encounter, mean (SD), by % of time receiving Medical Assistance |               |               | < 0.001  |



| Variable                                                                                                                                                                                                                                                                                                                                                                                                                                                                                                                                                                                                                                                                                                                                                                                                                                                                                                                                                                                                                                                                                                           | Cases       | Controls      | p-value* |
|--------------------------------------------------------------------------------------------------------------------------------------------------------------------------------------------------------------------------------------------------------------------------------------------------------------------------------------------------------------------------------------------------------------------------------------------------------------------------------------------------------------------------------------------------------------------------------------------------------------------------------------------------------------------------------------------------------------------------------------------------------------------------------------------------------------------------------------------------------------------------------------------------------------------------------------------------------------------------------------------------------------------------------------------------------------------------------------------------------------------|-------------|---------------|----------|
| 0%                                                                                                                                                                                                                                                                                                                                                                                                                                                                                                                                                                                                                                                                                                                                                                                                                                                                                                                                                                                                                                                                                                                 | 35.5 (34.1) | 34.9 (32.1)   |          |
| 0.1-24.9%                                                                                                                                                                                                                                                                                                                                                                                                                                                                                                                                                                                                                                                                                                                                                                                                                                                                                                                                                                                                                                                                                                          | 45.2 (40.7) | 42.8 (38.3)   |          |
| 25.0-74.9%                                                                                                                                                                                                                                                                                                                                                                                                                                                                                                                                                                                                                                                                                                                                                                                                                                                                                                                                                                                                                                                                                                         | 33.9 (35.8) | 35.2 (33.6)   |          |
| 75+%                                                                                                                                                                                                                                                                                                                                                                                                                                                                                                                                                                                                                                                                                                                                                                                                                                                                                                                                                                                                                                                                                                               | 29.1 (26.9) | 27.7 (26.0)   |          |
| Duration from first contact with health system to diagnosis/control selection date, years, n (%)                                                                                                                                                                                                                                                                                                                                                                                                                                                                                                                                                                                                                                                                                                                                                                                                                                                                                                                                                                                                                   |             |               | 0.72     |
| Quartile 1 (2 to < 5 years)                                                                                                                                                                                                                                                                                                                                                                                                                                                                                                                                                                                                                                                                                                                                                                                                                                                                                                                                                                                                                                                                                        | 1860 (11.7) | 9466 (11.9)   |          |
| Quartile 2 (5 to < 8 years)                                                                                                                                                                                                                                                                                                                                                                                                                                                                                                                                                                                                                                                                                                                                                                                                                                                                                                                                                                                                                                                                                        | 2571 (16.2) | 12,646 (15.9) |          |
| Quartile 3 (8 to < 12 years)                                                                                                                                                                                                                                                                                                                                                                                                                                                                                                                                                                                                                                                                                                                                                                                                                                                                                                                                                                                                                                                                                       | 4700 (29.6) | 23,665 (29.8) |          |
| Quartile 4 ( $\geq$ 12 years)                                                                                                                                                                                                                                                                                                                                                                                                                                                                                                                                                                                                                                                                                                                                                                                                                                                                                                                                                                                                                                                                                      | 6757 (42.5) | 33,658 (42.4) |          |
| Community socioeconomic deprivation, n (COL %) <sup>‡</sup>                                                                                                                                                                                                                                                                                                                                                                                                                                                                                                                                                                                                                                                                                                                                                                                                                                                                                                                                                                                                                                                        |             |               | < 0.001  |
| Quartile 1                                                                                                                                                                                                                                                                                                                                                                                                                                                                                                                                                                                                                                                                                                                                                                                                                                                                                                                                                                                                                                                                                                         | 3001 (18.9) | 17,329 (21.8) |          |
| Quartile 2                                                                                                                                                                                                                                                                                                                                                                                                                                                                                                                                                                                                                                                                                                                                                                                                                                                                                                                                                                                                                                                                                                         | 4300 (27.1) | 23,172 (29.2) |          |
| Quartile 3                                                                                                                                                                                                                                                                                                                                                                                                                                                                                                                                                                                                                                                                                                                                                                                                                                                                                                                                                                                                                                                                                                         | 4217 (26.5) | 20,328 (25.6) |          |
| Quartile 4                                                                                                                                                                                                                                                                                                                                                                                                                                                                                                                                                                                                                                                                                                                                                                                                                                                                                                                                                                                                                                                                                                         | 4370 (27.5) | 18,606 (23.4) |          |
| Greenness, peak NDVI, in buffer, n (COL %) §                                                                                                                                                                                                                                                                                                                                                                                                                                                                                                                                                                                                                                                                                                                                                                                                                                                                                                                                                                                                                                                                       |             |               | < 0.001  |
| Tertile 1                                                                                                                                                                                                                                                                                                                                                                                                                                                                                                                                                                                                                                                                                                                                                                                                                                                                                                                                                                                                                                                                                                          | 5894 (37.1) | 25,894 (32.6) |          |
| Tertile 2                                                                                                                                                                                                                                                                                                                                                                                                                                                                                                                                                                                                                                                                                                                                                                                                                                                                                                                                                                                                                                                                                                          | 5023 (31.6) | 26,751 (33.7) |          |
| Tertile 3                                                                                                                                                                                                                                                                                                                                                                                                                                                                                                                                                                                                                                                                                                                                                                                                                                                                                                                                                                                                                                                                                                          | 4971 (31.3) | 26,790 (33.7) |          |
| Administrative community type of residence, n (COL %)                                                                                                                                                                                                                                                                                                                                                                                                                                                                                                                                                                                                                                                                                                                                                                                                                                                                                                                                                                                                                                                              |             |               | < 0.001  |
| Borough                                                                                                                                                                                                                                                                                                                                                                                                                                                                                                                                                                                                                                                                                                                                                                                                                                                                                                                                                                                                                                                                                                            | 4621 (29.1) | 21,756 (27.4) |          |
| Census tract in city                                                                                                                                                                                                                                                                                                                                                                                                                                                                                                                                                                                                                                                                                                                                                                                                                                                                                                                                                                                                                                                                                               | 1806 (11.4) | 6548 (8.2)    |          |
| Township                                                                                                                                                                                                                                                                                                                                                                                                                                                                                                                                                                                                                                                                                                                                                                                                                                                                                                                                                                                                                                                                                                           | 9461 (59.6) | 51,131 (64.4) |          |
| Setting of residence, n (COL %)                                                                                                                                                                                                                                                                                                                                                                                                                                                                                                                                                                                                                                                                                                                                                                                                                                                                                                                                                                                                                                                                                    |             |               | < 0.001  |
| Rural                                                                                                                                                                                                                                                                                                                                                                                                                                                                                                                                                                                                                                                                                                                                                                                                                                                                                                                                                                                                                                                                                                              | 6513 (41.0) | 34,984 (44.0) |          |
| Urbanized area                                                                                                                                                                                                                                                                                                                                                                                                                                                                                                                                                                                                                                                                                                                                                                                                                                                                                                                                                                                                                                                                                                     | 4906 (30.9) | 23,423 (29.5) |          |
| Urban cluster                                                                                                                                                                                                                                                                                                                                                                                                                                                                                                                                                                                                                                                                                                                                                                                                                                                                                                                                                                                                                                                                                                      | 4469 (28.1) | 21,028 (26.5) |          |
| <p><b>Abbreviations:</b> COL = column; NDVI = normalized difference vegetation index; SD = standard deviation.</p> <p>* Because controls could be in these comparisons more than once, methods were used for significance testing that accounted for this, including inverse-probability weighted regression for time-invariant characteristics, mixed-effect regression for time-varying continuous (linear), binary (logistic), and count (Poisson) characteristics, and multinomial logistic regression with robust standard errors for polytomous time-varying characteristics. In the weighted analyses, weights were the number of appearances in the analysis (implemented with a dataset having only one record per person).</p> <p>† According to Geisinger's primary care provider lists.</p> <p>‡ Quartile cutoffs were defined within the three time periods; the range of values for Q1, Q2, Q3, and Q4 were -18.33 to -1.96; -1.99 to -0.015; 0.005 to 2.05; and 2.11 to 12.4.</p> <p>§ The range of values in T1, T2, and T3 were 0.07 to 0.627, 0.63 to 0.756, and 0.76 to 0.94, respectively.</p> |             |               |          |

**Table 2.** Adjusted\* associations of community and community feature variables **from separate models** with new onset type 2 diabetes status.

| Variable                                                              | OR (95% CI)       |
|-----------------------------------------------------------------------|-------------------|
| <b>Community types</b>                                                |                   |
| <b>Model 1: Administrative community type</b>                         |                   |
| Township                                                              | 1.0               |
| Borough                                                               | 1.10 (1.04, 1.16) |
| City census tract                                                     | 1.34 (1.25, 1.44) |
| <b>Model 2: Residential location, urban/rural</b>                     |                   |
| Rural                                                                 | 1.0               |
| Urbanized area                                                        | 1.14 (1.08, 1.21) |
| Urban cluster                                                         | 1.04 (0.98, 1.11) |
| <b>Model 3: Combined location†</b>                                    |                   |
| TS/rural                                                              | 1.0               |
| TS/UC                                                                 | 1.00 (0.92, 1.08) |
| TS/UA                                                                 | 1.06 (0.98, 1.16) |
| B+CCT/rural                                                           | 1.04 (0.95, 1.15) |
| B/UC                                                                  | 1.09 (1.01, 1.18) |
| B/UA                                                                  | 1.15 (1.06, 1.25) |
| CCT/UC                                                                | 1.41 (1.22, 1.62) |
| CCT/UA                                                                | 1.33 (1.22, 1.45) |
| <b>Model 4: County ‡</b>                                              |                   |
| Luzerne                                                               | 1.0               |
| Blair                                                                 | 0.73 (0.57, 0.95) |
| Centre                                                                | 0.84 (0.75, 0.94) |
| Juniata                                                               | 1.19 (1.00, 1.40) |
| Lackawanna                                                            | 1.19 (1.07, 1.31) |
| Lebanon                                                               | 0.39 (0.16, 0.93) |
| Monroe                                                                | 0.78 (0.69, 0.88) |
| Schuylkill                                                            | 0.85 (0.78, 0.92) |
| Sullivan                                                              | 0.60 (0.45, 0.81) |
| Union                                                                 | 0.77 (0.64, 0.93) |
| <b>Community features, all communities combined</b>                   |                   |
| <b>Model 5: community socioeconomic deprivation, quartiles §</b>      |                   |
| 1                                                                     | 0.82 (0.76, 0.88) |
| 2                                                                     | 0.87 (0.81, 0.93) |
| 3                                                                     | 0.89 (0.83, 0.96) |
| 4                                                                     | 1.0               |
| <b>Model 6: greenness (normalized difference vegetation index)   </b> |                   |
| 1                                                                     | 1.0               |
| 2                                                                     | 0.88 (0.85, 0.93) |
| 3                                                                     | 0.84 (0.80, 0.88) |

1  
2  
3 \* Logistic regression models using generalized estimating equations with robust  
4 standard errors; one community or community feature variable was in the model at  
5 a time; models adjusted for sex, race (white vs. non-white), ethnicity (Hispanic vs.  
6 non-Hispanic), age (age, age<sup>2</sup>, age<sup>3</sup>), and Medical Assistance status.  
7 † This is a combination of administrative community type and residential location  
8 (urban/rural); TS = township, B = borough, CCT = city census tract, UA = urbanized  
9 area, UC = urban cluster; the few persons in CCT/rural were combined with B/rural.  
10 ‡ Only counties with confidence interval excluding 1.0 are shown in table. Luzerne  
11 County was selected as the reference group because it is the most populous  
12 county in the study region.  
13 § Quartile cutoffs were defined within the three time periods; the range of values for  
14 persons in Q1, Q2, Q3, and Q4 were -25.06 to -1.82; -1.99 to 0.10; 0.005 to 2.05;  
15 and 1.89 to 12.4, respectively.  
16 || The range of values in T1, T2, and T3 were 0.07 to 0.627, 0.63 to 0.756, and 0.76  
17 to 0.94, respectively.  
18  
19  
20  
21  
22  
23  
24  
25  
26  
27  
28  
29  
30  
31  
32  
33  
34  
35  
36  
37  
38  
39  
40  
41  
42  
43  
44  
45  
46  
47  
48  
49  
50  
51  
52  
53  
54  
55  
56  
57  
58  
59  
60

## Figure Captions

**Figure 1.** Distribution of study individuals and administrative community types by county in study region. The bolded number is the number of individuals; T, B, and C identify the number of townships, boroughs, and city census tracts within each county that were included in the analysis.

**Figure 2.** Areas along the Susquehanna River in Lycoming County, Pennsylvania from Williamsport (city) and South Williamsport (borough) to Montoursville (borough), Muncy (borough), and Montgomery (borough), showing relations between administrative community types (townships, boroughs, and city census tracts) and urbanized areas, urban clusters, and rural areas. Both sets of these administrative boundaries were used in the analysis.

1  
2  
3  
4  
5  
6  
7  
8  
9  
10  
11  
12  
13  
14  
15  
16  
17  
18  
19  
20  
21  
22  
23  
24  
25  
26  
27  
28  
29  
30  
31  
32  
33  
34  
35  
36  
37  
38  
39  
40  
41  
42  
43  
44  
45  
46  
47  
48  
49  
50  
51  
52  
53  
54  
55  
56  
57  
58  
59  
60

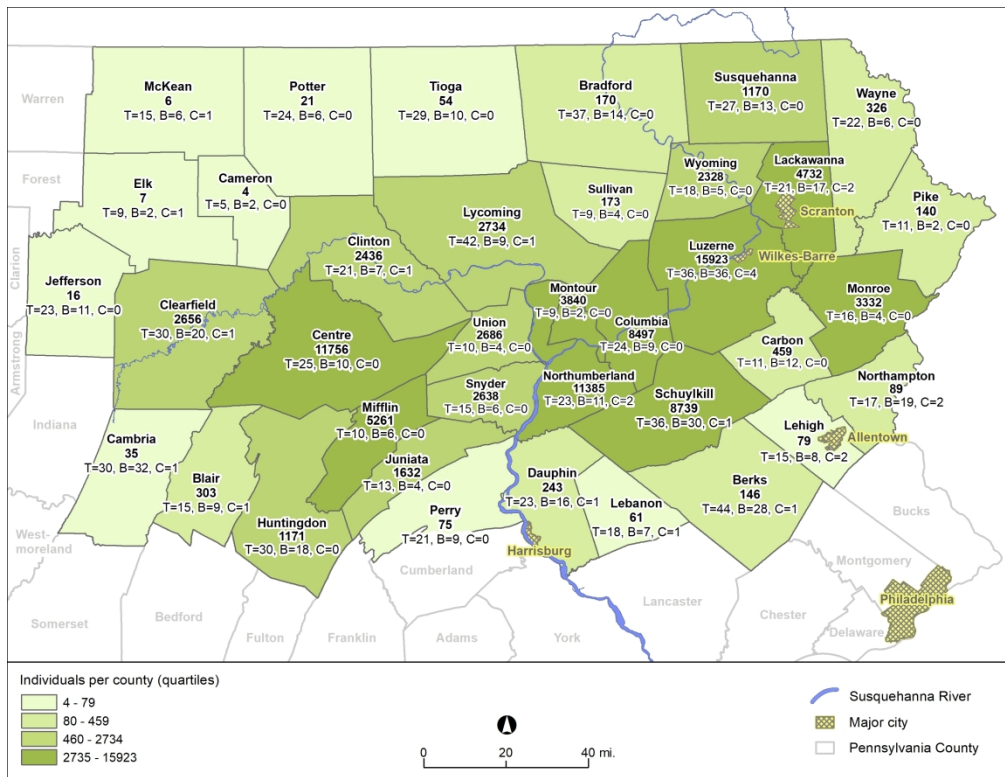

279x215mm (300 x 300 DPI)

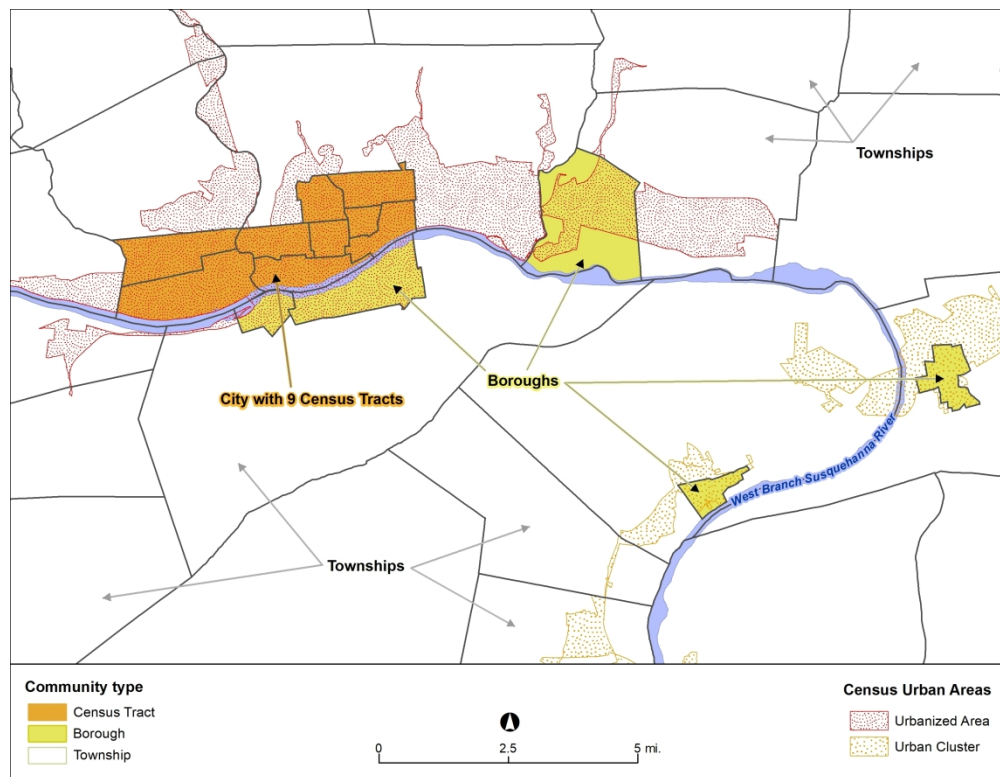

279x215mm (300 x 300 DPI)

## Online Supplement

**Table S1.** Diabetes case finding using EHR data.

**Must meet at least one of the following criteria:**

1. At least two separate encounter dates (inpatient, outpatient, emergency department) with type 2 diabetes diagnosis codes (ICD-9, ICD-10, or electronic diagnosis group [EDG]).
    - a. Excluded if had  $\geq 10$  years of type 1 diagnoses and  $<$  five years with type 2 diagnoses.
    - b. Excluded if  $< 10$  years of age at first diabetes diagnosis.
  2. At least one diabetes medication order, other than metformin or acarbose if female. Metformin combination medications were included.
    - a. Excluded if first diabetes medication order was prior to age 10 years.
  3. At least one encounter with type 2 diabetes diagnosis and an abnormal laboratory value (random glucose  $\geq 200$  mg/dl; fasting glucose  $\geq 126$  mg/dl; or hemoglobin A1c  $\geq 6.5\%$ ).
    - a. Excluded if had  $\geq 10$  years of type 1 diagnoses and  $<$  five years with type 2 diagnoses.
- The date of onset was assigned as the earliest date with any evidence of diabetes (e.g., had generic diabetes diagnoses that were not used for definition #1, or had abnormal laboratory value that was not accompanied by a diagnosis so did not meet definition #3).

**Notes:**

- a) To meet criteria #2 or #3, criterion had to occur  $> 9$  months prior to or  $> 1$  month after delivery of child (to avoid gestational diabetes). Gestational diabetes was not an exclusion if the individual subsequently developed type 2 diabetes. Date of onset was assigned as when the person met the type 2 diabetes criterion; and
- b) EDG codes are used in Epic EHR software (Epic Systems Corporation, Verona, WI) and often have higher specificity and greater detail.
- c) Of the 15,888 diabetes cases: 11,944 met criterion 1; 10,183 met criterion 2; 12,552 met criterion 3; 7008 met all three; and 4775 met at least two.
- d) Because metformin can be used for pre-diabetes, we evaluated how many persons could have had this diagnosis instead of diabetes in our diabetes onset definition. Of the 1579 men who met only definition #2, between 544 (3.4%) and 1207 (7.6%) may have had pre-diabetes instead of diabetes, depending on how longitudinal information on diagnoses, medications, medication indications, and abnormal laboratory results were used and interpreted.

**Table S2.** Selected characteristics of study individuals and communities by administrative community type.

| Variables                                                                                   | Borough         | Census Tract    | Township      |
|---------------------------------------------------------------------------------------------|-----------------|-----------------|---------------|
| <b>By community type (n = 1070 communities)</b>                                             |                 |                 |               |
| Number (%), total                                                                           | 291 (27.2)      | 146 (13.6)      | 633 (59.2)    |
| Number (%), among cases                                                                     | 224 (27.6)      | 107 (13.2)      | 482 (59.3)    |
| Number (%), among controls                                                                  | 278 (26.9)      | 137 (13.2)      | 620 (59.9)    |
| Counties with at least one resident in community type, n                                    | 35              | 16              | 37            |
| Counties with at least 20 residents in community type, n                                    | 27              | 9               | 32            |
| <b>Community measures, by community type (n = 1070 communities)</b>                         |                 |                 |               |
| Area, square miles, mean (SD)                                                               | 1.72 (2.32)     | 1.20 (3.52)     | 29.4 (18.1)   |
| Community socioeconomic deprivation, mean (SD)                                              | -0.09 (2.99)    | 4.17 (3.80)     | -1.15 (2.71)  |
| Population density, persons per square mile, mean (SD)                                      | 2094.7 (1642.3) | 6594.5 (5014.6) | 157.5 (279.4) |
| Developed land, % (SD)                                                                      | 37.2 (22.6)     | 72.6 (23.0)     | 3.66 (7.35)   |
| Intersection density per square mile, mean (SD)                                             | 120.6 (86.1)    | 208.5 (117.0)   | 13.34 (14.77) |
| <b>By participant (n = 95,323 individuals)</b>                                              |                 |                 |               |
| Cases, n (%) (total = 15,888)                                                               | 4621 (29.1)     | 1806 (11.4)     | 9461 (59.5)   |
| Controls, n (%) (total = 79,435)                                                            | 21,756 (27.4)   | 6548 (8.2)      | 51,131 (64.4) |
| Age at diabetes onset or control selection date, years, mean (SD)                           | 54.4 (15.9)     | 52.7 (16.1)     | 55.3 (14.8)   |
| Sex, female, n (%)                                                                          | 13,329 (50.2)   | 4449 (53.3)     | 29,098 (48.0) |
| Race, white, n (%)                                                                          | 245,963 (98.4)  | 7873 (94.2)     | 59,460 (98.1) |
| Ethnicity, Hispanic, n (%)                                                                  | 353 (1.3)       | 430 (5.2)       | 680 (1.1)     |
| Body mass index, kg/m <sup>2</sup> , mean (SD)                                              | 30.6 (7.47)     | 30.9 (7.96)     | 30.3 (6.94)   |
| Medical Assistance, % of time, mean (SD)                                                    | 5.9 (17.9)      | 10.3 (23.2)     | 3.3 (13.5)    |
| Medical Assistance, ever*, n (%)                                                            | 3311 (12.6)     | 1692 (20.3)     | 4311 (7.1)    |
| Contact with health system <u>before</u> diagnosis/control selection date, years, mean (SD) | 12.7 (4.37)     | 12.1 (4.57)     | 12.9 (4.34)   |
| Charlson index, mean (SD)                                                                   | 1.75 (1.83)     | 1.64 (1.78)     | 1.76 (1.78)   |
| Greenness, peak NDVI, in buffer, mean (SD)                                                  | 0.61 (0.11)     | 0.51 (0.10)     | 0.73 (0.10)   |
| Urban status by UA and UC boundaries, col %                                                 |                 |                 |               |
| Rural                                                                                       | 11.5            | 0.1             | 63.5          |
| Urbanized area (UA)                                                                         | 43.3            | 64.8            | 19.0          |
| Urban cluster (UC)                                                                          | 45.3            | 35.1            | 17.5          |
| Abbreviations: NDVI = normalized difference vegetation index; SD = standard deviation.      |                 |                 |               |
| * At least one encounter that used Medical Assistance for health insurance.                 |                 |                 |               |



**Table S3.** Mean outpatient encounters among cases and controls by community type and Medical Assistance status.

| Variable                                                                                                  | Cases, n = 15,888    |                                      |                       | Controls, n = 79,435   |                                   |                         |
|-----------------------------------------------------------------------------------------------------------|----------------------|--------------------------------------|-----------------------|------------------------|-----------------------------------|-------------------------|
|                                                                                                           | Boroughs<br>n = 4621 | City<br>Census<br>Tracts<br>n = 1806 | Townships<br>n = 9461 | Boroughs<br>n = 21,756 | City Census<br>Tracts<br>n = 6548 | Townships<br>n = 51,131 |
| Outpatient encounters, total before diagnosis, mean (SD)                                                  | 35.9 (34.8)          | 31.6 (32.1)                          | 36.8 (35.2)           | 35.7 (33.8)            | 33.5 (32.8)                       | 35.2 (31.8)             |
| Outpatient encounters before diagnosis, mean (SD), <u>by Medical Assistance status</u> (% time receiving) |                      |                                      |                       |                        |                                   |                         |
| 0%                                                                                                        | 35.2 (33.9)          | 30.9 (31.2)                          | 36.3 (34.6)           | 35.1 (33.1)            | 32.9 (32.1)                       | 35.0 (31.7)             |
| 0.1-24.9%                                                                                                 | 47.7 (41.3)          | 41.8 (44.3)                          | 44.7 (39.0)           | 44.2 (40.7)            | 40.0 (39.9)                       | 42.6 (36.1)             |
| 25.0-74.9%                                                                                                | 32.5 (34.5)          | 29.3 (25.4)                          | 37.1 (40.2)           | 37.3 (36.8)            | 33.6 (32.4)                       | 34.2 (31.4)             |
| 75+%                                                                                                      | 30.6 (28.9)          | 34.2 (21.0)                          | 30.7 (28.0)           | 27.7 (28.5)            | 27.9 (28.4)                       | 27.7 (22.6)             |
| SD = standard deviation                                                                                   |                      |                                      |                       |                        |                                   |                         |

### Medical Profile of Cases and Controls

To evaluate our categorization of diabetes cases and controls, we examined a number of biomarkers and other measures of relevance to diabetes, dysglycemia, and other cardio-metabolic risk factors development that were available in the EHR, including hemoglobin A1c (HbA1c), lipids (cholesterol and triglycerides), blood glucose (fasting and unspecified), and body mass index (BMI) (**Online Supplement Table S4**). Fasting blood glucose was measured in the year before the diabetes onset or control dates in 24% of cases and 29% of controls. Interestingly, the mean value was higher in the year before diagnosis in persons who would develop diabetes compared to those who would not, 108.5 vs. 95.8 mg/dL ( $p < 0.001$ ). In the year after diagnosis or control dates, fasting blood glucose was available in 58% of cases and 30% of controls, and mean levels were much higher in cases compared to controls (147.9 vs. 95.9,  $p < 0.001$ ). HbA1c, triglycerides, unspecified blood glucose, and BMI all evidenced similar patterns (**Online Supplement Table S4**). In the year before and after diagnosis, most cases and controls had BMI measured, with a much higher mean in cases compared to controls before and after diagnosis.

**Table S4.** Selected laboratory and other biometric values comparing new onset type 2 diabetes cases and controls without diabetes.

| Variable                                                                                           | Cases         | Controls      |
|----------------------------------------------------------------------------------------------------|---------------|---------------|
| Number                                                                                             | 15,888        | 79,435        |
| <b>Hemoglobin A1c (HbA1c)</b>                                                                      |               |               |
| # in year <u>before</u> diagnosis or control selection date per person, number of persons (%) with |               |               |
| 0 values                                                                                           | 13,618 (85.7) | 75,731 (95.3) |
| 1 value                                                                                            | 1801 (11.3)   | 3257 (4.1)    |
| 2+ values                                                                                          | 469 (3.0)     | 447 (0.6)     |
| Closest value in year <u>prior</u> to diagnosis or index date                                      |               |               |
| Persons with value, n (%)                                                                          | 2270 (14.3)   | 3704 (4.7)    |
| HbA1c %, mean (SD)                                                                                 | 5.9 (0.4)     | 5.6 (0.4)     |
| Closest value in year <u>after</u> diagnosis or index date                                         |               |               |
| Persons with value, n (%)                                                                          | 11,990 (75.5) | 3839 (4.8)    |
| HbA1c %, mean (SD)                                                                                 | 7.5 (2.0)     | 5.6 (0.4)     |
| <b>LDL cholesterol</b>                                                                             |               |               |
| # in year <u>before</u> diagnosis or index date per person, number of persons (%) with             |               |               |
| 0 values                                                                                           | 10,155 (63.9) | 46,485 (58.5) |
| 1 value                                                                                            | 4068 (25.6)   | 23,737 (29.9) |
| 2+ values                                                                                          | 1665 (10.5)   | 9213 (11.6)   |
| Closest value in year <u>prior</u> to diagnosis or index date                                      |               |               |
| Persons with value, n (%)                                                                          | 5733 (36.1)   | 32,950 (41.5) |
| LDL-cholesterol, mg/dL, mean (SD)                                                                  | 107.2 (35.6)  | 109.6 (33.0)  |
| Closest value in year <u>after</u> diagnosis or index date                                         |               |               |
| Persons with value, n (%)                                                                          | 11,726 (73.8) | 34,223 (43.1) |
| LDL-cholesterol, mg/dL, mean (SD)                                                                  | 108.5 (36.7)  | 111.1 (33.7)  |
| <b>Triglycerides</b>                                                                               |               |               |
| # in year <u>before</u> diagnosis or index date per person, number of persons (%) with             |               |               |
| 0 values                                                                                           | 10,529 (66.3) | 48,714 (61.3) |
| 1 value                                                                                            | 3869 (24.4)   | 22,585 (28.4) |
| 2+ values                                                                                          | 1490 (9.4)    | 8136 (10.2)   |
| Closest value in year <u>prior</u> to diagnosis or index date                                      |               |               |
| Persons with value, n (%)                                                                          | 5359 (33.7)   | 30,721 (38.7) |
| Triglycerides, mg/dL, mean (SD)                                                                    | 188.7 (131.7) | 133.7 (81.2)  |
| Closest value in year <u>after</u> diagnosis or index date                                         |               |               |
| Persons with value, n (%)                                                                          | 11,207 (70.5) | 31,663 (39.9) |
| Triglycerides, mg/dL, mean (SD)                                                                    | 216.5 (244.8) | 135.0 (86.8)  |
| <b>Glucose, fasting</b>                                                                            |               |               |
| # in year <u>before</u> diagnosis or index date per person, # of persons (%) with                  |               |               |
| 0 values                                                                                           | 12,139 (76.4) | 56,198 (70.8) |
| 1 value                                                                                            | 2968 (18.7)   | 19,023 (24.0) |
| 2+ values                                                                                          | 781 (5.0)     | 4214 (5.3)    |

| Variable                                                                       | Cases         | Controls      |
|--------------------------------------------------------------------------------|---------------|---------------|
| Closest value in year <u>prior</u> to diagnosis or index date                  |               |               |
| Persons with value, n (%)                                                      | 3749 (23.6)   | 23,237 (29.3) |
| Glucose, mg/dL, mean (SD)                                                      | 108.5 (11.8)  | 95.8 (9.3)    |
| Closest value in year <u>after</u> diagnosis or index date                     |               |               |
| Persons with value, n (%)                                                      | 9259 (58.3)   | 24,105 (30.3) |
| Glucose, mg/dL, mean (SD)                                                      | 147.9 (60.9)  | 95.9 (9.3)    |
| <b>Glucose, unspecified</b>                                                    |               |               |
| # in year <u>before</u> diagnosis or index date per person, # persons (%) with |               |               |
| 0 values                                                                       | 9913 (62.4)   | 54,258 (68.3) |
| 1 value                                                                        | 3115 (19.6)   | 15,293 (19.3) |
| 2+ values                                                                      | 2860 (18.0)   | 9884 (12.4)   |
| Closest value in year <u>prior</u> to diagnosis or index date                  |               |               |
| Persons with value, n (%)                                                      | 5975 (37.6)   | 25,177 (31.7) |
| Glucose, mg/dL, mean (SD)                                                      | 124.6 (28.2)  | 97.7 (15.5)   |
| Closest value in year <u>after</u> diagnosis or index date                     |               |               |
| Persons with value, n (%)                                                      | 10,833 (68.2) | 27,779 (35.0) |
| Glucose, mg/dL, mean (SD)                                                      | 170.7 (95.2)  | 98.4 (16.5)   |
| <b>Body mass index (BMI)</b>                                                   |               |               |
| # in year <u>before</u> diagnosis or index date per person, mean (SD)          | 3.1 (4.1)     | 2.4 (3.2)     |
| Closest value in year <u>prior</u> to diagnosis or index date                  |               |               |
| Persons with value, n (%)                                                      | 11,237 (70.7) | 54,733 (68.9) |
| BMI, kg/m <sup>2</sup> , mean (SD)                                             | 36.2 (8.4)    | 29.3 (6.4)    |
| Closest value in year <u>after</u> diagnosis or index date                     |               |               |
| Persons with value, n (%)                                                      | 13,957 (87.9) | 65,084 (81.9) |
| BMI, kg/m <sup>2</sup> , mean (SD)                                             | 36.0 (8.4)    | 29.3 (6.4)    |

**Table S5.** Adjusted\* associations of selected independent variables with type 2 diabetes status stratified by administrative community type.

| Variable                                                                                                                                                                                                                                                                                                                                                                                                                                                                                                                                                                                                                                 | Stratified by Administrative Community Type |                         |                         | Stratified by Administrative Community Type |                         |                         |
|------------------------------------------------------------------------------------------------------------------------------------------------------------------------------------------------------------------------------------------------------------------------------------------------------------------------------------------------------------------------------------------------------------------------------------------------------------------------------------------------------------------------------------------------------------------------------------------------------------------------------------------|---------------------------------------------|-------------------------|-------------------------|---------------------------------------------|-------------------------|-------------------------|
|                                                                                                                                                                                                                                                                                                                                                                                                                                                                                                                                                                                                                                          | Boroughs                                    | City Census Tracts      | Townships               | Boroughs                                    | City Census Tracts      | Townships               |
|                                                                                                                                                                                                                                                                                                                                                                                                                                                                                                                                                                                                                                          | Model 1a<br>OR (95% CI)                     | Model 1b<br>OR (95% CI) | Model 1c<br>OR (95% CI) | Model 2a<br>OR (95% CI)                     | Model 2b<br>OR (95% CI) | Model 2c<br>OR (95% CI) |
| Race                                                                                                                                                                                                                                                                                                                                                                                                                                                                                                                                                                                                                                     |                                             |                         |                         |                                             |                         |                         |
| White                                                                                                                                                                                                                                                                                                                                                                                                                                                                                                                                                                                                                                    | 1.0                                         | 1.0                     | 1.0                     | 1.0                                         | 1.0                     | 1.0                     |
| All others                                                                                                                                                                                                                                                                                                                                                                                                                                                                                                                                                                                                                               | 1.44 (1.12, 1.94)                           | 1.30 (1.05, 1.60)       | 1.36 (1.14, 1.61)       | 1.43 (1.12, 1.84)                           | 1.28 (1.04, 1.58)       | 1.35 (1.14, 1.61)       |
| Ethnicity                                                                                                                                                                                                                                                                                                                                                                                                                                                                                                                                                                                                                                |                                             |                         |                         |                                             |                         |                         |
| Non-Hispanic                                                                                                                                                                                                                                                                                                                                                                                                                                                                                                                                                                                                                             | 1.0                                         | 1.0                     | 1.0                     | 1.0                                         | 1.0                     | 1.0                     |
| Hispanic                                                                                                                                                                                                                                                                                                                                                                                                                                                                                                                                                                                                                                 | 1.50 (1.16, 1.94)                           | 1.33 (1.02, 1.72)       | 1.52 (1.16, 1.97)       | 1.50 (1.16, 1.94)                           | 1.32 (1.02, 1.71)       | 1.52 (1.17, 1.97)       |
| Medical Assistance                                                                                                                                                                                                                                                                                                                                                                                                                                                                                                                                                                                                                       |                                             |                         |                         |                                             |                         |                         |
| < 50% of time                                                                                                                                                                                                                                                                                                                                                                                                                                                                                                                                                                                                                            | 1.0                                         | 1.0                     | 1.0                     | 1.0                                         | 1.0                     | 1.0                     |
| 50+% of time                                                                                                                                                                                                                                                                                                                                                                                                                                                                                                                                                                                                                             | 1.66 (1.47, 1.86)                           | 1.46 (1.26, 1.70)       | 1.83 (1.61, 2.09)       | 1.66 (1.48, 1.86)                           | 1.48 (1.27, 1.72)       | 1.83 (1.61, 2.09)       |
| CSD **                                                                                                                                                                                                                                                                                                                                                                                                                                                                                                                                                                                                                                   |                                             |                         |                         |                                             |                         |                         |
| Q1                                                                                                                                                                                                                                                                                                                                                                                                                                                                                                                                                                                                                                       | 0.88 (0.77, 1.01)                           | 0.75 (0.56, 1.00)       | 0.93 (0.84, 1.02)       |                                             |                         |                         |
| Q2                                                                                                                                                                                                                                                                                                                                                                                                                                                                                                                                                                                                                                       | 0.96 (0.84, 1.08)                           | 0.77 (0.63, 0.94)       | 0.97 (0.89, 1.06)       |                                             |                         |                         |
| Q3                                                                                                                                                                                                                                                                                                                                                                                                                                                                                                                                                                                                                                       | 0.98 (0.87, 1.10)                           | 0.78 (0.67, 0.91)       | 0.98 (0.89, 1.07)       |                                             |                         |                         |
| Q4                                                                                                                                                                                                                                                                                                                                                                                                                                                                                                                                                                                                                                       | 1.0                                         | 1.0                     | 1.0                     |                                             |                         |                         |
| NDVI, 1250x1250m †                                                                                                                                                                                                                                                                                                                                                                                                                                                                                                                                                                                                                       |                                             |                         |                         |                                             |                         |                         |
| T1                                                                                                                                                                                                                                                                                                                                                                                                                                                                                                                                                                                                                                       |                                             |                         |                         | 1.0                                         | 1.0                     | 1.0                     |
| T2                                                                                                                                                                                                                                                                                                                                                                                                                                                                                                                                                                                                                                       |                                             |                         |                         | 0.93 (0.87, 0.99)                           | 0.76 (0.64, 0.90)       | 0.93 (0.87, 0.99)       |
| T3                                                                                                                                                                                                                                                                                                                                                                                                                                                                                                                                                                                                                                       |                                             |                         |                         | 0.85 (0.76, 0.96)                           | 0.76 (0.50, 1.17)       | 0.90 (0.84, 0.96)       |
| <p><b>Abbreviations:</b> CSD = community socioeconomic deprivation; NDVI = normalized difference vegetation index;</p> <p>* Logistic regression models using generalized estimating equations with robust standard errors; also adjusted for sex and age (age, age<sup>2</sup>, age<sup>3</sup>).</p> <p>** Quartile cutoffs were defined within the three time periods; the range of values for persons in Q1, Q2, Q3, and Q4 were -25.06 to -1.82; -1.99 to 0.10; 0.005 to 2.05; and 1.89 to 12.4, respectively.</p> <p>† The range of values in T1, T2, and T3 were 0.07 to 0.627, 0.63 to 0.756, and 0.76 to 0.94, respectively.</p> |                                             |                         |                         |                                             |                         |                         |

**Table S6.** Adjusted\* associations of selected independent variables with type 2 diabetes status stratified by administrative community type with county and community socioeconomic deprivation **OR** greenness.

| Variable                                                                                                                                                                                                                                                                                                                                                                  | Stratified by Administrative Community Type |                          |                          |
|---------------------------------------------------------------------------------------------------------------------------------------------------------------------------------------------------------------------------------------------------------------------------------------------------------------------------------------------------------------------------|---------------------------------------------|--------------------------|--------------------------|
|                                                                                                                                                                                                                                                                                                                                                                           | Boroughs                                    | City Census Tracts       | Townships                |
|                                                                                                                                                                                                                                                                                                                                                                           | Model 1<br>OR (95% CI)                      | Model 1<br>OR (95% CI)   | Model 1<br>OR (95% CI)   |
| <b>Model 1 – with county and community socioeconomic deprivation (CSD)</b>                                                                                                                                                                                                                                                                                                |                                             |                          |                          |
| Race                                                                                                                                                                                                                                                                                                                                                                      |                                             |                          |                          |
| White                                                                                                                                                                                                                                                                                                                                                                     | 1.0                                         | 1.0                      | 1.0                      |
| All others                                                                                                                                                                                                                                                                                                                                                                | 1.45 (1.13, 1.86)                           | 1.31 (1.06, 1.62)        | 1.39 (1.16, 1.66)        |
| Ethnicity                                                                                                                                                                                                                                                                                                                                                                 |                                             |                          |                          |
| Non-Hispanic                                                                                                                                                                                                                                                                                                                                                              | 1.0                                         | 1.0                      | 1.0                      |
| Hispanic                                                                                                                                                                                                                                                                                                                                                                  | 1.49 (1.15, 1.92)                           | 1.32 (1.02, 1.71)        | 1.55 (1.18, 2.04)        |
| Medical Assistance                                                                                                                                                                                                                                                                                                                                                        |                                             |                          |                          |
| < 50% of time                                                                                                                                                                                                                                                                                                                                                             | 1.0                                         | 1.0                      | 1.0                      |
| 50+% of time                                                                                                                                                                                                                                                                                                                                                              | 1.66 (1.47, 1.87)                           | 1.48 (1.28, 1.72)        | 1.85 (1.62, 2.11)        |
| Community socioeconomic deprivation, quartiles                                                                                                                                                                                                                                                                                                                            |                                             |                          |                          |
| Q1                                                                                                                                                                                                                                                                                                                                                                        | 0.87 (0.76, 0.996)                          | 0.71 (0.52, 0.95)        | 0.91 (0.82, 0.99)        |
| Q2                                                                                                                                                                                                                                                                                                                                                                        | 0.93 (0.83, 1.06)                           | 0.78 (0.65, 0.95)        | 0.96 (0.88, 1.05)        |
| Q3                                                                                                                                                                                                                                                                                                                                                                        | 0.97 (0.87, 1.09)                           | 0.79 (0.67, 0.93)        | 0.98 (0.90, 1.07)        |
| Q4                                                                                                                                                                                                                                                                                                                                                                        | 1.0                                         | 1.0                      | 1.0                      |
| County                                                                                                                                                                                                                                                                                                                                                                    |                                             |                          |                          |
| Luzerne                                                                                                                                                                                                                                                                                                                                                                   | 1.0                                         | 1.0                      | 1.0                      |
| Blair                                                                                                                                                                                                                                                                                                                                                                     | <b>0.64</b> (0.51, 0.81)                    | 0.62 (0.23, 1.64)        | 0.86 (0.61, 1.21)        |
| Clearfield                                                                                                                                                                                                                                                                                                                                                                | 1.00 (0.82, 1.24)                           | <b>0.76</b> (0.66, 0.87) | 0.97 (0.82, 1.15)        |
| Dauphin                                                                                                                                                                                                                                                                                                                                                                   | 0.90 (0.56, 1.45)                           | <b>2.81</b> (1.47, 5.37) | 1.43 (0.96, 2.15)        |
| Juniata                                                                                                                                                                                                                                                                                                                                                                   | <b>1.68</b> (1.22, 2.31)                    | NA†                      | 1.18 (0.99, 1.41)        |
| Lackawanna                                                                                                                                                                                                                                                                                                                                                                | 1.12 (0.96, 1.37)                           | <b>1.23</b> (1.06, 1.43) | 1.13 (0.93, 1.38)        |
| Lehigh                                                                                                                                                                                                                                                                                                                                                                    | <b>18.2</b> (2.00, 165.1)                   | 2.00 (0.85, 4.68)        | 0.66 (0.26, 1.65)        |
| Mifflin                                                                                                                                                                                                                                                                                                                                                                   | <b>1.20</b> (1.00, 1.43)                    | NA                       | 1.06 (0.93, 1.21)        |
| Monroe                                                                                                                                                                                                                                                                                                                                                                    | <b>0.73</b> (0.59, 0.91)                    | NA                       | <b>0.85</b> (0.74, 0.98) |
| Perry                                                                                                                                                                                                                                                                                                                                                                     | <b>3.16</b> (1.34, 7.47)                    | NA                       | 0.96 (0.51, 1.83)        |
| Potter                                                                                                                                                                                                                                                                                                                                                                    | <b>4.90</b> (4.42, 5.43)                    | NA                       | 0.71 (0.15, 3.31)        |
| Schuylkill                                                                                                                                                                                                                                                                                                                                                                | 0.91 (0.80, 1.02)                           | 0.93 (0.80, 1.07)        | <b>0.82</b> (0.73, 0.91) |
| Snyder                                                                                                                                                                                                                                                                                                                                                                    | <b>0.84</b> (0.72, 0.98)                    | NA                       | 1.01 (0.88, 1.16)        |
| Sullivan                                                                                                                                                                                                                                                                                                                                                                  | 0.63 (0.38, 1.07)                           | NA                       | <b>0.65</b> (0.47, 0.90) |
| Union                                                                                                                                                                                                                                                                                                                                                                     | 0.84 (0.53, 1.34)                           | NA                       | <b>0.80</b> (0.66, 0.98) |
| Wayne                                                                                                                                                                                                                                                                                                                                                                     | <b>3.36</b> (1.83, 6.16)                    | NA                       | 0.96 (0.59, 1.58)        |
| Wyoming                                                                                                                                                                                                                                                                                                                                                                   | <b>0.86</b> (0.76, 0.96)                    | NA                       | <b>1.15</b> (1.00, 1.32) |
| <b>Model 2 – same as Model 1, but with NDVI not CSD, with county; only NDVI associations are shown</b>                                                                                                                                                                                                                                                                    |                                             |                          |                          |
| Normalized difference vegetation index (NDVI)                                                                                                                                                                                                                                                                                                                             |                                             |                          |                          |
| T1                                                                                                                                                                                                                                                                                                                                                                        | 1.0                                         | 1.0                      | 1.0                      |
| T2                                                                                                                                                                                                                                                                                                                                                                        | 0.91 (0.85, 0.98)                           | 0.77 (0.64, 0.92)        | 0.93 (0.87, 0.99)        |
| T3                                                                                                                                                                                                                                                                                                                                                                        | 0.85 (0.75, 0.97)                           | 0.76 (0.48, 1.19)        | 0.90 (0.84, 0.97)        |
| * Logistic regression models using generalized estimating equations with robust standard errors; also adjusted for sex and age (age, age <sup>2</sup> , age <sup>3</sup> ). Counties with at least one association that excluded 1.0 in confidence interval included in table (37 counties were included in total; 36 county indicators vs. Luzerne County as reference). |                                             |                          |                          |
| † NA = these counties did not have city minor civil divisions or did not converge due to small numbers.                                                                                                                                                                                                                                                                   |                                             |                          |                          |

1  
2  
3  
4  
5  
6  
7  
8  
9  
10  
11  
12  
13  
14  
15  
16  
17  
18  
19  
20  
21  
22  
23  
24  
25  
26  
27  
28  
29  
30  
31  
32  
33  
34  
35  
36  
37  
38  
39  
40  
41  
42  
43  
44  
45  
46  
47  
48  
49  
50  
51  
52  
53  
54  
55  
56  
57  
58  
59  
60STROBE Statement—Checklist of items that should be included in reports of *case-control studies*

|                              | Item No | Recommendation                                                                                                                                                                                    | Page No |
|------------------------------|---------|---------------------------------------------------------------------------------------------------------------------------------------------------------------------------------------------------|---------|
| <b>Title and abstract</b>    | 1       | (a) Indicate the study's design with a commonly used term in the title or the abstract                                                                                                            | 3       |
|                              |         | (b) Provide in the abstract an informative and balanced summary of what was done and what was found                                                                                               | 3       |
| <b>Introduction</b>          |         |                                                                                                                                                                                                   |         |
| Background/rationale         | 2       | Explain the scientific background and rationale for the investigation being reported                                                                                                              | 5-6     |
| Objectives                   | 3       | State specific objectives, including any prespecified hypotheses                                                                                                                                  | 6, 9    |
| <b>Methods</b>               |         |                                                                                                                                                                                                   |         |
| Study design                 | 4       | Present key elements of study design early in the paper                                                                                                                                           | 6, 7    |
| Setting                      | 5       | Describe the setting, locations, and relevant dates, including periods of recruitment, exposure, follow-up, and data collection                                                                   | 7       |
| Participants                 | 6       | (a) Give the eligibility criteria, and the sources and methods of case ascertainment and control selection. Give the rationale for the choice of cases and controls                               | 7, 8    |
|                              |         | (b) For matched studies, give matching criteria and the number of controls per case                                                                                                               | 7       |
| Variables                    | 7       | Clearly define all outcomes, exposures, predictors, potential confounders, and effect modifiers. Give diagnostic criteria, if applicable                                                          | 7-9     |
| Data sources/<br>measurement | 8*      | For each variable of interest, give sources of data and details of methods of assessment (measurement). Describe comparability of assessment methods if there is more than one group              | 7-9     |
| Bias                         | 9       | Describe any efforts to address potential sources of bias                                                                                                                                         | 9, 10   |
| Study size                   | 10      | Explain how the study size was arrived at                                                                                                                                                         | 7       |
| Quantitative variables       | 11      | Explain how quantitative variables were handled in the analyses. If applicable, describe which groupings were chosen and why                                                                      | 9, 10   |
| Statistical methods          | 12      | (a) Describe all statistical methods, including those used to control for confounding                                                                                                             | 9, 10   |
|                              |         | (b) Describe any methods used to examine subgroups and interactions                                                                                                                               | 9, 10   |
|                              |         | (c) Explain how missing data were addressed                                                                                                                                                       | 9, 10   |
|                              |         | (d) If applicable, explain how matching of cases and controls was addressed                                                                                                                       | 9, 10   |
|                              |         | (e) Describe any sensitivity analyses                                                                                                                                                             | 9, 10   |
| <b>Results</b>               |         |                                                                                                                                                                                                   |         |
| Participants                 | 13*     | (a) Report numbers of individuals at each stage of study—eg numbers potentially eligible, examined for eligibility, confirmed eligible, included in the study, completing follow-up, and analysed | 7       |
|                              |         | (b) Give reasons for non-participation at each stage                                                                                                                                              | NA      |
|                              |         | (c) Consider use of a flow diagram                                                                                                                                                                | NA      |
| Descriptive data             | 14*     | (a) Give characteristics of study participants (eg demographic, clinical, social) and information on exposures and potential confounders                                                          | 21, 22  |
|                              |         | (b) Indicate number of participants with missing data for each variable of interest                                                                                                               | NA      |
| Outcome data                 | 15*     | Report numbers in each exposure category, or summary measures of exposure                                                                                                                         | 21, 22  |





# BMJ Open

## Association of community types and features in a case-control analysis of new onset type 2 diabetes across a diverse geography in Pennsylvania

|                                 |                                                                                                                                                                                                                                                                                                                                                                                                                                                                                                                                                                                                                                                                                                                                                                                                                                                                                                                                                                                                                                                                                                                        |
|---------------------------------|------------------------------------------------------------------------------------------------------------------------------------------------------------------------------------------------------------------------------------------------------------------------------------------------------------------------------------------------------------------------------------------------------------------------------------------------------------------------------------------------------------------------------------------------------------------------------------------------------------------------------------------------------------------------------------------------------------------------------------------------------------------------------------------------------------------------------------------------------------------------------------------------------------------------------------------------------------------------------------------------------------------------------------------------------------------------------------------------------------------------|
| Journal:                        | <i>BMJ Open</i>                                                                                                                                                                                                                                                                                                                                                                                                                                                                                                                                                                                                                                                                                                                                                                                                                                                                                                                                                                                                                                                                                                        |
| Manuscript ID                   | bmjopen-2020-043528.R1                                                                                                                                                                                                                                                                                                                                                                                                                                                                                                                                                                                                                                                                                                                                                                                                                                                                                                                                                                                                                                                                                                 |
| Article Type:                   | Original research                                                                                                                                                                                                                                                                                                                                                                                                                                                                                                                                                                                                                                                                                                                                                                                                                                                                                                                                                                                                                                                                                                      |
| Date Submitted by the Author:   | 17-Dec-2020                                                                                                                                                                                                                                                                                                                                                                                                                                                                                                                                                                                                                                                                                                                                                                                                                                                                                                                                                                                                                                                                                                            |
| Complete List of Authors:       | Schwartz, BS; Johns Hopkins University Bloomberg School of Public Health, Department of Environmental Health and Engineering<br>Pollak, Jonathan; Johns Hopkins University Bloomberg School of Public Health, Department of Environmental Health and Engineering<br>Poulsen, Melissa; Geisinger, Population Health Sciences<br>Bandeem-Roche, Karen; Johns Hopkins University Bloomberg School of Public Health, Biostatistics<br>Moon, Katherine; Johns Hopkins Bloomberg School of Public Health Center for Teaching and Learning, Environmental Health & Engineering<br>DeWalle, Joseph; Geisinger, Population Health Sciences<br>Siegel, Karen; Centers for Disease Control and Prevention, National Center for Chronic Disease Prevention and Health Promotion<br>Mercado, Carla; Centers for Disease Control and Prevention, National Center for Chronic Disease Prevention and Health Promotion<br>Imperatore, Giuseppina ; Centers for Disease Control and Prevention, Division of Diabetes Translation<br>Hirsch, Annemarie; Geisinger Health System, Department of Epidemiology and Health Services Research |
| <b>Primary Subject Heading</b>: | Diabetes and endocrinology                                                                                                                                                                                                                                                                                                                                                                                                                                                                                                                                                                                                                                                                                                                                                                                                                                                                                                                                                                                                                                                                                             |
| Secondary Subject Heading:      | Epidemiology                                                                                                                                                                                                                                                                                                                                                                                                                                                                                                                                                                                                                                                                                                                                                                                                                                                                                                                                                                                                                                                                                                           |
| Keywords:                       | DIABETES & ENDOCRINOLOGY, EPIDEMIOLOGY, PUBLIC HEALTH                                                                                                                                                                                                                                                                                                                                                                                                                                                                                                                                                                                                                                                                                                                                                                                                                                                                                                                                                                                                                                                                  |
|                                 |                                                                                                                                                                                                                                                                                                                                                                                                                                                                                                                                                                                                                                                                                                                                                                                                                                                                                                                                                                                                                                                                                                                        |

SCHOLARONE™  
Manuscripts



I, the Submitting Author has the right to grant and does grant on behalf of all authors of the Work (as defined in the below author licence), an exclusive licence and/or a non-exclusive licence for contributions from authors who are: i) UK Crown employees; ii) where BMJ has agreed a CC-BY licence shall apply, and/or iii) in accordance with the terms applicable for US Federal Government officers or employees acting as part of their official duties; on a worldwide, perpetual, irrevocable, royalty-free basis to BMJ Publishing Group Ltd ("BMJ") its licensees and where the relevant Journal is co-owned by BMJ to the co-owners of the Journal, to publish the Work in this journal and any other BMJ products and to exploit all rights, as set out in our [licence](#).

The Submitting Author accepts and understands that any supply made under these terms is made by BMJ to the Submitting Author unless you are acting as an employee on behalf of your employer or a postgraduate student of an affiliated institution which is paying any applicable article publishing charge ("APC") for Open Access articles. Where the Submitting Author wishes to make the Work available on an Open Access basis (and intends to pay the relevant APC), the terms of reuse of such Open Access shall be governed by a Creative Commons licence – details of these licences and which [Creative Commons](#) licence will apply to this Work are set out in our licence referred to above.

Other than as permitted in any relevant BMJ Author's Self Archiving Policies, I confirm this Work has not been accepted for publication elsewhere, is not being considered for publication elsewhere and does not duplicate material already published. I confirm all authors consent to publication of this Work and authorise the granting of this licence.

1  
2  
3 **1 Association of community types and features in a case-control analysis of new**  
4  
5 **2 onset type 2 diabetes across a diverse geography in Pennsylvania**  
6  
7

8 **3 Brian S. Schwartz,<sup>1,2,4,5</sup> Jonathan S. Pollak,<sup>1</sup> Melissa N. Poulsen,<sup>5</sup> Karen Bandeen-**  
9  
10 **4 Roche,<sup>3</sup> Katherine A. Moon,<sup>1</sup> Joseph DeWalle,<sup>5</sup> Karen R. Siegel,<sup>6</sup> Carla I. Mercado,<sup>6</sup>**  
11  
12 **5 Giuseppina Imperatore,<sup>6</sup> Annemarie G. Hirsch<sup>1,5</sup>**  
13

14  
15 **6 Johns Hopkins Bloomberg School of Public Health, Baltimore, MD**  
16

17 **7 <sup>1</sup> Department of Environmental Health and Engineering**  
18

19 **8 <sup>2</sup> Department of Epidemiology**  
20

21 **9 <sup>3</sup> Department of Biostatistics**  
22  
23

24 **10 Johns Hopkins School of Medicine, Baltimore, MD**  
25

26 **11 <sup>4</sup> Department of Medicine**  
27

28 **12 Geisinger, Danville, PA**  
29

30 **13 <sup>5</sup> Department of Population Health Sciences**  
31  
32

33 **14 Centers for Disease Control and Prevention, Atlanta, GA**  
34

35 **15 <sup>6</sup> Division of Diabetes Translation, National Center for Chronic Disease Prevention**  
36  
37 **16 and Health Promotion**  
38  
39

40 **17 Corresponding author:** Brian S. Schwartz, Department of Environmental Health and  
41  
42 **18 Engineering, 615 N. Wolfe Street, Room W7041, Baltimore, MD, 21205, voice 410-955-**  
43  
44 **19 4158, email [bschwar1@jhu.edu](mailto:bschwar1@jhu.edu).**  
45  
46

47 **20 Word count:** abstract = 287, manuscript = 3122 | **Tables and figures = 4 | Online**  
48  
49 **21 supplement tables = 6 | References = 35**  
50

51 **22 Running title:** Geography of type 2 diabetes in Pennsylvania  
52  
53  
54 **23**  
55  
56  
57  
58  
59  
60

1  
2  
3 **24 Abstract**  
4

5 **25 Objectives:** To evaluate associations of community types and features with new onset  
6  
7  
8 **26** type 2 diabetes in diverse communities. Understanding the location and scale of  
9  
10 **27** geographic disparities can lead to community-level interventions.

11  
12 **28 Design:** Nested case-control study within the open dynamic cohort of health system  
13  
14  
15 **29** patients.

16  
17 **30 Setting:** Large, integrated health system in 37 counties in central and northeastern  
18  
19 **31** Pennsylvania, USA.

20  
21 **32 Participants and analysis:** We used electronic health records to identify persons with  
22  
23  
24 **33** new-onset type 2 diabetes from 2008–2016 (n = 15,888). Persons with diabetes were  
25  
26 **34** age, sex, and year matched (1:5) to persons without diabetes (n = 79,435). We used  
27  
28 **35** generalized estimating equations to control for individual-level confounding variables,  
29  
30  
31 **36** accounting for clustering of persons within communities. Communities were defined as  
32  
33 **37** 1) townships, boroughs, and city census tracts; 2) urbanized area (large metro), urban  
34  
35 **38** cluster (small cities and towns), and rural; 3) combination of the first two; and 4) county.  
36  
37  
38 **39** Community socioeconomic deprivation and greenness were evaluated alone and in  
39  
40 **40** models stratified by community types.

41  
42 **41 Results:** Borough and city census tract residence (vs. townships) were associated (odds  
43  
44 **42** ratio [95% confidence interval]) with higher odds of type 2 diabetes (1.10 [1.04-1.16]  
45  
46 **43** and 1.34 [1.25-1.44], respectively). Urbanized areas (vs. rural) also had increased odds  
47  
48 **44** of type 2 diabetes (1.14 [1.08-1.21]). In the combined definition, the strongest  
49  
50  
51 **45** associations (vs. townships in rural areas) were city census tracts in urban clusters  
52  
53  
54 **46** (1.41 [1.22-1.62]) and city census tracts in urbanized areas (1.33 [1.22-1.45]). Higher  
55  
56  
57  
58  
59  
60

1  
2  
3 47 community socioeconomic deprivation and lower greenness were each associated with  
4  
5 48 increased odds.  
6

7  
8 49 Conclusions: Urban residence was associated with higher odds of type 2 diabetes than  
9  
10 50 for other areas. Higher community socioeconomic deprivation in city census tracts and  
11  
12 51 lower greenness in all community types were also associated with type 2 diabetes.  
13  
14

15 52

### 17 53 **Strengths and limitations of this study**

- 19 54 • Type 2 diabetes, with a large sample size, was objectively documented and verified  
20  
21 55 or excluded with extensive biomarker and medical data.  
22  
23
- 24 56 • Temporality was appropriate for all independent variables.  
25
- 26 57 • We studied several approaches to community characterization at more relevant  
27  
28 58 contextual scales than many prior studies in a range of communities from urban to  
29  
30 59 rural.  
31  
32
- 33 60 • We did not measure behavioral mediators of the community definitions and features,  
34  
35 61 such as physical activity or dietary intake.  
36  
37
- 38 62 • We could not account for residential selection bias, but the residential stability and  
39  
40 63 general population representativeness of our study population may mitigate these  
41  
42 64 concerns.  
43  
44

45 65

46 66

47 67  
48  
49  
50  
51  
52  
53  
54  
55  
56  
57  
58  
59  
60

## 68 INTRODUCTION

69 Diabetes is a common and costly chronic disease; in the U.S. in 2018, over 34  
70 million individuals had diabetes, with annual spending exceeding \$320 billion [1].

71 Diabetes occurrence varies by race/ethnicity and also evidences geographic disparities  
72 [2, 3]; prevalence by county in the U.S. varies over a 7-fold range [4]. Studies report that  
73 diabetes is 17% more prevalent in rural than urban areas [5], consistent with rural health  
74 disparities for other chronic conditions [6, 7], attributed to sociodemographic factors  
75 (e.g., higher poverty, older populations) and barriers to health care access [8, 9].

76 Community characteristics that may underlie observed geographic disparities in type  
77 2 diabetes include land use (e.g., walkable vs. automobile dependent), fitness, food,  
78 and social (e.g., deprivation, disorganization) environments; greenspace (i.e., natural  
79 environments); and air pollution. Some of these are diabetogenic and others protective  
80 [10-12]. Community characteristics co-occur in patterns that differ by **community type**  
81 (e.g., higher population density co-occurs with higher deprivation and food availability  
82 and lower automobile dependence and greenness). Simultaneously evaluation and  
83 control of these domains across community types can be problematic due to limited and  
84 non-overlapping distributions that make independent attribution of disease risk to  
85 specific domains difficult [13]. An alternative is to use carefully defined community types  
86 to first identify the **location** and **geographic scale** of type 2 diabetes risk [14-17].  
87 These community types should reduce within community variation and maximize  
88 between community differences. Subsequent analyses can then stratify by community  
89 type and evaluate well-characterized **community features** in relation to type 2 diabetes  
90 risk.

1  
2  
3 91 Residential development patterns reflect a continuum from rural to urban with  
4  
5 92 variation by many community features [18]. The U.S. Census Bureau defines *urbanized*  
6  
7 93 *areas* as dense settlements with 50,000 or more residents, *urban clusters* as areas with  
8  
9 94 2500–50,000 residents, and all others as *rural* [19]. In Pennsylvania, communities are  
10  
11 95 defined administratively as townships, boroughs, and cities using census minor civil  
12  
13 96 division boundaries [20]. In combination, these two definitions provide an opportunity to  
14  
15 97 evaluate experientially and behaviorally relevant geographies as well as to further  
16  
17 98 subdivide the broad category of “rural,” which includes a range of communities that vary  
18  
19 99 in their associations with health outcomes [21, 22].  
20  
21  
22  
23

24 100 We evaluated four definitions of community across a range of community types from  
25  
26 101 rural to urban in a 37-county region of Pennsylvania, in relation to type 2 diabetes onset  
27  
28 102 to inform more robust study of the community-level features that may underlie type 2  
29  
30 103 diabetes risk. Next, because higher community socioeconomic deprivation and lower  
31  
32 104 greenness have been consistently associated with higher risk of type 2 diabetes [23,  
33  
34 105 24], we evaluated associations with these features overall and within community types.  
35  
36  
37  
38  
39

## 40 107 **METHODS**

### 41 42 108 **Study Population and Design**

43  
44 109 This study was conducted by Geisinger-Johns Hopkins Bloomberg School of Public  
45  
46 110 Health, one of four academic research centers in the Diabetes LEAD (Location,  
47  
48 111 Environmental Attributes, and Disparities) Network (<http://diabetesleadnetwork.org/>), a  
49  
50 112 collaboration funded by the Centers for Disease Control and Prevention dedicated to  
51  
52 113 providing scientific evidence to develop targeted interventions and policies to prevent  
53  
54  
55  
56  
57  
58  
59  
60

1  
2  
3 114 type 2 diabetes and related health outcomes across the U.S. The study was approved  
4  
5 115 by the Geisinger Institutional Review Board under waivers of consent and assent to use  
6  
7  
8 116 electronic health record (EHR) data.  
9

10 117 Using previously reported methods [20], we used Geisinger EHR data from 1.6  
11  
12 118 million individuals to identify new onset type 2 diabetes from 2008–2016. Individuals  
13  
14 119 represent the general population in the region with high residential stability [25]. The  
15  
16  
17 120 study area included 37 counties in Pennsylvania (**Figure 1**). These data were used in a  
18  
19 121 nested case-control study.  
20

## 21 122 **Patient and Public Involvement**

22  
23  
24 123 Patients and public representatives were not involved in the development of the  
25  
26 124 study. Study results will be disseminated through Geisinger's Environmental Health  
27  
28 125 Institute in its website ([https://www.geisinger.edu/research/departments-and-](https://www.geisinger.edu/research/departments-and-centers/environmental-health-institute)  
29  
30 126 [centers/environmental-health-institute](https://www.geisinger.edu/research/departments-and-centers/environmental-health-institute)) and communications to Geisinger patients and  
31  
32  
33 127 the public.  
34

## 35 128 **Identification of New Onset Type 2 Diabetes Cases and Controls**

36  
37  
38 129 Persons with type 2 diabetes (n = 15,888) were identified using diabetes encounter  
39  
40 130 diagnoses, medication orders, and laboratory test results (**Online Supplement Table**  
41  
42 131 **S1**). EHR algorithms can identify diabetes with high sensitivity, specificity, and positive  
43  
44 132 predictive value [26, 27]. Controls (n = 79,435, with 65,084 unique persons), persons  
45  
46  
47 133 who never met any of the diabetes criteria used for cases, were randomly selected with  
48  
49 134 replacement and frequency-matched to cases (5:1) on age, sex, and year of encounter.  
50  
51 135 To ensure that we could identify diabetes if present, we required at least two encounters  
52  
53  
54 136 on different days with a primary care provider prior. To ensure diabetes was new onset,  
55  
56  
57  
58  
59  
60



1  
2  
3 137 persons had to have at least one encounter with the health system at least two years  
4  
5 138 prior without evidence of diabetes.  
6

### 7 139 **Community Types and Community Features**

8  
9  
10 140 Addresses at last contact with the health system were geocoded using ArcGIS  
11  
12 141 version 10.4 (ESRI Inc., Redlands, CA). We used four definitions of community, defined  
13  
14 142 as *administrative community type*, *urban/rural status*, *combined community type*, and  
15  
16 143 *county*, to evaluate different spatial scales and a range of characterizations of the size  
17  
18 144 and urbanicity of these areas (**Figure 2**). First, using minor civil divisions and census  
19  
20 145 tract boundaries, we categorized study communities into townships, boroughs, and city  
21  
22 146 census tracts, as previously reported [28], referred to as *administrative community type*.  
23  
24 147 Townships range from agriculturally-focused rural areas to low density suburbs;  
25  
26 148 boroughs are walkable small towns of 5,000 to 10,000 persons with a core area of  
27  
28 149 gridded streets; and cities are medium-sized urban areas (largest is Scranton–Wilkes-  
29  
30 150 Barre–Hazleton Metropolitan Statistical Area, 97<sup>th</sup> in U.S. by population). Second, we  
31  
32 151 used U.S. Census Bureau’s urbanized areas and urban clusters to define residential  
33  
34 152 addresses as “major urban,” “smaller urban,” and “rural” [19], referred to as *urban/rural*  
35  
36 153 *status*. Third, to evaluate community at a more granular level, we combined the first and  
37  
38 154 second categorizations, referred to as *combined community type*. This resulted in eight  
39  
40 155 groups (city census tract/rural had few residences so were combined with borough/rural;  
41  
42 156 township/rural was the reference group). Fourth, because most prior research of  
43  
44 157 geographic disparities in diabetes evaluated counties, which are much larger  
45  
46 158 geographies, we evaluated counties alone and after stratification by administrative  
47  
48 159 community type.  
49  
50  
51  
52  
53  
54  
55  
56  
57  
58  
59  
60

1  
2  
3 160 We evaluated two time-varying community features. Peak (16-day composite in  
4  
5 161 early July of each year) normalized difference vegetation index (NDVI, referred to as  
6  
7 162 greenness) was evaluated in 1250m squares around residences in the prior year [29].  
8  
9  
10 163 We measured community socioeconomic deprivation using a previously described scale  
11  
12 164 [30], the sum of z-transformed values of six indicators identified from a factor analysis  
13  
14 165 (proportion unemployed, less than a high school education, below poverty level, on  
15  
16 166 public assistance, not in the workforce, and without a car), using data from the  
17  
18 167 Decennial Census (2000 only) and American Community Survey (2006-2010, 2011-  
19  
20 168 2015). The scale was assigned as the closest measure prior to the year of  
21  
22 169 onset/encounter.  
23  
24  
25

## 26 170 **Statistical Analysis**

27  
28 171 The goals of the analysis were: 1) evaluate four definitions of community in relation  
29  
30 172 to odds of type 2 diabetes onset; 2) evaluate two community features, community  
31  
32 173 socioeconomic deprivation and greenness, in relation to type 2 diabetes onset in all  
33  
34 174 communities; and 3) evaluate associations of the two community features after  
35  
36 175 stratification by community type. Analysis controlled for key individual-level confounding  
37  
38 176 variables and accounted for spatial clustering of persons within communities. Statistical  
39  
40 177 analysis was completed using Stata-MP version 15.1 (StataCorp LLC, College Station,  
41  
42 178 TX).  
43  
44  
45  
46

47 179 Logistic regression was used to estimate associations (odds ratios, 95% confidence  
48  
49 180 intervals) using generalized estimating equations with robust standard errors and an  
50  
51 181 exchangeable correlation structure within administrative community types. We adjusted  
52  
53 182 for age (years; linear, quadratic, and cubic terms to allow for non-linearity), sex, race  
54  
55  
56  
57  
58  
59  
60

1  
2  
3 183 (white vs. all other races), ethnicity (Hispanic vs. non-Hispanic), and percent of time  
4  
5 184 using Medical Assistance (surrogate for family socioeconomic status [ $\geq 50\%$  vs.  $< 50\%$ ])  
6  
7  
8 185 [31]. We did not include body mass index (BMI, kg/m<sup>2</sup>) in models because this is likely a  
9  
10 186 mediator of community associations (inclusion would attenuate or eliminate associations  
11  
12 187 of interest). Models were first evaluated using all persons in all communities. We  
13  
14 188 analyzed associations of the four definitions of community, community socioeconomic  
15  
16 189 deprivation (quartiles; 4<sup>th</sup> quartile [worst deprivation] reference group), and greenness  
17  
18 190 (tertiles) with diabetes status. Due to concerns about non-overlapping distributions  
19  
20 191 resulting in extrapolation rather than adjustment (i.e., non-positivity [32]), we then  
21  
22 192 stratified the community features models by community type.  
23  
24  
25

26 193 In sensitivity analyses, to evaluate whether access to care – and thus higher  
27  
28 194 likelihood of diabetes diagnosis – may have accounted for associations between  
29  
30 195 community and diabetes, we examined the number of prior outpatient encounters (linear  
31  
32 196 and quadratic terms) for study individuals by administrative community type and Medical  
33  
34 197 Assistance status and added this variable to regression models.  
35  
36  
37  
38  
39

## 40 199 **RESULTS**

### 42 200 **Description of Study Population and Communities**

44 201 Individuals were predominantly white and non-Hispanic; the majority had a primary  
45  
46 202 care provider; and most cases were diagnosed with diabetes in an outpatient setting  
47  
48 203 (**Table 1**). Individuals resided in 291 boroughs, 146 city census tracts, and 633  
49  
50 204 townships (**Online Supplement Table S2**). Over 40% of persons resided in rural areas  
51  
52 205 (**Table 1**). Most borough residents were divided between urbanized areas and urban  
53  
54  
55  
56  
57  
58  
59  
60

1  
2  
3 206 clusters. Approximately two-thirds of persons in townships resided in rural areas. A  
4  
5 207 similar proportion of individuals in city census tracts resided in urbanized areas. On  
6  
7  
8 208 average, townships had higher greenness and lower community socioeconomic  
9  
10 209 deprivation compared to boroughs and city census tracts (**Online Supplement Table**  
11  
12 210 **S2**). Average racial and ethnic diversity and use of Medical Assistance for health  
13  
14 211 insurance were highest in city census tracts. The mean total number of encounters with  
15  
16 212 the health system before diabetes onset or the control selection date was high for all  
17  
18 213 individuals, in all community types, regardless of Medical Assistance status (**Online**  
19  
20 214 **Supplement Table S3**). Laboratory data confirmed that the categorization of diabetes  
21  
22 215 cases and controls was valid (**Online Supplement Table S4**).

### 26 216 **Associations of Communities with Type 2 Diabetes Onset**

28 217 In the base model, controlling for age and sex, non-white race (vs. white), Hispanic  
29  
30 218 ethnicity (vs. non-Hispanic), and Medical Assistance status were each associated with  
31  
32 219 increased odds of type 2 diabetes onset. These associations did not substantively  
33  
34 220 change as the community type and community features were added to the model. Odds  
35  
36 221 ratios for non-white race (vs. white) ranged from 1.36 to 1.41, for Hispanic ethnicity (vs.  
37  
38 222 non-Hispanic) from 1.46 to 1.52, and for Medical Assistance ( $\geq 50\%$  of time vs.  $< 50\%$ )  
39  
40 223 from 1.71 to 1.74, with all confidence intervals excluding 1.0. Next, when administrative  
41  
42 224 community type was added (townships as reference group), residing in boroughs and  
43  
44 225 city census tracts was associated with significantly higher odds (**Table 2, Model 1**).  
45  
46 226 Second, urban/rural status was added to the base model and residing in urbanized  
47  
48 227 areas (vs. rural areas) had increased odds of diabetes onset (**Table 2, Model 2**). Third,  
49  
50 228 the combined definition was added to the base model, and some categories (e.g., city  
51  
52  
53  
54  
55  
56  
57  
58  
59  
60

1  
2  
3 229 census tracts in major urban and smaller urban areas highest, boroughs in these areas  
4  
5 230 intermediate, vs. townships in rural areas as reference) were associated with increased  
6  
7 231 odds of new onset diabetes (**Table 2, Model 3**). Finally, county was added to the base  
8  
9 232 model, and seven counties were associated with reduced odds and two with increased  
10  
11 233 odds of diabetes (**Table 2, Model 4**). We next evaluated community socioeconomic  
12  
13 234 deprivation and greenness. When these community features were added to the base  
14  
15 235 model, lower deprivation (**Table 2, Model 5**) and higher greenness (**Table 2, Model 6**)  
16  
17 236 were associated with reduced odds of diabetes.

18  
19  
20  
21 237 Models were next stratified by community type (only results for administrative  
22  
23 238 community type shown). Race/ethnicity and Medical Assistance status were still  
24  
25 239 associated with type 2 diabetes onset in the stratified models in all administrative  
26  
27 240 community types (**Online Supplement Table S5**). Associations of community  
28  
29 241 socioeconomic deprivation with diabetes evidenced decreasing odds ratios across  
30  
31 242 decreasing deprivation quartiles in all community types, but only crossed an inferential  
32  
33 243 threshold in city census tracts, with approximately 25% lower odds in the 1<sup>st</sup> vs. 4<sup>th</sup>  
34  
35 244 quartile. Higher greenness was associated with reduced odds of diabetes in all  
36  
37 245 community types.

38  
39  
40  
41  
42 246 Even after stratification by administrative community type and adjustment for  
43  
44 247 community socioeconomic deprivation, several counties were independently associated  
45  
46 248 with increased or reduced odds of diabetes onset (**Online Supplement Table S6**). The  
47  
48 249 number of significant associations (n = 18, nine each with reduced or increased odds)  
49  
50 250 was somewhat larger than that expected due to chance (108 statistical tests  
51  
52 251 performed), with most associations observed for residing in boroughs. In these models,  
53  
54  
55  
56  
57  
58  
59  
60

1  
2  
3 252 associations with community socioeconomic deprivation were present in the 1<sup>st</sup> quartile  
4  
5 253 (vs. 4<sup>th</sup>) in townships and boroughs and in all quartiles in city census tracts. In all  
6  
7  
8 254 community types, higher greenness was associated with lower odds of diabetes.  
9

## 10 255 **Sensitivity Analyses**

11  
12 256 Addition of total outpatient encounters before diagnosis/control selection date did not  
13  
14 257 substantively change associations in non-stratified or stratified models (results not  
15  
16  
17 258 shown). Community socioeconomic deprivation and greenness were evaluated together  
18  
19 259 in models in boroughs and townships. In boroughs, associations of greenness with type  
20  
21 260 2 diabetes onset were attenuated by 1-2% and associations with community  
22  
23  
24 261 socioeconomic deprivation were no longer present. In townships, there was no  
25  
26 262 substantive change in associations or inferences for greenness and associations with  
27  
28 263 community socioeconomic deprivation were no longer present. These variables could  
29  
30 264 not be evaluated together in city census tracts due to insufficient overlap in distributions.  
31  
32

33 265

## 35 266 **DISCUSSION**

36  
37  
38 267 There is great interest in understanding geographic disparities in type 2 diabetes  
39  
40 268 risk. If the primary causes of these differences were community-level factors,  
41  
42 269 community-level interventions could have large impacts on diabetes risk. A strong  
43  
44 270 theoretical basis, and growing empirical evidence, indicates that community features  
45  
46  
47 271 contribute to diabetes risk directly or through increased risk of obesity, such as social,  
48  
49 272 built, and natural environments contributing to impacts on physical activity and stress  
50  
51 273 [33-35]. The primary goal of this study was to evaluate geographic disparities in type 2  
52  
53  
54 274 diabetes by evaluating four definitions of community across the full range from rural to  
55  
56  
57  
58  
59  
60

1  
2  
3 275 urban. We then evaluated associations of community socioeconomic deprivation and  
4  
5 276 greenness overall and in models stratified by community type, the latter greatly reducing  
6  
7 277 the degree to which these associations could be confounded by other community  
8  
9  
10 278 features.

11  
12 279 In the study region, the use of combined community type allowed us to carefully  
13  
14 280 identify the location and scale of risk. Risk of new onset type 2 diabetes was highest in  
15  
16 281 cities in smaller urban areas, followed by cities in major urban areas and boroughs in  
17  
18 282 major and smaller urban areas. In addition, even after accounting for community type  
19  
20 283 and features, county was independently associated with diabetes onset. While many  
21  
22 284 prior studies have evaluated county differences in diabetes risk [4, 36-38], none have  
23  
24 285 also simultaneously evaluated communities. Our associations suggest that the risk  
25  
26 286 factors that undergird U.S. geographic differences in diabetes likely exist at multiple,  
27  
28 287 nested spatial scales. Some of the county associations were of high magnitude (e.g.,  
29  
30 288 exceeded 1.5 for protection or risk). Finally, there were consistent associations of higher  
31  
32 289 community socioeconomic deprivation and lower greenness with higher diabetes risk,  
33  
34 290 the former primarily in city census tracts, where average deprivation levels were higher,  
35  
36 291 and the latter in all communities. We do not believe that the apparent lower diabetes  
37  
38 292 risk in rural areas was due to less likely diagnosis due to lower access to health care,  
39  
40 293 since, on average, individuals in the study, regardless of Medical Assistance status and  
41  
42 294 community type, had high contact with the health care system.

43  
44 295 We found several strong and consistent associations of individual-level  
45  
46 296 characteristics. Non-white race, Hispanic ethnicity, and Medical Assistance status (a  
47  
48 297 surrogate for low family socioeconomic status) were consistently associated with 1.3 to  
49  
50  
51  
52  
53  
54  
55  
56  
57  
58  
59  
60



1  
2  
3 298 1.7-fold increased odds of type 2 diabetes onset. Overall, the findings suggest that  
4  
5 299 sociodemographic factors (race/ethnicity and individual-level socioeconomic status),  
6  
7 300 urbanicity, higher community socioeconomic deprivation, and lower greenness, all of  
8  
9 301 which co-occur in our region, were strong risk factors for type 2 diabetes.

12 302 Our findings on elevated risk of type 2 diabetes onset in urban areas is inconsistent  
13  
14 303 with national studies that have reported higher crude prevalence estimates of type 2  
15  
16 304 diabetes in rural areas [39]. However, a study of the Behavioral Risk Factor  
17  
18 305 Surveillance System found that after adjusting for individual-level socioeconomic  
19  
20 306 measures, prevalence was higher in urban areas [40]. Geospatial predictors of diabetes  
21  
22 307 risk likely vary by community and region; prior studies have reported, for example, that  
23  
24 308 nine county-level measures of socioeconomic, race/ethnicity, and built environmental  
25  
26 309 features explained up to 94% of the variation in type 2 diabetes prevalence in the  
27  
28 310 Midwest, but very little variation in Pennsylvania [36].

33 311 The associations of greenness with diabetes were consistent with prior studies, but  
34  
35 312 our results are the first to demonstrate robust findings across all types of communities  
36  
37 313 while additionally controlling for county. The measurement of community features  
38  
39 314 across community types may result in measures with different interpretations in different  
40  
41 315 communities and regions; for example, agricultural, coniferous forest, and deciduous  
42  
43 316 forest greenness are not evenly distributed and have different impacts on health [22].

47 317 Most prior studies of geographic disparities in diabetes have been cross-sectional, at  
48  
49 318 the ecologic level, relying on self-reported diabetes, and focused on prevalent diabetes  
50  
51 319 by county (too large and heterogeneous) or census tract (not experientially and  
52  
53 320 behaviorally relevant). The current study avoided all these limitations. In addition, while  
54  
55  
56  
57



1  
2  
3 321 many public health services are delivered at the county level, many potential  
4  
5 322 interventions to address diabetes would need to be implemented at smaller scales and  
6  
7 323 would not have county-wide impacts.

8  
9  
10 324 The study had some limitations. Although we adjusted for Medical Assistance health  
11  
12 325 insurance as a surrogate for family socioeconomic status, there could still be residual  
13  
14 326 confounding by individual-level income [31]. We did not measure behavioral mediators  
15  
16 327 of the community definitions and features, such as physical activity or dietary intake. We  
17  
18 328 could not account for residential selection bias, in which associations are due to reverse  
19  
20 329 causation (if persons with individual-level risk factors for diabetes are more likely to  
21  
22 330 reside in certain areas, by choice or opportunity). This can be a concern in studies of  
23  
24 331 this type; social processes determine residence, so it can be difficult to distinguish  
25  
26 332 individual-level characteristics from features of communities [41]. The residential  
27  
28 333 stability and general population representativeness of our study population may mitigate  
29  
30 334 these concerns. Although we used four definitions of community, all used administrative  
31  
32 335 boundaries and thus may not represent how residents view the communities in which  
33  
34 336 they reside and could still present edge and boundary effects and the modifiable areal  
35  
36 337 unit problem [42-44].

37  
38 338 The study had several strengths. Diabetes was objectively documented and verified  
39  
40 339 with extensive biomarker and medical data. Temporality was appropriate for all  
41  
42 340 independent variables. Study participants resided in a range of communities from urban  
43  
44 341 to rural. We studied several approaches to community characterization at more relevant  
45  
46 342 contextual scales than many prior studies and showed that smaller community contexts  
47  
48  
49  
50  
51  
52  
53  
54  
55  
56  
57  
58  
59  
60

1  
2  
3 343 were associated with diabetes onset. Stratifying by community types limited bias from  
4  
5 344 non-positivity [32].  
6

7  
8 345 The study findings provide important clues for the location (i.e., urban) and  
9  
10 346 geographic scale (i.e., as localized as a square mile, the average area of boroughs and  
11  
12 347 city census tracts) that identifies geospatial disparities in type 2 diabetes in  
13  
14 348 Pennsylvania. We speculate that, since risk was higher in urban areas, our findings may  
15  
16 349 suggest a smaller role for the positive features of the food and physical activity  
17  
18 350 environments present in these areas (e.g., greater access to grocery stores, more  
19  
20 351 walkable neighborhoods, more commercial physical activity opportunity establishments)  
21  
22 352 and a larger role for individual and community demographic and socioeconomic factors  
23  
24 353 found in the same areas.  
25  
26  
27  
28  
29 354

### 355 **Author contributions**

356 Manuscript authors contributed in the following ways: conception of work: BSS,  
357 MNP, KRS, CIM, GI, AGH; obtained funding: BSS, AGH; study design: BSS, JSP, KBR,  
358 AGH; data management and analysis: JSP, KBR, BSS, MNP, JD, KAM, AGH; results  
359 interpretation: BSS, MNP, KBR, JD, KAM, KRS, CIM, GI, AGH; initial manuscript  
360 writing: BSS, MNP, KAM, AGH; critical revision of manuscript, final approval, and  
361 accountable for their work: BSS, JSP, MNP, KBR, KAM, JD, KRS, CIM, GI, AGH.

### 363 **Competing interests**

364 All authors declared that they have no competing interests.

### 366 **Funding**

367 This publication was made possible by Cooperative Agreement Number DP006293  
368 funded by the U.S. Centers for Disease Control and Prevention, Division of Diabetes  
369 Translation.

### 371 **Data sharing**

372 De-identified electronic health record data are available upon written request with  
373 IRB approval and a data use agreement. All community data are publicly available.

## References

1. Centers for Disease Control and Prevention, *National Diabetes Statistics Report 2020: Estimates of Diabetes and Its Burden in the United States.*, U.S. Department of Health and Human Services, Editor. 2020, Centers for Disease Control and Prevention: Atlanta, GA.
2. Garcia, M.C., et al., *Reducing Potentially Excess Deaths from the Five Leading Causes of Death in the Rural United States.* MMWR Surveill Summ, 2017. **66**(2): p. 1-7.
3. Ford, E.S., et al., *Geographic variation in the prevalence of obesity, diabetes, and obesity-related behaviors.* Obes Res, 2005. **13**(1): p. 118-22.
4. Cunningham, S.A., et al., *County-level contextual factors associated with diabetes incidence in the United States.* Ann Epidemiol, 2018. **28**(1): p. 20-25 e2.
5. Rural Health Information Hub. *Why Diabetes is a Concern for Rural Communities 2020* April 13, 2020]; Available from: <https://www.ruralhealthinfo.org/toolkits/diabetes/1/rural-concerns>.
6. Singh, G.K. and M. Siahpush, *Widening rural-urban disparities in all-cause mortality and mortality from major causes of death in the USA, 1969-2009.* J Urban Health, 2014. **91**(2): p. 272-92.
7. James, C.V., et al., *Racial/Ethnic Health Disparities Among Rural Adults - United States, 2012-2015.* MMWR Surveill Summ, 2017. **66**(23): p. 1-9.
8. Cosby, A.G., et al., *Growth and Persistence of Place-Based Mortality in the United States: The Rural Mortality Penalty.* Am J Public Health, 2019. **109**(1): p. 155-162.
9. Henning-Smith, C.E., et al., *Rural Counties With Majority Black Or Indigenous Populations Suffer The Highest Rates Of Premature Death In The US.* Health Aff (Millwood), 2019. **38**(12): p. 2019-2026.
10. Maier, W., et al., *Area level deprivation is an independent determinant of prevalent type 2 diabetes and obesity at the national level in Germany. Results from the National Telephone Health Interview Surveys 'German Health Update' GEDA 2009 and 2010.* PLoS One, 2014. **9**(2): p. e89661.
11. Muller, G., et al., *Regional and neighborhood disparities in the odds of type 2 diabetes: results from 5 population-based studies in Germany (DIAB-CORE consortium).* Am J Epidemiol, 2013. **178**(2): p. 221-30.
12. Jagai, J.S., et al., *Association between environmental quality and diabetes in the USA.* J Diabetes Investig, 2019.
13. Honold, J., et al., *Multiple environmental burdens and neighborhood-related health of city residents.* Journal of Environmental Psychology, 2012. **32**(4): p. 305-317.
14. Mavoa, S., et al., *How Do Neighbourhood Definitions Influence the Associations between Built Environment and Physical Activity?* Int J Environ Res Public Health, 2019. **16**(9).
15. Dekker, L.H., R.H. Rijnks, and G.J. Navis, *Regional variation in type 2 diabetes: evidence from 137 820 adults on the role of neighbourhood body mass index.* Eur J Public Health, 2020. **30**(1): p. 189-194.
16. Stafford, M., O. Duke-Williams, and N. Shelton, *Small area inequalities in health: are we underestimating them?* Soc Sci Med, 2008. **67**(6): p. 891-9.
17. Tuson, M., et al., *Incorporating geography into a new generalized theoretical and statistical framework addressing the modifiable areal unit problem.* Int J Health Geogr, 2019. **18**(1): p. 6.
18. Bennett, K.J., et al., *What Is Rural? Challenges And Implications Of Definitions That Inadequately Encompass Rural People And Places.* Health Aff (Millwood), 2019. **38**(12): p. 1985-1992.
19. Census Bureau. *Geography program: 2010 census urban and rural classification and urban area criteria.* . 2018 [cited 2020 January 5, 2020]; Available from:

- <https://www.census.gov/programssurveys/geography/guidance/geoareas/urban-rural/2010-urbanrural.html>.
20. Hirsch, A.G., et al., *Associations of Four Community Factors With Longitudinal Change in Hemoglobin A1c Levels in Patients With Type 2 Diabetes*. *Diabetes Care*, 2018. **41**(3): p. 461-468.
  21. Cohen, S.A., et al., *A Closer Look at Rural-Urban Health Disparities: Associations Between Obesity and Rurality Vary by Geospatial and Sociodemographic Factors*. *J Rural Health*, 2017. **33**(2): p. 167-179.
  22. James, W.L., *All rural places are not created equal: revisiting the rural mortality penalty in the United States*. *Am J Public Health*, 2014. **104**(11): p. 2122-9.
  23. Astell-Burt, T., X. Feng, and G.S. Kolt, *Is neighborhood green space associated with a lower risk of type 2 diabetes? Evidence from 267,072 Australians*. *Diabetes Care*, 2014. **37**(1): p. 197-201.
  24. Muller, G., et al., *Inner-city green space and its association with body mass index and prevalent type 2 diabetes: a cross-sectional study in an urban German city*. *BMJ Open*, 2018. **8**(1): p. e019062.
  25. Casey, J.A., et al., *Unconventional Natural Gas Development and Birth Outcomes in Pennsylvania, USA*. *Epidemiology*, 2016. **27**(2): p. 163-72.
  26. Lawrence, J.M., et al., *Validation of pediatric diabetes case identification approaches for diagnosed cases by using information in the electronic health records of a large integrated managed health care organization*. *Am J Epidemiol*, 2014. **179**(1): p. 27-38.
  27. Zhong, V.W., et al., *Use of administrative and electronic health record data for development of automated algorithms for childhood diabetes case ascertainment and type classification: the SEARCH for Diabetes in Youth Study*. *Pediatr Diabetes*, 2014. **15**(8): p. 573-84.
  28. Schwartz, B.S., et al., *Body mass index and the built and social environments in children and adolescents using electronic health records*. *Am J Prev Med*, 2011. **41**(4): p. e17-28.
  29. Casey, J.A., et al., *Greenness and Birth Outcomes in a Range of Pennsylvania Communities*. *Int J Environ Res Public Health*, 2016. **13**(3).
  30. Nau, C., et al., *Community socioeconomic deprivation and obesity trajectories in children using electronic health records*. *Obesity (Silver Spring)*, 2015. **23**(1): p. 207-12.
  31. Casey, J.A., et al., *Measures of SES for Electronic Health Record-based Research*. *Am J Prev Med*, 2018. **54**(3): p. 430-439.
  32. Petersen, M.L., et al., *Diagnosing and responding to violations in the positivity assumption*. *Stat Methods Med Res*, 2012. **21**(1): p. 31-54.
  33. Cox, M., et al., *Locality deprivation and Type 2 diabetes incidence: a local test of relative inequalities*. *Soc Sci Med*, 2007. **65**(9): p. 1953-64.
  34. Maier, W., et al., *The impact of regional deprivation and individual socio-economic status on the prevalence of Type 2 diabetes in Germany. A pooled analysis of five population-based studies*. *Diabet Med*, 2013. **30**(3): p. e78-86.
  35. James, P., et al., *A Review of the Health Benefits of Greenness*. *Curr Epidemiol Rep*, 2015. **2**(2): p. 131-142.
  36. Hipp, J.A. and N. Chalise, *Spatial analysis and correlates of county-level diabetes prevalence, 2009-2010*. *Prev Chronic Dis*, 2015. **12**: p. E08.
  37. Geiss, L.S., et al., *Changes in diagnosed diabetes, obesity, and physical inactivity prevalence in US counties, 2004-2012*. *PLoS One*, 2017. **12**(3): p. e0173428.
  38. Liese, A.D., et al., *Evaluating geographic variation in type 1 and type 2 diabetes mellitus incidence in youth in four US regions*. *Health Place*, 2010. **16**(3): p. 547-56.
  39. National Center for Chronic Disease Prevention and Health Promotion. *Division of Diabetes Translation At A Glance*. 2019 January 20, 2020]; Available from: <https://www.cdc.gov/chronicdisease/resources/publications/aag/diabetes.htm>.

- 1  
2  
3 40. O'Connor, A. and G. Wellenius, *Rural-urban disparities in the prevalence of diabetes and*  
4 *coronary heart disease*. *Public Health*, 2012. **126**(10): p. 813-20.  
5 41. Macintyre, S. and A. Ellaway, *Ecological approaches: rediscovering the role of the physical and*  
6 *social environment.*, in *Social Epidemiology.*, I. Kawachi and L. Berkman, Editors. 2000, Oxford  
7 University Press: New York. p. 332-348.  
8 42. Openshaw, S., *The Modifiable Areal Unit Problem*. 1984, Norwich, CT.: GeoBooks.  
9 43. Wong, D., *The modifiable areal unit problem (MAUP).* , in *The SAGE Handbook of Spatial*  
10 *Analysis.* , A.S. Fotheringham and P.A. Rogerson, Editors. 2009, SAGE Publications: London. p.  
11 105-124.  
12 44. Sadler, R.C., J.A. Gilliland, and G. Arku, *An application of the edge effect in measuring*  
13 *accessibility to multiple food retailer types in southwestern Ontario, Canada*. *Int J Health Geogr*,  
14 2011. **10**: p. 34.  
15  
16  
17  
18  
19  
20  
21  
22  
23  
24  
25  
26  
27  
28  
29  
30  
31  
32  
33  
34  
35  
36  
37  
38  
39  
40  
41  
42  
43  
44  
45  
46  
47  
48  
49  
50  
51  
52  
53  
54  
55  
56  
57  
58  
59  
60

**Table 1.** Selected characteristics of individuals with diabetes and controls, frequency-matched to cases (5:1) on age, sex, and year of diagnosis or control selection date.

| Variable                                                                                               | Cases         | Controls      | p-value* |
|--------------------------------------------------------------------------------------------------------|---------------|---------------|----------|
| Unique persons                                                                                         | 15,888        | 65,084        | NA       |
| Number                                                                                                 | 15,888        | 79,435        | NA       |
| Sex, female, n (COL %)                                                                                 | 7798 (49.1)   | 38,988 (49.1) | matched  |
| Age at diagnosis or control selection date, years, mean (SD)                                           | 54.9 (15.1)   | 54.9 (15.3)   | matched  |
| Age, years, categories, n (COL %)                                                                      |               |               | matched  |
| 10 to < 20 years                                                                                       | 304 (1.9)     | 1520 (1.9)    |          |
| 20 to < 30 years                                                                                       | 628 (4.0)     | 3140 (4.0)    |          |
| 30 to < 40 years                                                                                       | 1611 (10.1)   | 8055 (10.1)   |          |
| 40 to < 50 years                                                                                       | 3086 (19.4)   | 15,429 (19.4) |          |
| 50 to < 60 years                                                                                       | 4286 (27.0)   | 21,428 (27.0) |          |
| 60 to < 70 years                                                                                       | 3510 (22.1)   | 17,548 (22.1) |          |
| 70 to < 80 years                                                                                       | 1737 (10.9)   | 8685 (10.9)   |          |
| 80 to < 90 years                                                                                       | 645 (4.1)     | 3225 (4.1)    |          |
| ≥ 90 years                                                                                             | 81 (0.5)      | 405 (0.5)     |          |
| Race, white, n (COL %)                                                                                 | 15,429 (97.1) | 77,867 (98.0) | < 0.001  |
| Hispanic ethnicity, n (COL %)                                                                          | 369 (2.3)     | 1094 (1.4)    | < 0.001  |
| Primary care provider†, yes, n (%)                                                                     | 11,884 (74.8) | 61,042 (76.9) | < 0.001  |
| Year of diagnosis/encounter, n (COL %)                                                                 |               |               | matched  |
| 2008                                                                                                   | 1761 (11.1)   | 8805 (11.1)   |          |
| 2009                                                                                                   | 2019 (12.7)   | 10,095 (12.7) |          |
| 2010                                                                                                   | 1747 (11.0)   | 8735 (11.0)   |          |
| 2011                                                                                                   | 1675 (10.5)   | 8373 (10.5)   |          |
| 2012                                                                                                   | 1716 (10.8)   | 8579 (10.8)   |          |
| 2013                                                                                                   | 1842 (11.6)   | 9209 (11.6)   |          |
| 2014                                                                                                   | 1844 (11.6)   | 9220 (11.6)   |          |
| 2015                                                                                                   | 1734 (10.9)   | 8669 (10.9)   |          |
| 2016                                                                                                   | 1550 (9.8)    | 7750 (9.8)    |          |
| Setting of diagnosis/encounter, n (COL %)                                                              |               |               | < 0.001  |
| Outpatient                                                                                             | 12,068 (76.0) | 73,998 (93.2) |          |
| Medication order                                                                                       | 1632 (10.3)   | 0 (0.0)       |          |
| Urgent care                                                                                            | 165 (1.0)     | 2116 (2.7)    |          |
| Emergency department                                                                                   | 1526 (9.6)    | 3068 (3.9)    |          |
| Inpatient                                                                                              | 498 (3.1)     | 252 (0.3)     |          |
| Outpatient encounters in year before diagnosis or control selection date, mean (SD)                    | 4.4 (5.1)     | 3.5 (4.1)     | < 0.001  |
| Outpatient encounters, total before diagnosis or control selection date, mean (SD)                     | 35.9 (34.8)   | 35.2 (32.5)   | 0.01     |
| Medical Assistance, % of time receiving, n (COL %)                                                     |               |               | < 0.001  |
| < 50%                                                                                                  | 14,921 (93.9) | 76,705 (83.7) |          |
| ≥ 50%                                                                                                  | 967 (6.1)     | 2730 (3.4)    |          |
| Outpatient encounters before diagnosis/encounter, mean (SD), by % of time receiving Medical Assistance |               |               | < 0.001  |



| Variable                                                                                                                                                                                                                                                                                                                                                                                                                                                                                                                                                                                                                                                                                                                                                                                                                                                                                                                                                                                                                                                                                                           | Cases       | Controls      | p-value* |
|--------------------------------------------------------------------------------------------------------------------------------------------------------------------------------------------------------------------------------------------------------------------------------------------------------------------------------------------------------------------------------------------------------------------------------------------------------------------------------------------------------------------------------------------------------------------------------------------------------------------------------------------------------------------------------------------------------------------------------------------------------------------------------------------------------------------------------------------------------------------------------------------------------------------------------------------------------------------------------------------------------------------------------------------------------------------------------------------------------------------|-------------|---------------|----------|
| 0%                                                                                                                                                                                                                                                                                                                                                                                                                                                                                                                                                                                                                                                                                                                                                                                                                                                                                                                                                                                                                                                                                                                 | 35.5 (34.1) | 34.9 (32.1)   |          |
| 0.1-24.9%                                                                                                                                                                                                                                                                                                                                                                                                                                                                                                                                                                                                                                                                                                                                                                                                                                                                                                                                                                                                                                                                                                          | 45.2 (40.7) | 42.8 (38.3)   |          |
| 25.0-74.9%                                                                                                                                                                                                                                                                                                                                                                                                                                                                                                                                                                                                                                                                                                                                                                                                                                                                                                                                                                                                                                                                                                         | 33.9 (35.8) | 35.2 (33.6)   |          |
| 75+%                                                                                                                                                                                                                                                                                                                                                                                                                                                                                                                                                                                                                                                                                                                                                                                                                                                                                                                                                                                                                                                                                                               | 29.1 (26.9) | 27.7 (26.0)   |          |
| Duration from first contact with health system to diagnosis/control selection date, years, n (%)                                                                                                                                                                                                                                                                                                                                                                                                                                                                                                                                                                                                                                                                                                                                                                                                                                                                                                                                                                                                                   |             |               | 0.72     |
| Quartile 1 (2 to < 5 years)                                                                                                                                                                                                                                                                                                                                                                                                                                                                                                                                                                                                                                                                                                                                                                                                                                                                                                                                                                                                                                                                                        | 1860 (11.7) | 9466 (11.9)   |          |
| Quartile 2 (5 to < 8 years)                                                                                                                                                                                                                                                                                                                                                                                                                                                                                                                                                                                                                                                                                                                                                                                                                                                                                                                                                                                                                                                                                        | 2571 (16.2) | 12,646 (15.9) |          |
| Quartile 3 (8 to < 12 years)                                                                                                                                                                                                                                                                                                                                                                                                                                                                                                                                                                                                                                                                                                                                                                                                                                                                                                                                                                                                                                                                                       | 4700 (29.6) | 23,665 (29.8) |          |
| Quartile 4 ( $\geq$ 12 years)                                                                                                                                                                                                                                                                                                                                                                                                                                                                                                                                                                                                                                                                                                                                                                                                                                                                                                                                                                                                                                                                                      | 6757 (42.5) | 33,658 (42.4) |          |
| Community socioeconomic deprivation, n (COL %) <sup>‡</sup>                                                                                                                                                                                                                                                                                                                                                                                                                                                                                                                                                                                                                                                                                                                                                                                                                                                                                                                                                                                                                                                        |             |               | < 0.001  |
| Quartile 1                                                                                                                                                                                                                                                                                                                                                                                                                                                                                                                                                                                                                                                                                                                                                                                                                                                                                                                                                                                                                                                                                                         | 3001 (18.9) | 17,329 (21.8) |          |
| Quartile 2                                                                                                                                                                                                                                                                                                                                                                                                                                                                                                                                                                                                                                                                                                                                                                                                                                                                                                                                                                                                                                                                                                         | 4300 (27.1) | 23,172 (29.2) |          |
| Quartile 3                                                                                                                                                                                                                                                                                                                                                                                                                                                                                                                                                                                                                                                                                                                                                                                                                                                                                                                                                                                                                                                                                                         | 4217 (26.5) | 20,328 (25.6) |          |
| Quartile 4                                                                                                                                                                                                                                                                                                                                                                                                                                                                                                                                                                                                                                                                                                                                                                                                                                                                                                                                                                                                                                                                                                         | 4370 (27.5) | 18,606 (23.4) |          |
| Greenness, peak NDVI, in buffer, n (COL %) §                                                                                                                                                                                                                                                                                                                                                                                                                                                                                                                                                                                                                                                                                                                                                                                                                                                                                                                                                                                                                                                                       |             |               | < 0.001  |
| Tertile 1                                                                                                                                                                                                                                                                                                                                                                                                                                                                                                                                                                                                                                                                                                                                                                                                                                                                                                                                                                                                                                                                                                          | 5894 (37.1) | 25,894 (32.6) |          |
| Tertile 2                                                                                                                                                                                                                                                                                                                                                                                                                                                                                                                                                                                                                                                                                                                                                                                                                                                                                                                                                                                                                                                                                                          | 5023 (31.6) | 26,751 (33.7) |          |
| Tertile 3                                                                                                                                                                                                                                                                                                                                                                                                                                                                                                                                                                                                                                                                                                                                                                                                                                                                                                                                                                                                                                                                                                          | 4971 (31.3) | 26,790 (33.7) |          |
| Administrative community type of residence, n (COL %)                                                                                                                                                                                                                                                                                                                                                                                                                                                                                                                                                                                                                                                                                                                                                                                                                                                                                                                                                                                                                                                              |             |               | < 0.001  |
| Borough                                                                                                                                                                                                                                                                                                                                                                                                                                                                                                                                                                                                                                                                                                                                                                                                                                                                                                                                                                                                                                                                                                            | 4621 (29.1) | 21,756 (27.4) |          |
| Census tract in city                                                                                                                                                                                                                                                                                                                                                                                                                                                                                                                                                                                                                                                                                                                                                                                                                                                                                                                                                                                                                                                                                               | 1806 (11.4) | 6548 (8.2)    |          |
| Township                                                                                                                                                                                                                                                                                                                                                                                                                                                                                                                                                                                                                                                                                                                                                                                                                                                                                                                                                                                                                                                                                                           | 9461 (59.6) | 51,131 (64.4) |          |
| Setting of residence, n (COL %)                                                                                                                                                                                                                                                                                                                                                                                                                                                                                                                                                                                                                                                                                                                                                                                                                                                                                                                                                                                                                                                                                    |             |               | < 0.001  |
| Rural                                                                                                                                                                                                                                                                                                                                                                                                                                                                                                                                                                                                                                                                                                                                                                                                                                                                                                                                                                                                                                                                                                              | 6513 (41.0) | 34,984 (44.0) |          |
| Urbanized area                                                                                                                                                                                                                                                                                                                                                                                                                                                                                                                                                                                                                                                                                                                                                                                                                                                                                                                                                                                                                                                                                                     | 4906 (30.9) | 23,423 (29.5) |          |
| Urban cluster                                                                                                                                                                                                                                                                                                                                                                                                                                                                                                                                                                                                                                                                                                                                                                                                                                                                                                                                                                                                                                                                                                      | 4469 (28.1) | 21,028 (26.5) |          |
| <p><b>Abbreviations:</b> COL = column; NDVI = normalized difference vegetation index; SD = standard deviation.</p> <p>* Because controls could be in these comparisons more than once, methods were used for significance testing that accounted for this, including inverse-probability weighted regression for time-invariant characteristics, mixed-effect regression for time-varying continuous (linear), binary (logistic), and count (Poisson) characteristics, and multinomial logistic regression with robust standard errors for polytomous time-varying characteristics. In the weighted analyses, weights were the number of appearances in the analysis (implemented with a dataset having only one record per person).</p> <p>† According to Geisinger's primary care provider lists.</p> <p>‡ Quartile cutoffs were defined within the three time periods; the range of values for Q1, Q2, Q3, and Q4 were -18.33 to -1.96; -1.99 to -0.015; 0.005 to 2.05; and 2.11 to 12.4.</p> <p>§ The range of values in T1, T2, and T3 were 0.07 to 0.627, 0.63 to 0.756, and 0.76 to 0.94, respectively.</p> |             |               |          |



**Table 2.** Adjusted\* associations of community and community feature variables **from separate models** with new onset type 2 diabetes status.

| Variable                                                              | OR (95% CI)       |
|-----------------------------------------------------------------------|-------------------|
| <b>Community types</b>                                                |                   |
| <b>Model 1: Administrative community type</b>                         |                   |
| Township                                                              | 1.0               |
| Borough                                                               | 1.10 (1.04, 1.16) |
| City census tract                                                     | 1.34 (1.25, 1.44) |
| <b>Model 2: Residential location, urban/rural</b>                     |                   |
| Rural                                                                 | 1.0               |
| Urbanized area                                                        | 1.14 (1.08, 1.21) |
| Urban cluster                                                         | 1.04 (0.98, 1.11) |
| <b>Model 3: Combined location†</b>                                    |                   |
| Township / rural                                                      | 1.0               |
| Township / urban cluster                                              | 1.00 (0.92, 1.08) |
| Township / urbanized area                                             | 1.06 (0.98, 1.16) |
| Borough + city census tract / rural                                   | 1.04 (0.95, 1.15) |
| Borough / urban cluster                                               | 1.09 (1.01, 1.18) |
| Borough / urbanized area                                              | 1.15 (1.06, 1.25) |
| City census tract / urban cluster                                     | 1.41 (1.22, 1.62) |
| City census tract / urbanized area                                    | 1.33 (1.22, 1.45) |
| <b>Model 4: County ‡</b>                                              |                   |
| Luzerne                                                               | 1.0               |
| Blair                                                                 | 0.73 (0.57, 0.95) |
| Centre                                                                | 0.84 (0.75, 0.94) |
| Juniata                                                               | 1.19 (1.00, 1.40) |
| Lackawanna                                                            | 1.19 (1.07, 1.31) |
| Lebanon                                                               | 0.39 (0.16, 0.93) |
| Monroe                                                                | 0.78 (0.69, 0.88) |
| Schuylkill                                                            | 0.85 (0.78, 0.92) |
| Sullivan                                                              | 0.60 (0.45, 0.81) |
| Union                                                                 | 0.77 (0.64, 0.93) |
| <b>Community features, all communities combined</b>                   |                   |
| <b>Model 5: community socioeconomic deprivation, quartiles §</b>      |                   |
| 1                                                                     | 0.82 (0.76, 0.88) |
| 2                                                                     | 0.87 (0.81, 0.93) |
| 3                                                                     | 0.89 (0.83, 0.96) |
| 4                                                                     | 1.0               |
| <b>Model 6: greenness (normalized difference vegetation index)   </b> |                   |
| 1                                                                     | 1.0               |
| 2                                                                     | 0.88 (0.85, 0.93) |
| 3                                                                     | 0.84 (0.80, 0.88) |

1  
2  
3 \* Logistic regression models using generalized estimating equations with robust  
4 standard errors; one community or community feature variable was in the model at  
5 a time; models adjusted for sex, race (white vs. non-white), ethnicity (Hispanic vs.  
6 non-Hispanic), age (age, age<sup>2</sup>, age<sup>3</sup>), and Medical Assistance status.

7 † This is a combination of administrative community type and residential location  
8 (urban/rural); the few persons in city census tract / rural were combined with  
9 borough / rural.

10 ‡ Only counties with confidence interval excluding 1.0 are shown in table. Luzerne  
11 County was selected as the reference group because it is the most populous  
12 county in the study region.

13 § Quartile cutoffs were defined within the three time periods; the range of values for  
14 persons in Q1, Q2, Q3, and Q4 were -25.06 to -1.82; -1.99 to 0.10; 0.005 to 2.05;  
15 and 1.89 to 12.4, respectively.

16 || The range of values in T1, T2, and T3 were 0.07 to 0.627, 0.63 to 0.756, and 0.76  
17 to 0.94, respectively.  
18  
19  
20  
21  
22  
23  
24  
25  
26  
27  
28  
29  
30  
31  
32  
33  
34  
35  
36  
37  
38  
39  
40  
41  
42  
43  
44  
45  
46  
47  
48  
49  
50  
51  
52  
53  
54  
55  
56  
57  
58  
59  
60

## Figure Captions

**Figure 1.** Distribution of study individuals and administrative community types by county in study region. The bolded number is the number of individuals; T, B, and C identify the number of townships, boroughs, and city census tracts within each county that were included in the analysis.

**Figure 2.** Areas along the Susquehanna River in Lycoming County, Pennsylvania from Williamsport (city) and South Williamsport (borough) to Montoursville (borough), Muncy (borough), and Montgomery (borough), showing relations between administrative community types (townships, boroughs, and city census tracts) and urbanized areas, urban clusters, and rural areas. Both sets of these administrative boundaries were used in the analysis.

1  
2  
3  
4  
5  
6  
7  
8  
9  
10  
11  
12  
13  
14  
15  
16  
17  
18  
19  
20  
21  
22  
23  
24  
25  
26  
27  
28  
29  
30  
31  
32  
33  
34  
35  
36  
37  
38  
39  
40  
41  
42  
43  
44  
45  
46  
47  
48  
49  
50  
51  
52  
53  
54  
55  
56  
57  
58  
59  
60



279x215mm (300 x 300 DPI)

1  
2  
3  
4  
5  
6  
7  
8  
9  
10  
11  
12  
13  
14  
15  
16  
17  
18  
19  
20  
21  
22  
23  
24  
25  
26  
27  
28  
29  
30  
31  
32  
33  
34  
35  
36  
37  
38  
39  
40  
41  
42  
43  
44  
45  
46  
47  
48  
49  
50  
51  
52  
53  
54  
55  
56  
57  
58  
59  
60

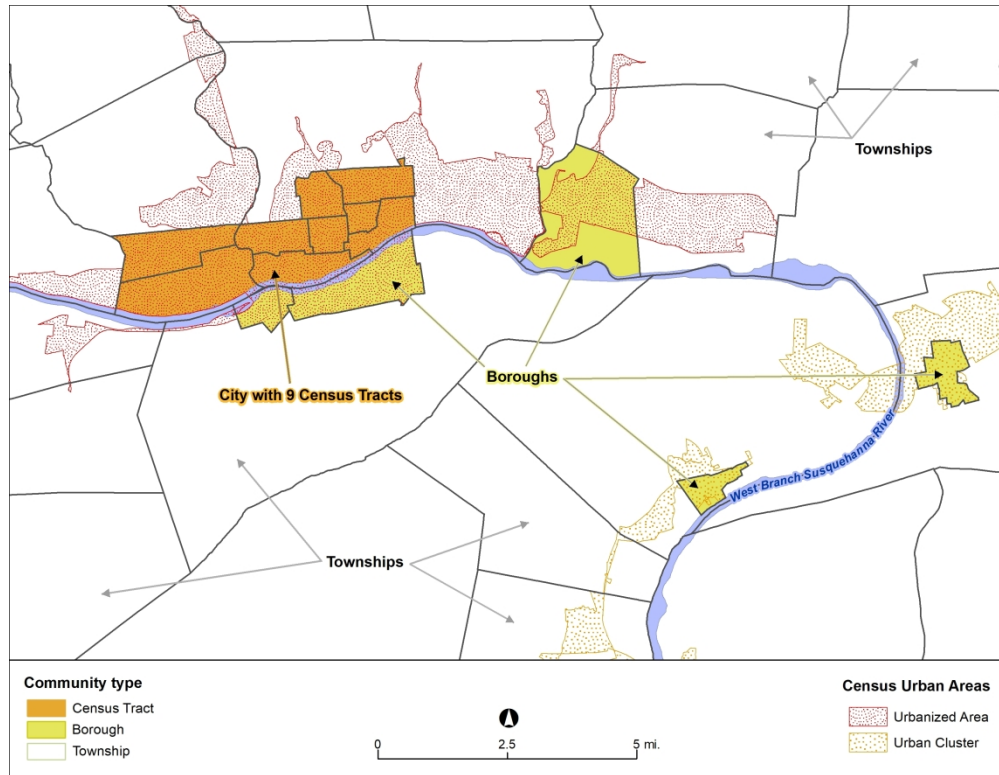

279x215mm (300 x 300 DPI)

## Online Supplement

**Table S1.** Diabetes case finding using EHR data.

**Must meet at least one of the following criteria:**

1. At least two separate encounter dates (inpatient, outpatient, emergency department) with type 2 diabetes diagnosis codes (ICD-9, ICD-10, or electronic diagnosis group [EDG]).
    - a. Excluded if had  $\geq 10$  years of type 1 diagnoses and  $< 5$  years with type 2 diagnoses.
    - b. Excluded if  $< 10$  years of age at first diabetes diagnosis.
  2. At least one diabetes medication order, other than metformin or acarbose if female. Metformin combination medications were included.
    - a. Excluded if first diabetes medication order was prior to age 10 years.
  3. At least one encounter with type 2 diabetes diagnosis and an abnormal laboratory value (random glucose  $\geq 200$  mg/dl; fasting glucose  $\geq 126$  mg/dl; or hemoglobin A1c  $\geq 6.5\%$ ).
    - a. Excluded if had  $\geq 10$  years of type 1 diagnoses and  $< 5$  years with type 2 diagnoses.
- The date of onset was assigned as the earliest date with any evidence of diabetes (e.g., had generic diabetes diagnoses that were not used for definition #1, or had abnormal laboratory value that was not accompanied by a diagnosis so did not meet definition #3).

**Notes:**

- a) To meet criteria #2 or #3, criterion had to occur  $> 9$  months prior to or  $> 1$  month after delivery of child (to avoid gestational diabetes). Gestational diabetes was not an exclusion if the individual subsequently developed type 2 diabetes. Date of onset was assigned as when the person met the type 2 diabetes criterion; and
- b) EDG codes are used in Epic EHR software (Epic Systems Corporation, Verona, WI) and often have higher specificity and greater detail.
- c) Of the 15,888 diabetes cases: 11,944 met criterion 1; 10,183 met criterion 2; 12,552 met criterion 3; 7008 met all three; and 4775 met at least two.
- d) Because metformin can be used for pre-diabetes, we evaluated how many persons could have had this diagnosis instead of diabetes in our diabetes onset definition. Of the 1579 men who met only definition #2, between 544 (3.4%) and 1207 (7.6%) may have had pre-diabetes instead of diabetes, depending on how longitudinal information on diagnoses, medications, medication indications, and abnormal laboratory results were used and interpreted.

**Table S2.** Selected characteristics of study individuals and communities by administrative community type.

| Variables                                                                                   | Borough         | Census Tract    | Township      |
|---------------------------------------------------------------------------------------------|-----------------|-----------------|---------------|
| <b>By community type (n = 1070 communities)</b>                                             |                 |                 |               |
| Number (%), total                                                                           | 291 (27.2)      | 146 (13.6)      | 633 (59.2)    |
| Number (%), among cases                                                                     | 224 (27.6)      | 107 (13.2)      | 482 (59.3)    |
| Number (%), among controls                                                                  | 278 (26.9)      | 137 (13.2)      | 620 (59.9)    |
| Counties with at least one resident in community type, n                                    | 35              | 16              | 37            |
| Counties with at least 20 residents in community type, n                                    | 27              | 9               | 32            |
| <b>Community measures, by community type (n = 1070 communities)</b>                         |                 |                 |               |
| Area, square miles, mean (SD)                                                               | 1.72 (2.32)     | 1.20 (3.52)     | 29.4 (18.1)   |
| Community socioeconomic deprivation, mean (SD)                                              | -0.09 (2.99)    | 4.17 (3.80)     | -1.15 (2.71)  |
| Population density, persons per square mile, mean (SD)                                      | 2094.7 (1642.3) | 6594.5 (5014.6) | 157.5 (279.4) |
| Developed land, % (SD)                                                                      | 37.2 (22.6)     | 72.6 (23.0)     | 3.66 (7.35)   |
| Intersection density per square mile, mean (SD)                                             | 120.6 (86.1)    | 208.5 (117.0)   | 13.34 (14.77) |
| <b>By participant (n = 95,323 individuals)</b>                                              |                 |                 |               |
| Cases, n (%) (total = 15,888)                                                               | 4621 (29.1)     | 1806 (11.4)     | 9461 (59.5)   |
| Controls, n (%) (total = 79,435)                                                            | 21,756 (27.4)   | 6548 (8.2)      | 51,131 (64.4) |
| Age at diabetes onset or control selection date, years, mean (SD)                           | 54.4 (15.9)     | 52.7 (16.1)     | 55.3 (14.8)   |
| Sex, female, n (%)                                                                          | 13,329 (50.2)   | 4449 (53.3)     | 29,098 (48.0) |
| Race, white, n (%)                                                                          | 245,963 (98.4)  | 7873 (94.2)     | 59,460 (98.1) |
| Ethnicity, Hispanic, n (%)                                                                  | 353 (1.3)       | 430 (5.2)       | 680 (1.1)     |
| Body mass index, kg/m <sup>2</sup> , mean (SD)                                              | 30.6 (7.47)     | 30.9 (7.96)     | 30.3 (6.94)   |
| Medical Assistance, % of time, mean (SD)                                                    | 5.9 (17.9)      | 10.3 (23.2)     | 3.3 (13.5)    |
| Medical Assistance, ever*, n (%)                                                            | 3311 (12.6)     | 1692 (20.3)     | 4311 (7.1)    |
| Contact with health system <u>before</u> diagnosis/control selection date, years, mean (SD) | 12.7 (4.37)     | 12.1 (4.57)     | 12.9 (4.34)   |
| Charlson index, mean (SD)                                                                   | 1.75 (1.83)     | 1.64 (1.78)     | 1.76 (1.78)   |
| Greenness, peak NDVI, in buffer, mean (SD)                                                  | 0.61 (0.11)     | 0.51 (0.10)     | 0.73 (0.10)   |
| Urban status by UA and UC boundaries, n (col %)                                             |                 |                 |               |
| Rural                                                                                       | 3031 (11.5)     | 10 (0.1)        | 38,456 (63.5) |
| Urbanized area (UA)                                                                         | 11,409 (43.3)   | 5414 (64.8)     | 11,506 (19.0) |
| Urban cluster (UC)                                                                          | 11,937 (45.3)   | 2930 (35.1)     | 10,630 (17.5) |
| Abbreviations: NDVI = normalized difference vegetation index; SD = standard deviation.      |                 |                 |               |
| * At least one encounter that used Medical Assistance for health insurance.                 |                 |                 |               |

**Table S3.** Mean outpatient encounters among cases and controls by community type and Medical Assistance status.

| Variable                                                                                                  | Cases, n = 15,888    |                                      |                       | Controls, n = 79,435   |                                   |                         |
|-----------------------------------------------------------------------------------------------------------|----------------------|--------------------------------------|-----------------------|------------------------|-----------------------------------|-------------------------|
|                                                                                                           | Boroughs<br>n = 4621 | City<br>Census<br>Tracts<br>n = 1806 | Townships<br>n = 9461 | Boroughs<br>n = 21,756 | City Census<br>Tracts<br>n = 6548 | Townships<br>n = 51,131 |
| Outpatient encounters, total before diagnosis, mean (SD)                                                  | 35.9 (34.8)          | 31.6 (32.1)                          | 36.8 (35.2)           | 35.7 (33.8)            | 33.5 (32.8)                       | 35.2 (31.8)             |
| Outpatient encounters before diagnosis, mean (SD), <u>by Medical Assistance status</u> (% time receiving) |                      |                                      |                       |                        |                                   |                         |
| 0%                                                                                                        | 35.2 (33.9)          | 30.9 (31.2)                          | 36.3 (34.6)           | 35.1 (33.1)            | 32.9 (32.1)                       | 35.0 (31.7)             |
| 0.1-24.9%                                                                                                 | 47.7 (41.3)          | 41.8 (44.3)                          | 44.7 (39.0)           | 44.2 (40.7)            | 40.0 (39.9)                       | 42.6 (36.1)             |
| 25.0-74.9%                                                                                                | 32.5 (34.5)          | 29.3 (25.4)                          | 37.1 (40.2)           | 37.3 (36.8)            | 33.6 (32.4)                       | 34.2 (31.4)             |
| 75+%                                                                                                      | 30.6 (28.9)          | 34.2 (21.0)                          | 30.7 (28.0)           | 27.7 (28.5)            | 27.9 (28.4)                       | 27.7 (22.6)             |
| SD = standard deviation                                                                                   |                      |                                      |                       |                        |                                   |                         |



### Medical Profile of Cases and Controls

To evaluate our categorization of diabetes cases and controls, we examined a number of biomarkers and other measures of relevance to diabetes, dysglycemia, and other cardio-metabolic risk factors development that were available in the EHR, including hemoglobin A1c (HbA1c), lipids (cholesterol and triglycerides), blood glucose (fasting and unspecified), and body mass index (BMI) (**Online Supplement Table S4**). Fasting blood glucose was measured in the year before the diabetes onset or control dates in 24% of cases and 29% of controls. Interestingly, the mean value was higher in the year before diagnosis in persons who would develop diabetes compared to those who would not, 108.5 vs. 95.8 mg/dL ( $p < 0.001$ ). In the year after diagnosis or control dates, fasting blood glucose was available in 58% of cases and 30% of controls, and mean levels were much higher in cases compared to controls (147.9 vs. 95.9,  $p < 0.001$ ). HbA1c, triglycerides, unspecified blood glucose, and BMI all evidenced similar patterns (**Online Supplement Table S4**). In the year before and after diagnosis, most cases and controls had BMI measured, with a much higher mean in cases compared to controls before and after diagnosis.

**Table S4.** Selected laboratory and other biometric values comparing new onset type 2 diabetes cases and controls without diabetes.

| Variable                                                                                           | Cases         | Controls      |
|----------------------------------------------------------------------------------------------------|---------------|---------------|
| Number                                                                                             | 15,888        | 79,435        |
| <b>Hemoglobin A1c (HbA1c)</b>                                                                      |               |               |
| # in year <u>before</u> diagnosis or control selection date per person, number of persons (%) with |               |               |
| 0 values                                                                                           | 13,618 (85.7) | 75,731 (95.3) |
| 1 value                                                                                            | 1801 (11.3)   | 3257 (4.1)    |
| 2+ values                                                                                          | 469 (3.0)     | 447 (0.6)     |
| Closest value in year <u>prior</u> to diagnosis or index date                                      |               |               |
| Persons with value, n (%)                                                                          | 2270 (14.3)   | 3704 (4.7)    |
| HbA1c %, mean (SD)                                                                                 | 5.9 (0.4)     | 5.6 (0.4)     |
| Closest value in year <u>after</u> diagnosis or index date                                         |               |               |
| Persons with value, n (%)                                                                          | 11,990 (75.5) | 3839 (4.8)    |
| HbA1c %, mean (SD)                                                                                 | 7.5 (2.0)     | 5.6 (0.4)     |
| <b>LDL cholesterol</b>                                                                             |               |               |
| # in year <u>before</u> diagnosis or index date per person, number of persons (%) with             |               |               |
| 0 values                                                                                           | 10,155 (63.9) | 46,485 (58.5) |
| 1 value                                                                                            | 4068 (25.6)   | 23,737 (29.9) |
| 2+ values                                                                                          | 1665 (10.5)   | 9213 (11.6)   |
| Closest value in year <u>prior</u> to diagnosis or index date                                      |               |               |
| Persons with value, n (%)                                                                          | 5733 (36.1)   | 32,950 (41.5) |
| LDL-cholesterol, mg/dL, mean (SD)                                                                  | 107.2 (35.6)  | 109.6 (33.0)  |
| Closest value in year <u>after</u> diagnosis or index date                                         |               |               |
| Persons with value, n (%)                                                                          | 11,726 (73.8) | 34,223 (43.1) |
| LDL-cholesterol, mg/dL, mean (SD)                                                                  | 108.5 (36.7)  | 111.1 (33.7)  |
| <b>Triglycerides</b>                                                                               |               |               |
| # in year <u>before</u> diagnosis or index date per person, number of persons (%) with             |               |               |
| 0 values                                                                                           | 10,529 (66.3) | 48,714 (61.3) |
| 1 value                                                                                            | 3869 (24.4)   | 22,585 (28.4) |
| 2+ values                                                                                          | 1490 (9.4)    | 8136 (10.2)   |
| Closest value in year <u>prior</u> to diagnosis or index date                                      |               |               |
| Persons with value, n (%)                                                                          | 5359 (33.7)   | 30,721 (38.7) |
| Triglycerides, mg/dL, mean (SD)                                                                    | 188.7 (131.7) | 133.7 (81.2)  |
| Closest value in year <u>after</u> diagnosis or index date                                         |               |               |
| Persons with value, n (%)                                                                          | 11,207 (70.5) | 31,663 (39.9) |
| Triglycerides, mg/dL, mean (SD)                                                                    | 216.5 (244.8) | 135.0 (86.8)  |
| <b>Glucose, fasting</b>                                                                            |               |               |
| # in year <u>before</u> diagnosis or index date per person, # of persons (%) with                  |               |               |
| 0 values                                                                                           | 12,139 (76.4) | 56,198 (70.8) |
| 1 value                                                                                            | 2968 (18.7)   | 19,023 (24.0) |
| 2+ values                                                                                          | 781 (5.0)     | 4214 (5.3)    |

| Variable                                                                       | Cases         | Controls      |
|--------------------------------------------------------------------------------|---------------|---------------|
| Closest value in year <u>prior</u> to diagnosis or index date                  |               |               |
| Persons with value, n (%)                                                      | 3749 (23.6)   | 23,237 (29.3) |
| Glucose, mg/dL, mean (SD)                                                      | 108.5 (11.8)  | 95.8 (9.3)    |
| Closest value in year <u>after</u> diagnosis or index date                     |               |               |
| Persons with value, n (%)                                                      | 9259 (58.3)   | 24,105 (30.3) |
| Glucose, mg/dL, mean (SD)                                                      | 147.9 (60.9)  | 95.9 (9.3)    |
| <b>Glucose, unspecified</b>                                                    |               |               |
| # in year <u>before</u> diagnosis or index date per person, # persons (%) with |               |               |
| 0 values                                                                       | 9913 (62.4)   | 54,258 (68.3) |
| 1 value                                                                        | 3115 (19.6)   | 15,293 (19.3) |
| 2+ values                                                                      | 2860 (18.0)   | 9884 (12.4)   |
| Closest value in year <u>prior</u> to diagnosis or index date                  |               |               |
| Persons with value, n (%)                                                      | 5975 (37.6)   | 25,177 (31.7) |
| Glucose, mg/dL, mean (SD)                                                      | 124.6 (28.2)  | 97.7 (15.5)   |
| Closest value in year <u>after</u> diagnosis or index date                     |               |               |
| Persons with value, n (%)                                                      | 10,833 (68.2) | 27,779 (35.0) |
| Glucose, mg/dL, mean (SD)                                                      | 170.7 (95.2)  | 98.4 (16.5)   |
| <b>Body mass index (BMI)</b>                                                   |               |               |
| # in year <u>before</u> diagnosis or index date per person, mean (SD)          | 3.1 (4.1)     | 2.4 (3.2)     |
| Closest value in year <u>prior</u> to diagnosis or index date                  |               |               |
| Persons with value, n (%)                                                      | 11,237 (70.7) | 54,733 (68.9) |
| BMI, kg/m <sup>2</sup> , mean (SD)                                             | 36.2 (8.4)    | 29.3 (6.4)    |
| Closest value in year <u>after</u> diagnosis or index date                     |               |               |
| Persons with value, n (%)                                                      | 13,957 (87.9) | 65,084 (81.9) |
| BMI, kg/m <sup>2</sup> , mean (SD)                                             | 36.0 (8.4)    | 29.3 (6.4)    |

**Table S5.** Adjusted\* associations of selected independent variables with type 2 diabetes status stratified by administrative community type.

| Variable                                                                                                                                                                                                                                                                                                                                                                                                                                                                                                                                                                                                                                 | Stratified by Administrative Community Type |                         |                         | Stratified by Administrative Community Type |                         |                         |
|------------------------------------------------------------------------------------------------------------------------------------------------------------------------------------------------------------------------------------------------------------------------------------------------------------------------------------------------------------------------------------------------------------------------------------------------------------------------------------------------------------------------------------------------------------------------------------------------------------------------------------------|---------------------------------------------|-------------------------|-------------------------|---------------------------------------------|-------------------------|-------------------------|
|                                                                                                                                                                                                                                                                                                                                                                                                                                                                                                                                                                                                                                          | Boroughs                                    | City Census Tracts      | Townships               | Boroughs                                    | City Census Tracts      | Townships               |
|                                                                                                                                                                                                                                                                                                                                                                                                                                                                                                                                                                                                                                          | Model 1a<br>OR (95% CI)                     | Model 1b<br>OR (95% CI) | Model 1c<br>OR (95% CI) | Model 2a<br>OR (95% CI)                     | Model 2b<br>OR (95% CI) | Model 2c<br>OR (95% CI) |
| Race                                                                                                                                                                                                                                                                                                                                                                                                                                                                                                                                                                                                                                     |                                             |                         |                         |                                             |                         |                         |
| White                                                                                                                                                                                                                                                                                                                                                                                                                                                                                                                                                                                                                                    | 1.0                                         | 1.0                     | 1.0                     | 1.0                                         | 1.0                     | 1.0                     |
| All others                                                                                                                                                                                                                                                                                                                                                                                                                                                                                                                                                                                                                               | 1.44 (1.12, 1.94)                           | 1.30 (1.05, 1.60)       | 1.36 (1.14, 1.61)       | 1.43 (1.12, 1.84)                           | 1.28 (1.04, 1.58)       | 1.35 (1.14, 1.61)       |
| Ethnicity                                                                                                                                                                                                                                                                                                                                                                                                                                                                                                                                                                                                                                |                                             |                         |                         |                                             |                         |                         |
| Non-Hispanic                                                                                                                                                                                                                                                                                                                                                                                                                                                                                                                                                                                                                             | 1.0                                         | 1.0                     | 1.0                     | 1.0                                         | 1.0                     | 1.0                     |
| Hispanic                                                                                                                                                                                                                                                                                                                                                                                                                                                                                                                                                                                                                                 | 1.50 (1.16, 1.94)                           | 1.33 (1.02, 1.72)       | 1.52 (1.16, 1.97)       | 1.50 (1.16, 1.94)                           | 1.32 (1.02, 1.71)       | 1.52 (1.17, 1.97)       |
| Medical Assistance                                                                                                                                                                                                                                                                                                                                                                                                                                                                                                                                                                                                                       |                                             |                         |                         |                                             |                         |                         |
| < 50% of time                                                                                                                                                                                                                                                                                                                                                                                                                                                                                                                                                                                                                            | 1.0                                         | 1.0                     | 1.0                     | 1.0                                         | 1.0                     | 1.0                     |
| 50+% of time                                                                                                                                                                                                                                                                                                                                                                                                                                                                                                                                                                                                                             | 1.66 (1.47, 1.86)                           | 1.46 (1.26, 1.70)       | 1.83 (1.61, 2.09)       | 1.66 (1.48, 1.86)                           | 1.48 (1.27, 1.72)       | 1.83 (1.61, 2.09)       |
| CSD **                                                                                                                                                                                                                                                                                                                                                                                                                                                                                                                                                                                                                                   |                                             |                         |                         |                                             |                         |                         |
| Q1                                                                                                                                                                                                                                                                                                                                                                                                                                                                                                                                                                                                                                       | 0.88 (0.77, 1.01)                           | 0.75 (0.56, 1.00)       | 0.93 (0.84, 1.02)       |                                             |                         |                         |
| Q2                                                                                                                                                                                                                                                                                                                                                                                                                                                                                                                                                                                                                                       | 0.96 (0.84, 1.08)                           | 0.77 (0.63, 0.94)       | 0.97 (0.89, 1.06)       |                                             |                         |                         |
| Q3                                                                                                                                                                                                                                                                                                                                                                                                                                                                                                                                                                                                                                       | 0.98 (0.87, 1.10)                           | 0.78 (0.67, 0.91)       | 0.98 (0.89, 1.07)       |                                             |                         |                         |
| Q4                                                                                                                                                                                                                                                                                                                                                                                                                                                                                                                                                                                                                                       | 1.0                                         | 1.0                     | 1.0                     |                                             |                         |                         |
| NDVI, 1250x1250m †                                                                                                                                                                                                                                                                                                                                                                                                                                                                                                                                                                                                                       |                                             |                         |                         |                                             |                         |                         |
| T1                                                                                                                                                                                                                                                                                                                                                                                                                                                                                                                                                                                                                                       |                                             |                         |                         | 1.0                                         | 1.0                     | 1.0                     |
| T2                                                                                                                                                                                                                                                                                                                                                                                                                                                                                                                                                                                                                                       |                                             |                         |                         | 0.93 (0.87, 0.99)                           | 0.76 (0.64, 0.90)       | 0.93 (0.87, 0.99)       |
| T3                                                                                                                                                                                                                                                                                                                                                                                                                                                                                                                                                                                                                                       |                                             |                         |                         | 0.85 (0.76, 0.96)                           | 0.76 (0.50, 1.17)       | 0.90 (0.84, 0.96)       |
| <p><b>Abbreviations:</b> CSD = community socioeconomic deprivation; NDVI = normalized difference vegetation index;</p> <p>* Logistic regression models using generalized estimating equations with robust standard errors; also adjusted for sex and age (age, age<sup>2</sup>, age<sup>3</sup>).</p> <p>** Quartile cutoffs were defined within the three time periods; the range of values for persons in Q1, Q2, Q3, and Q4 were -25.06 to -1.82; -1.99 to 0.10; 0.005 to 2.05; and 1.89 to 12.4, respectively.</p> <p>† The range of values in T1, T2, and T3 were 0.07 to 0.627, 0.63 to 0.756, and 0.76 to 0.94, respectively.</p> |                                             |                         |                         |                                             |                         |                         |

**Table S6.** Adjusted\* associations of selected independent variables with type 2 diabetes status stratified by administrative community type with county and community socioeconomic deprivation **OR** greenness.

| Variable                                                                                                                                                                                                                                                                                                                                                                  | Stratified by Administrative Community Type |                          |                          |
|---------------------------------------------------------------------------------------------------------------------------------------------------------------------------------------------------------------------------------------------------------------------------------------------------------------------------------------------------------------------------|---------------------------------------------|--------------------------|--------------------------|
|                                                                                                                                                                                                                                                                                                                                                                           | Boroughs                                    | City Census Tracts       | Townships                |
|                                                                                                                                                                                                                                                                                                                                                                           | Model 1<br>OR (95% CI)                      | Model 1<br>OR (95% CI)   | Model 1<br>OR (95% CI)   |
| <b>Model 1 – with county and community socioeconomic deprivation (CSD)</b>                                                                                                                                                                                                                                                                                                |                                             |                          |                          |
| Race                                                                                                                                                                                                                                                                                                                                                                      |                                             |                          |                          |
| White                                                                                                                                                                                                                                                                                                                                                                     | 1.0                                         | 1.0                      | 1.0                      |
| All others                                                                                                                                                                                                                                                                                                                                                                | 1.45 (1.13, 1.86)                           | 1.31 (1.06, 1.62)        | 1.39 (1.16, 1.66)        |
| Ethnicity                                                                                                                                                                                                                                                                                                                                                                 |                                             |                          |                          |
| Non-Hispanic                                                                                                                                                                                                                                                                                                                                                              | 1.0                                         | 1.0                      | 1.0                      |
| Hispanic                                                                                                                                                                                                                                                                                                                                                                  | 1.49 (1.15, 1.92)                           | 1.32 (1.02, 1.71)        | 1.55 (1.18, 2.04)        |
| Medical Assistance                                                                                                                                                                                                                                                                                                                                                        |                                             |                          |                          |
| < 50% of time                                                                                                                                                                                                                                                                                                                                                             | 1.0                                         | 1.0                      | 1.0                      |
| 50+% of time                                                                                                                                                                                                                                                                                                                                                              | 1.66 (1.47, 1.87)                           | 1.48 (1.28, 1.72)        | 1.85 (1.62, 2.11)        |
| Community socioeconomic deprivation, quartiles                                                                                                                                                                                                                                                                                                                            |                                             |                          |                          |
| Q1                                                                                                                                                                                                                                                                                                                                                                        | 0.87 (0.76, 0.996)                          | 0.71 (0.52, 0.95)        | 0.91 (0.82, 0.99)        |
| Q2                                                                                                                                                                                                                                                                                                                                                                        | 0.93 (0.83, 1.06)                           | 0.78 (0.65, 0.95)        | 0.96 (0.88, 1.05)        |
| Q3                                                                                                                                                                                                                                                                                                                                                                        | 0.97 (0.87, 1.09)                           | 0.79 (0.67, 0.93)        | 0.98 (0.90, 1.07)        |
| Q4                                                                                                                                                                                                                                                                                                                                                                        | 1.0                                         | 1.0                      | 1.0                      |
| County                                                                                                                                                                                                                                                                                                                                                                    |                                             |                          |                          |
| Luzerne                                                                                                                                                                                                                                                                                                                                                                   | 1.0                                         | 1.0                      | 1.0                      |
| Blair                                                                                                                                                                                                                                                                                                                                                                     | <b>0.64</b> (0.51, 0.81)                    | 0.62 (0.23, 1.64)        | 0.86 (0.61, 1.21)        |
| Clearfield                                                                                                                                                                                                                                                                                                                                                                | 1.00 (0.82, 1.24)                           | <b>0.76</b> (0.66, 0.87) | 0.97 (0.82, 1.15)        |
| Dauphin                                                                                                                                                                                                                                                                                                                                                                   | 0.90 (0.56, 1.45)                           | <b>2.81</b> (1.47, 5.37) | 1.43 (0.96, 2.15)        |
| Juniata                                                                                                                                                                                                                                                                                                                                                                   | <b>1.68</b> (1.22, 2.31)                    | NA†                      | 1.18 (0.99, 1.41)        |
| Lackawanna                                                                                                                                                                                                                                                                                                                                                                | 1.12 (0.96, 1.37)                           | <b>1.23</b> (1.06, 1.43) | 1.13 (0.93, 1.38)        |
| Lehigh                                                                                                                                                                                                                                                                                                                                                                    | <b>18.2</b> (2.00, 165.1)                   | 2.00 (0.85, 4.68)        | 0.66 (0.26, 1.65)        |
| Mifflin                                                                                                                                                                                                                                                                                                                                                                   | <b>1.20</b> (1.00, 1.43)                    | NA                       | 1.06 (0.93, 1.21)        |
| Monroe                                                                                                                                                                                                                                                                                                                                                                    | <b>0.73</b> (0.59, 0.91)                    | NA                       | <b>0.85</b> (0.74, 0.98) |
| Perry                                                                                                                                                                                                                                                                                                                                                                     | <b>3.16</b> (1.34, 7.47)                    | NA                       | 0.96 (0.51, 1.83)        |
| Potter                                                                                                                                                                                                                                                                                                                                                                    | <b>4.90</b> (4.42, 5.43)                    | NA                       | 0.71 (0.15, 3.31)        |
| Schuylkill                                                                                                                                                                                                                                                                                                                                                                | 0.91 (0.80, 1.02)                           | 0.93 (0.80, 1.07)        | <b>0.82</b> (0.73, 0.91) |
| Snyder                                                                                                                                                                                                                                                                                                                                                                    | <b>0.84</b> (0.72, 0.98)                    | NA                       | 1.01 (0.88, 1.16)        |
| Sullivan                                                                                                                                                                                                                                                                                                                                                                  | 0.63 (0.38, 1.07)                           | NA                       | <b>0.65</b> (0.47, 0.90) |
| Union                                                                                                                                                                                                                                                                                                                                                                     | 0.84 (0.53, 1.34)                           | NA                       | <b>0.80</b> (0.66, 0.98) |
| Wayne                                                                                                                                                                                                                                                                                                                                                                     | <b>3.36</b> (1.83, 6.16)                    | NA                       | 0.96 (0.59, 1.58)        |
| Wyoming                                                                                                                                                                                                                                                                                                                                                                   | <b>0.86</b> (0.76, 0.96)                    | NA                       | <b>1.15</b> (1.00, 1.32) |
| <b>Model 2 – same as Model 1, but with NDVI not CSD, with county; only NDVI associations are shown</b>                                                                                                                                                                                                                                                                    |                                             |                          |                          |
| Normalized difference vegetation index (NDVI)                                                                                                                                                                                                                                                                                                                             |                                             |                          |                          |
| T1                                                                                                                                                                                                                                                                                                                                                                        | 1.0                                         | 1.0                      | 1.0                      |
| T2                                                                                                                                                                                                                                                                                                                                                                        | 0.91 (0.85, 0.98)                           | 0.77 (0.64, 0.92)        | 0.93 (0.87, 0.99)        |
| T3                                                                                                                                                                                                                                                                                                                                                                        | 0.85 (0.75, 0.97)                           | 0.76 (0.48, 1.19)        | 0.90 (0.84, 0.97)        |
| * Logistic regression models using generalized estimating equations with robust standard errors; also adjusted for sex and age (age, age <sup>2</sup> , age <sup>3</sup> ). Counties with at least one association that excluded 1.0 in confidence interval included in table (37 counties were included in total; 36 county indicators vs. Luzerne County as reference). |                                             |                          |                          |
| † NA = these counties did not have city minor civil divisions or did not converge due to small numbers.                                                                                                                                                                                                                                                                   |                                             |                          |                          |

1  
2  
3  
4  
5  
6  
7  
8  
9  
10  
11  
12  
13  
14  
15  
16  
17  
18  
19  
20  
21  
22  
23  
24  
25  
26  
27  
28  
29  
30  
31  
32  
33  
34  
35  
36  
37  
38  
39  
40  
41  
42  
43  
44  
45  
46  
47  
48  
49  
50  
51  
52  
53  
54  
55  
56  
57  
58  
59  
60STROBE Statement—Checklist of items that should be included in reports of *case-control studies*

|                              | Item No | Recommendation                                                                                                                                                                                    | Page No |
|------------------------------|---------|---------------------------------------------------------------------------------------------------------------------------------------------------------------------------------------------------|---------|
| <b>Title and abstract</b>    | 1       | (a) Indicate the study's design with a commonly used term in the title or the abstract                                                                                                            | 3       |
|                              |         | (b) Provide in the abstract an informative and balanced summary of what was done and what was found                                                                                               | 3       |
| <b>Introduction</b>          |         |                                                                                                                                                                                                   |         |
| Background/rationale         | 2       | Explain the scientific background and rationale for the investigation being reported                                                                                                              | 5-6     |
| Objectives                   | 3       | State specific objectives, including any prespecified hypotheses                                                                                                                                  | 6, 9    |
| <b>Methods</b>               |         |                                                                                                                                                                                                   |         |
| Study design                 | 4       | Present key elements of study design early in the paper                                                                                                                                           | 6, 7    |
| Setting                      | 5       | Describe the setting, locations, and relevant dates, including periods of recruitment, exposure, follow-up, and data collection                                                                   | 7       |
| Participants                 | 6       | (a) Give the eligibility criteria, and the sources and methods of case ascertainment and control selection. Give the rationale for the choice of cases and controls                               | 7, 8    |
|                              |         | (b) For matched studies, give matching criteria and the number of controls per case                                                                                                               | 7       |
| Variables                    | 7       | Clearly define all outcomes, exposures, predictors, potential confounders, and effect modifiers. Give diagnostic criteria, if applicable                                                          | 7-9     |
| Data sources/<br>measurement | 8*      | For each variable of interest, give sources of data and details of methods of assessment (measurement). Describe comparability of assessment methods if there is more than one group              | 7-9     |
| Bias                         | 9       | Describe any efforts to address potential sources of bias                                                                                                                                         | 9, 10   |
| Study size                   | 10      | Explain how the study size was arrived at                                                                                                                                                         | 7       |
| Quantitative variables       | 11      | Explain how quantitative variables were handled in the analyses. If applicable, describe which groupings were chosen and why                                                                      | 9, 10   |
| Statistical methods          | 12      | (a) Describe all statistical methods, including those used to control for confounding                                                                                                             | 9, 10   |
|                              |         | (b) Describe any methods used to examine subgroups and interactions                                                                                                                               | 9, 10   |
|                              |         | (c) Explain how missing data were addressed                                                                                                                                                       | 9, 10   |
|                              |         | (d) If applicable, explain how matching of cases and controls was addressed                                                                                                                       | 9, 10   |
|                              |         | (e) Describe any sensitivity analyses                                                                                                                                                             | 9, 10   |
| <b>Results</b>               |         |                                                                                                                                                                                                   |         |
| Participants                 | 13*     | (a) Report numbers of individuals at each stage of study—eg numbers potentially eligible, examined for eligibility, confirmed eligible, included in the study, completing follow-up, and analysed | 7       |
|                              |         | (b) Give reasons for non-participation at each stage                                                                                                                                              | NA      |
|                              |         | (c) Consider use of a flow diagram                                                                                                                                                                | NA      |
| Descriptive data             | 14*     | (a) Give characteristics of study participants (eg demographic, clinical, social) and information on exposures and potential confounders                                                          | 21, 22  |
|                              |         | (b) Indicate number of participants with missing data for each variable of interest                                                                                                               | NA      |
| Outcome data                 | 15*     | Report numbers in each exposure category, or summary measures of exposure                                                                                                                         | 21, 22  |
