# Supplementary material for: Association of community types and features in a case–control analysis of new onset type 2 diabetes across a diverse geography in Pennsylvania
Source: PubMed Central journal article supplement — BMJ Open. 2021 Jan 13;11(1):e043528. doi: 10.1136/bmjopen-2020-043528 (PMC7812110; doi:10.1136/bmjopen-2020-043528), 2021-01-13
Supplement: bmjopen-2020-043528supp001.pdf [file bmjopen-2020-043528supp001.pdf]

## Online Supplement

**Table S1.** Diabetes case finding using EHR data.

**Must meet at least one of the following criteria:**

1. At least two separate encounter dates (inpatient, outpatient, emergency department) with type 2 diabetes diagnosis codes (ICD-9, ICD-10, or electronic diagnosis group [EDG]).
    - a. Excluded if had  $\geq 10$  years of type 1 diagnoses and  $< 5$  years with type 2 diagnoses.
    - b. Excluded if  $< 10$  years of age at first diabetes diagnosis.
  2. At least one diabetes medication order, other than metformin or acarbose if female. Metformin combination medications were included.
    - a. Excluded if first diabetes medication order was prior to age 10 years.
  3. At least one encounter with type 2 diabetes diagnosis and an abnormal laboratory value (random glucose  $\geq 200$  mg/dl; fasting glucose  $\geq 126$  mg/dl; or hemoglobin A1c  $\geq 6.5\%$ ).
    - a. Excluded if had  $\geq 10$  years of type 1 diagnoses and  $< 5$  years with type 2 diagnoses.
- The date of onset was assigned as the earliest date with any evidence of diabetes (e.g., had generic diabetes diagnoses that were not used for definition #1, or had abnormal laboratory value that was not accompanied by a diagnosis so did not meet definition #3).

Notes:

- a) To meet criteria #2 or #3, criterion had to occur  $> 9$  months prior to or  $> 1$  month after delivery of child (to avoid gestational diabetes). Gestational diabetes was not an exclusion if the individual subsequently developed type 2 diabetes. Date of onset was assigned as when the person met the type 2 diabetes criterion; and
- b) EDG codes are used in Epic EHR software (Epic Systems Corporation, Verona, WI) and often have higher specificity and greater detail.
- c) Of the 15,888 diabetes cases: 11,944 met criterion 1; 10,183 met criterion 2; 12,552 met criterion 3; 7008 met all three; and 4775 met at least two.
- d) Because metformin can be used for pre-diabetes, we evaluated how many persons could have had this diagnosis instead of diabetes in our diabetes onset definition. Of the 1579 men who met only definition #2, between 544 (3.4%) and 1207 (7.6%) may have had pre-diabetes instead of diabetes, depending on how longitudinal information on diagnoses, medications, medication indications, and abnormal laboratory results were used and interpreted.

**Table S2.** Selected characteristics of study individuals and communities by administrative community type.

| Variables                                                                                   | Borough         | Census Tract    | Township      |
|---------------------------------------------------------------------------------------------|-----------------|-----------------|---------------|
| <b>By community type</b> (n = 1070 communities)                                             |                 |                 |               |
| Number (%), total                                                                           | 291 (27.2)      | 146 (13.6)      | 633 (59.2)    |
| Number (%), among cases                                                                     | 224 (27.6)      | 107 (13.2)      | 482 (59.3)    |
| Number (%), among controls                                                                  | 278 (26.9)      | 137 (13.2)      | 620 (59.9)    |
| Counties with at least one resident in community type, n                                    | 35              | 16              | 37            |
| Counties with at least 20 residents in community type, n                                    | 27              | 9               | 32            |
| <b>Community measures, by community type</b> (n = 1070 communities)                         |                 |                 |               |
| Area, square miles, mean (SD)                                                               | 1.72 (2.32)     | 1.20 (3.52)     | 29.4 (18.1)   |
| Community socioeconomic deprivation, mean (SD)                                              | -0.09 (2.99)    | 4.17 (3.80)     | -1.15 (2.71)  |
| Population density, persons per square mile, mean (SD)                                      | 2094.7 (1642.3) | 6594.5 (5014.6) | 157.5 (279.4) |
| Developed land, % (SD)                                                                      | 37.2 (22.6)     | 72.6 (23.0)     | 3.66 (7.35)   |
| Intersection density per square mile, mean (SD)                                             | 120.6 (86.1)    | 208.5 (117.0)   | 13.34 (14.77) |
| <b>By participant</b> (n = 95,323 individuals)                                              |                 |                 |               |
| Cases, n (%) (total = 15,888)                                                               | 4621 (29.1)     | 1806 (11.4)     | 9461 (59.5)   |
| Controls, n (%) (total = 79,435)                                                            | 21,756 (27.4)   | 6548 (8.2)      | 51,131 (64.4) |
| Age at diabetes onset or control selection date, years, mean (SD)                           | 54.4 (15.9)     | 52.7 (16.1)     | 55.3 (14.8)   |
| Sex, female, n (%)                                                                          | 13,329 (50.2)   | 4449 (53.3)     | 29,098 (48.0) |
| Race, white, n (%)                                                                          | 245,963 (98.4)  | 7873 (94.2)     | 59,460 (98.1) |
| Ethnicity, Hispanic, n (%)                                                                  | 353 (1.3)       | 430 (5.2)       | 680 (1.1)     |
| Body mass index, kg/m <sup>2</sup> , mean (SD)                                              | 30.6 (7.47)     | 30.9 (7.96)     | 30.3 (6.94)   |
| Medical Assistance, % of time, mean (SD)                                                    | 5.9 (17.9)      | 10.3 (23.2)     | 3.3 (13.5)    |
| Medical Assistance, ever*, n (%)                                                            | 3311 (12.6)     | 1692 (20.3)     | 4311 (7.1)    |
| Contact with health system <u>before</u> diagnosis/control selection date, years, mean (SD) | 12.7 (4.37)     | 12.1 (4.57)     | 12.9 (4.34)   |
| Charlson index, mean (SD)                                                                   | 1.75 (1.83)     | 1.64 (1.78)     | 1.76 (1.78)   |
| Greenness, peak NDVI, in buffer, mean (SD)                                                  | 0.61 (0.11)     | 0.51 (0.10)     | 0.73 (0.10)   |
| Urban status by UA and UC boundaries, n (col %)                                             |                 |                 |               |
| Rural                                                                                       | 3031 (11.5)     | 10 (0.1)        | 38,456 (63.5) |
| Urbanized area (UA)                                                                         | 11,409 (43.3)   | 5414 (64.8)     | 11,506 (19.0) |
| Urban cluster (UC)                                                                          | 11,937 (45.3)   | 2930 (35.1)     | 10,630 (17.5) |
| Abbreviations: NDVI = normalized difference vegetation index; SD = standard deviation.      |                 |                 |               |
| * At least one encounter that used Medical Assistance for health insurance.                 |                 |                 |               |

**Table S3.** Mean outpatient encounters among cases and controls by community type and Medical Assistance status.

| Variable                                                                                           | Cases, n = 15,888    |                                      |                       | Controls, n = 79,435   |                                   |                         |
|----------------------------------------------------------------------------------------------------|----------------------|--------------------------------------|-----------------------|------------------------|-----------------------------------|-------------------------|
|                                                                                                    | Boroughs<br>n = 4621 | City<br>Census<br>Tracts<br>n = 1806 | Townships<br>n = 9461 | Boroughs<br>n = 21,756 | City Census<br>Tracts<br>n = 6548 | Townships<br>n = 51,131 |
| Outpatient encounters, total before diagnosis, mean (SD)                                           | 35.9 (34.8)          | 31.6 (32.1)                          | 36.8 (35.2)           | 35.7 (33.8)            | 33.5 (32.8)                       | 35.2 (31.8)             |
| Outpatient encounters before diagnosis, mean (SD), by Medical Assistance status (% time receiving) |                      |                                      |                       |                        |                                   |                         |
| 0%                                                                                                 | 35.2 (33.9)          | 30.9 (31.2)                          | 36.3 (34.6)           | 35.1 (33.1)            | 32.9 (32.1)                       | 35.0 (31.7)             |
| 0.1-24.9%                                                                                          | 47.7 (41.3)          | 41.8 (44.3)                          | 44.7 (39.0)           | 44.2 (40.7)            | 40.0 (39.9)                       | 42.6 (36.1)             |
| 25.0-74.9%                                                                                         | 32.5 (34.5)          | 29.3 (25.4)                          | 37.1 (40.2)           | 37.3 (36.8)            | 33.6 (32.4)                       | 34.2 (31.4)             |
| 75+%                                                                                               | 30.6 (28.9)          | 34.2 (21.0)                          | 30.7 (28.0)           | 27.7 (28.5)            | 27.9 (28.4)                       | 27.7 (22.6)             |
| SD = standard deviation                                                                            |                      |                                      |                       |                        |                                   |                         |

### Medical Profile of Cases and Controls

To evaluate our categorization of diabetes cases and controls, we examined a number of biomarkers and other measures of relevance to diabetes, dysglycemia, and other cardio-metabolic risk factors development that were available in the EHR, including hemoglobin A1c (HbA1c), lipids (cholesterol and triglycerides), blood glucose (fasting and unspecified), and body mass index (BMI) (**Online Supplement Table S4**). Fasting blood glucose was measured in the year before the diabetes onset or control dates in 24% of cases and 29% of controls. Interestingly, the mean value was higher in the year before diagnosis in persons who would develop diabetes compared to those who would not, 108.5 vs. 95.8 mg/dL ( $p < 0.001$ ). In the year after diagnosis or control dates, fasting blood glucose was available in 58% of cases and 30% of controls, and mean levels were much higher in cases compared to controls (147.9 vs. 95.9,  $p < 0.001$ ). HbA1c, triglycerides, unspecified blood glucose, and BMI all evidenced similar patterns (**Online Supplement Table S4**). In the year before and after diagnosis, most cases and controls had BMI measured, with a much higher mean in cases compared to controls before and after diagnosis.

**Table S4.** Selected laboratory and other biometric values comparing new onset type 2 diabetes cases and controls without diabetes.

| Variable                                                                                           | Cases         | Controls      |
|----------------------------------------------------------------------------------------------------|---------------|---------------|
| Number                                                                                             | 15,888        | 79,435        |
| <b>Hemoglobin A1c (HbA1c)</b>                                                                      |               |               |
| # in year <u>before</u> diagnosis or control selection date per person, number of persons (%) with |               |               |
| 0 values                                                                                           | 13,618 (85.7) | 75,731 (95.3) |
| 1 value                                                                                            | 1801 (11.3)   | 3257 (4.1)    |
| 2+ values                                                                                          | 469 (3.0)     | 447 (0.6)     |
| Closest value in year <u>prior</u> to diagnosis or index date                                      |               |               |
| Persons with value, n (%)                                                                          | 2270 (14.3)   | 3704 (4.7)    |
| HbA1c %, mean (SD)                                                                                 | 5.9 (0.4)     | 5.6 (0.4)     |
| Closest value in year <u>after</u> diagnosis or index date                                         |               |               |
| Persons with value, n (%)                                                                          | 11,990 (75.5) | 3839 (4.8)    |
| HbA1c %, mean (SD)                                                                                 | 7.5 (2.0)     | 5.6 (0.4)     |
| <b>LDL cholesterol</b>                                                                             |               |               |
| # in year <u>before</u> diagnosis or index date per person, number of persons (%) with             |               |               |
| 0 values                                                                                           | 10,155 (63.9) | 46,485 (58.5) |
| 1 value                                                                                            | 4068 (25.6)   | 23,737 (29.9) |
| 2+ values                                                                                          | 1665 (10.5)   | 9213 (11.6)   |
| Closest value in year <u>prior</u> to diagnosis or index date                                      |               |               |
| Persons with value, n (%)                                                                          | 5733 (36.1)   | 32,950 (41.5) |
| LDL-cholesterol, mg/dL, mean (SD)                                                                  | 107.2 (35.6)  | 109.6 (33.0)  |
| Closest value in year <u>after</u> diagnosis or index date                                         |               |               |
| Persons with value, n (%)                                                                          | 11,726 (73.8) | 34,223 (43.1) |
| LDL-cholesterol, mg/dL, mean (SD)                                                                  | 108.5 (36.7)  | 111.1 (33.7)  |
| <b>Triglycerides</b>                                                                               |               |               |
| # in year <u>before</u> diagnosis or index date per person, number of persons (%) with             |               |               |
| 0 values                                                                                           | 10,529 (66.3) | 48,714 (61.3) |
| 1 value                                                                                            | 3869 (24.4)   | 22,585 (28.4) |
| 2+ values                                                                                          | 1490 (9.4)    | 8136 (10.2)   |
| Closest value in year <u>prior</u> to diagnosis or index date                                      |               |               |
| Persons with value, n (%)                                                                          | 5359 (33.7)   | 30,721 (38.7) |
| Triglycerides, mg/dL, mean (SD)                                                                    | 188.7 (131.7) | 133.7 (81.2)  |
| Closest value in year <u>after</u> diagnosis or index date                                         |               |               |
| Persons with value, n (%)                                                                          | 11,207 (70.5) | 31,663 (39.9) |
| Triglycerides, mg/dL, mean (SD)                                                                    | 216.5 (244.8) | 135.0 (86.8)  |
| <b>Glucose, fasting</b>                                                                            |               |               |
| # in year <u>before</u> diagnosis or index date per person, # of persons (%) with                  |               |               |
| 0 values                                                                                           | 12,139 (76.4) | 56,198 (70.8) |
| 1 value                                                                                            | 2968 (18.7)   | 19,023 (24.0) |
| 2+ values                                                                                          | 781 (5.0)     | 4214 (5.3)    |

| Variable                                                                       | Cases         | Controls      |
|--------------------------------------------------------------------------------|---------------|---------------|
| Closest value in year <u>prior</u> to diagnosis or index date                  |               |               |
| Persons with value, n (%)                                                      | 3749 (23.6)   | 23,237 (29.3) |
| Glucose, mg/dL, mean (SD)                                                      | 108.5 (11.8)  | 95.8 (9.3)    |
| Closest value in year <u>after</u> diagnosis or index date                     |               |               |
| Persons with value, n (%)                                                      | 9259 (58.3)   | 24,105 (30.3) |
| Glucose, mg/dL, mean (SD)                                                      | 147.9 (60.9)  | 95.9 (9.3)    |
| <b>Glucose, unspecified</b>                                                    |               |               |
| # in year <u>before</u> diagnosis or index date per person, # persons (%) with |               |               |
| 0 values                                                                       | 9913 (62.4)   | 54,258 (68.3) |
| 1 value                                                                        | 3115 (19.6)   | 15,293 (19.3) |
| 2+ values                                                                      | 2860 (18.0)   | 9884 (12.4)   |
| Closest value in year <u>prior</u> to diagnosis or index date                  |               |               |
| Persons with value, n (%)                                                      | 5975 (37.6)   | 25,177 (31.7) |
| Glucose, mg/dL, mean (SD)                                                      | 124.6 (28.2)  | 97.7 (15.5)   |
| Closest value in year <u>after</u> diagnosis or index date                     |               |               |
| Persons with value, n (%)                                                      | 10,833 (68.2) | 27,779 (35.0) |
| Glucose, mg/dL, mean (SD)                                                      | 170.7 (95.2)  | 98.4 (16.5)   |
| <b>Body mass index (BMI)</b>                                                   |               |               |
| # in year <u>before</u> diagnosis or index date per person, mean (SD)          | 3.1 (4.1)     | 2.4 (3.2)     |
| Closest value in year <u>prior</u> to diagnosis or index date                  |               |               |
| Persons with value, n (%)                                                      | 11,237 (70.7) | 54,733 (68.9) |
| BMI, kg/m <sup>2</sup> , mean (SD)                                             | 36.2 (8.4)    | 29.3 (6.4)    |
| Closest value in year <u>after</u> diagnosis or index date                     |               |               |
| Persons with value, n (%)                                                      | 13,957 (87.9) | 65,084 (81.9) |
| BMI, kg/m <sup>2</sup> , mean (SD)                                             | 36.0 (8.4)    | 29.3 (6.4)    |

**Table S5.** Adjusted\* associations of selected independent variables with type 2 diabetes status stratified by administrative community type.

| Variable                                                                                                                                                                                                  | Stratified by Administrative Community Type |                         |                         | Stratified by Administrative Community Type |                         |                         |
|-----------------------------------------------------------------------------------------------------------------------------------------------------------------------------------------------------------|---------------------------------------------|-------------------------|-------------------------|---------------------------------------------|-------------------------|-------------------------|
|                                                                                                                                                                                                           | Boroughs                                    | City Census Tracts      | Townships               | Boroughs                                    | City Census Tracts      | Townships               |
|                                                                                                                                                                                                           | Model 1a<br>OR (95% CI)                     | Model 1b<br>OR (95% CI) | Model 1c<br>OR (95% CI) | Model 2a<br>OR (95% CI)                     | Model 2b<br>OR (95% CI) | Model 2c<br>OR (95% CI) |
| Race                                                                                                                                                                                                      |                                             |                         |                         |                                             |                         |                         |
| White                                                                                                                                                                                                     | 1.0                                         | 1.0                     | 1.0                     | 1.0                                         | 1.0                     | 1.0                     |
| All others                                                                                                                                                                                                | 1.44 (1.12, 1.94)                           | 1.30 (1.05, 1.60)       | 1.36 (1.14, 1.61)       | 1.43 (1.12, 1.84)                           | 1.28 (1.04, 1.58)       | 1.35 (1.14, 1.61)       |
| Ethnicity                                                                                                                                                                                                 |                                             |                         |                         |                                             |                         |                         |
| Non-Hispanic                                                                                                                                                                                              | 1.0                                         | 1.0                     | 1.0                     | 1.0                                         | 1.0                     | 1.0                     |
| Hispanic                                                                                                                                                                                                  | 1.50 (1.16, 1.94)                           | 1.33 (1.02, 1.72)       | 1.52 (1.16, 1.97)       | 1.50 (1.16, 1.94)                           | 1.32 (1.02, 1.71)       | 1.52 (1.17, 1.97)       |
| Medical Assistance                                                                                                                                                                                        |                                             |                         |                         |                                             |                         |                         |
| < 50% of time                                                                                                                                                                                             | 1.0                                         | 1.0                     | 1.0                     | 1.0                                         | 1.0                     | 1.0                     |
| 50+% of time                                                                                                                                                                                              | 1.66 (1.47, 1.86)                           | 1.46 (1.26, 1.70)       | 1.83 (1.61, 2.09)       | 1.66 (1.48, 1.86)                           | 1.48 (1.27, 1.72)       | 1.83 (1.61, 2.09)       |
| CSD **                                                                                                                                                                                                    |                                             |                         |                         |                                             |                         |                         |
| Q1                                                                                                                                                                                                        | 0.88 (0.77, 1.01)                           | 0.75 (0.56, 1.00)       | 0.93 (0.84, 1.02)       |                                             |                         |                         |
| Q2                                                                                                                                                                                                        | 0.96 (0.84, 1.08)                           | 0.77 (0.63, 0.94)       | 0.97 (0.89, 1.06)       |                                             |                         |                         |
| Q3                                                                                                                                                                                                        | 0.98 (0.87, 1.10)                           | 0.78 (0.67, 0.91)       | 0.98 (0.89, 1.07)       |                                             |                         |                         |
| Q4                                                                                                                                                                                                        | 1.0                                         | 1.0                     | 1.0                     |                                             |                         |                         |
| NDVI, 1250x1250m †                                                                                                                                                                                        |                                             |                         |                         |                                             |                         |                         |
| T1                                                                                                                                                                                                        |                                             |                         |                         | 1.0                                         | 1.0                     | 1.0                     |
| T2                                                                                                                                                                                                        |                                             |                         |                         | 0.93 (0.87, 0.99)                           | 0.76 (0.64, 0.90)       | 0.93 (0.87, 0.99)       |
| T3                                                                                                                                                                                                        |                                             |                         |                         | 0.85 (0.76, 0.96)                           | 0.76 (0.50, 1.17)       | 0.90 (0.84, 0.96)       |
| Abbreviations: CSD = community socioeconomic deprivation; NDVI = normalized difference vegetation index;                                                                                                  |                                             |                         |                         |                                             |                         |                         |
| * Logistic regression models using generalized estimating equations with robust standard errors; also adjusted for sex and age (age, age <sup>2</sup> , age <sup>3</sup> ).                               |                                             |                         |                         |                                             |                         |                         |
| ** Quartile cutoffs were defined within the three time periods; the range of values for persons in Q1, Q2, Q3, and Q4 were -25.06 to -1.82; -1.99 to 0.10; 0.005 to 2.05; and 1.89 to 12.4, respectively. |                                             |                         |                         |                                             |                         |                         |
| † The range of values in T1, T2, and T3 were 0.07 to 0.627, 0.63 to 0.756, and 0.76 to 0.94, respectively.                                                                                                |                                             |                         |                         |                                             |                         |                         |

**Table S6.** Adjusted\* associations of selected independent variables with type 2 diabetes status stratified by administrative community type with county and community socioeconomic deprivation **OR** greenness.

| Variable                                                                                                                                                                                                                                                                                                                                                                                                                                                                             | Stratified by Administrative Community Type |                          |                          |
|--------------------------------------------------------------------------------------------------------------------------------------------------------------------------------------------------------------------------------------------------------------------------------------------------------------------------------------------------------------------------------------------------------------------------------------------------------------------------------------|---------------------------------------------|--------------------------|--------------------------|
|                                                                                                                                                                                                                                                                                                                                                                                                                                                                                      | Boroughs                                    | City Census Tracts       | Townships                |
|                                                                                                                                                                                                                                                                                                                                                                                                                                                                                      | Model 1 OR (95% CI)                         | Model 1 OR (95% CI)      | Model 1 OR (95% CI)      |
| <b>Model 1 – with county and community socioeconomic deprivation (CSD)</b>                                                                                                                                                                                                                                                                                                                                                                                                           |                                             |                          |                          |
| Race                                                                                                                                                                                                                                                                                                                                                                                                                                                                                 |                                             |                          |                          |
| White                                                                                                                                                                                                                                                                                                                                                                                                                                                                                | 1.0                                         | 1.0                      | 1.0                      |
| All others                                                                                                                                                                                                                                                                                                                                                                                                                                                                           | 1.45 (1.13, 1.86)                           | 1.31 (1.06, 1.62)        | 1.39 (1.16, 1.66)        |
| Ethnicity                                                                                                                                                                                                                                                                                                                                                                                                                                                                            |                                             |                          |                          |
| Non-Hispanic                                                                                                                                                                                                                                                                                                                                                                                                                                                                         | 1.0                                         | 1.0                      | 1.0                      |
| Hispanic                                                                                                                                                                                                                                                                                                                                                                                                                                                                             | 1.49 (1.15, 1.92)                           | 1.32 (1.02, 1.71)        | 1.55 (1.18, 2.04)        |
| Medical Assistance                                                                                                                                                                                                                                                                                                                                                                                                                                                                   |                                             |                          |                          |
| < 50% of time                                                                                                                                                                                                                                                                                                                                                                                                                                                                        | 1.0                                         | 1.0                      | 1.0                      |
| 50+% of time                                                                                                                                                                                                                                                                                                                                                                                                                                                                         | 1.66 (1.47, 1.87)                           | 1.48 (1.28, 1.72)        | 1.85 (1.62, 2.11)        |
| Community socioeconomic deprivation, quartiles                                                                                                                                                                                                                                                                                                                                                                                                                                       |                                             |                          |                          |
| Q1                                                                                                                                                                                                                                                                                                                                                                                                                                                                                   | 0.87 (0.76, 0.996)                          | 0.71 (0.52, 0.95)        | 0.91 (0.82, 0.99)        |
| Q2                                                                                                                                                                                                                                                                                                                                                                                                                                                                                   | 0.93 (0.83, 1.06)                           | 0.78 (0.65, 0.95)        | 0.96 (0.88, 1.05)        |
| Q3                                                                                                                                                                                                                                                                                                                                                                                                                                                                                   | 0.97 (0.87, 1.09)                           | 0.79 (0.67, 0.93)        | 0.98 (0.90, 1.07)        |
| Q4                                                                                                                                                                                                                                                                                                                                                                                                                                                                                   | 1.0                                         | 1.0                      | 1.0                      |
| County                                                                                                                                                                                                                                                                                                                                                                                                                                                                               |                                             |                          |                          |
| Luzerne                                                                                                                                                                                                                                                                                                                                                                                                                                                                              | 1.0                                         | 1.0                      | 1.0                      |
| Blair                                                                                                                                                                                                                                                                                                                                                                                                                                                                                | <b>0.64</b> (0.51, 0.81)                    | 0.62 (0.23, 1.64)        | 0.86 (0.61, 1.21)        |
| Clearfield                                                                                                                                                                                                                                                                                                                                                                                                                                                                           | 1.00 (0.82, 1.24)                           | <b>0.76</b> (0.66, 0.87) | 0.97 (0.82, 1.15)        |
| Dauphin                                                                                                                                                                                                                                                                                                                                                                                                                                                                              | 0.90 (0.56, 1.45)                           | <b>2.81</b> (1.47, 5.37) | 1.43 (0.96, 2.15)        |
| Juniata                                                                                                                                                                                                                                                                                                                                                                                                                                                                              | <b>1.68</b> (1.22, 2.31)                    | NA†                      | 1.18 (0.99, 1.41)        |
| Lackawanna                                                                                                                                                                                                                                                                                                                                                                                                                                                                           | 1.12 (0.96, 1.37)                           | <b>1.23</b> (1.06, 1.43) | 1.13 (0.93, 1.38)        |
| Lehigh                                                                                                                                                                                                                                                                                                                                                                                                                                                                               | <b>18.2</b> (2.00, 165.1)                   | 2.00 (0.85, 4.68)        | 0.66 (0.26, 1.65)        |
| Mifflin                                                                                                                                                                                                                                                                                                                                                                                                                                                                              | <b>1.20</b> (1.00, 1.43)                    | NA                       | 1.06 (0.93, 1.21)        |
| Monroe                                                                                                                                                                                                                                                                                                                                                                                                                                                                               | <b>0.73</b> (0.59, 0.91)                    | NA                       | <b>0.85</b> (0.74, 0.98) |
| Perry                                                                                                                                                                                                                                                                                                                                                                                                                                                                                | <b>3.16</b> (1.34, 7.47)                    | NA                       | 0.96 (0.51, 1.83)        |
| Potter                                                                                                                                                                                                                                                                                                                                                                                                                                                                               | <b>4.90</b> (4.42, 5.43)                    | NA                       | 0.71 (0.15, 3.31)        |
| Schuylkill                                                                                                                                                                                                                                                                                                                                                                                                                                                                           | 0.91 (0.80, 1.02)                           | 0.93 (0.80, 1.07)        | <b>0.82</b> (0.73, 0.91) |
| Snyder                                                                                                                                                                                                                                                                                                                                                                                                                                                                               | <b>0.84</b> (0.72, 0.98)                    | NA                       | 1.01 (0.88, 1.16)        |
| Sullivan                                                                                                                                                                                                                                                                                                                                                                                                                                                                             | 0.63 (0.38, 1.07)                           | NA                       | <b>0.65</b> (0.47, 0.90) |
| Union                                                                                                                                                                                                                                                                                                                                                                                                                                                                                | 0.84 (0.53, 1.34)                           | NA                       | <b>0.80</b> (0.66, 0.98) |
| Wayne                                                                                                                                                                                                                                                                                                                                                                                                                                                                                | <b>3.36</b> (1.83, 6.16)                    | NA                       | 0.96 (0.59, 1.58)        |
| Wyoming                                                                                                                                                                                                                                                                                                                                                                                                                                                                              | <b>0.86</b> (0.76, 0.96)                    | NA                       | <b>1.15</b> (1.00, 1.32) |
| <b>Model 2 – same as Model 1, but with NDVI not CSD, with county; only NDVI associations are shown</b>                                                                                                                                                                                                                                                                                                                                                                               |                                             |                          |                          |
| Normalized difference vegetation index (NDVI)                                                                                                                                                                                                                                                                                                                                                                                                                                        |                                             |                          |                          |
| T1                                                                                                                                                                                                                                                                                                                                                                                                                                                                                   | 1.0                                         | 1.0                      | 1.0                      |
| T2                                                                                                                                                                                                                                                                                                                                                                                                                                                                                   | 0.91 (0.85, 0.98)                           | 0.77 (0.64, 0.92)        | 0.93 (0.87, 0.99)        |
| T3                                                                                                                                                                                                                                                                                                                                                                                                                                                                                   | 0.85 (0.75, 0.97)                           | 0.76 (0.48, 1.19)        | 0.90 (0.84, 0.97)        |
| * Logistic regression models using generalized estimating equations with robust standard errors; also adjusted for sex and age (age, age <sup>2</sup> , age <sup>3</sup> ). Counties with at least one association that excluded 1.0 in confidence interval included in table (37 counties were included in total; 36 county indicators vs. Luzerne County as reference).<br>† NA = these counties did not have city minor civil divisions or did not converge due to small numbers. |                                             |                          |                          |
